# Supplementary material
Source: PubMed Central journal article supplement (PMC6451440)
Supplement: NIHMS1020766-supplement-Supporting_Information.pdf [file NIHMS1020766-supplement-Supporting_Information.pdf]

## Supporting Information

### Elucidation of the Herbicidin Tailoring Pathway Offers New Insights into Its Structural Diversity

Hai-Xue Pan,<sup>†</sup> Zhang Chen,<sup>†</sup> Tianfang Zeng,<sup>‡</sup> Wen-Bing Jin,<sup>†</sup> Yujie Geng,<sup>⊥</sup> Geng-Min Lin,<sup>†</sup> Juan Zhao,<sup>†</sup> Wei-Tao Li,<sup>†</sup> Zijun Xiong,<sup>§</sup> Sheng-Xiong Huang,<sup>§</sup> Xin Zhai,<sup>‡</sup> Hung-wen Liu,<sup>\*,⊥,⊥</sup> and Gong-Li Tang<sup>\*,†</sup>

<sup>†</sup>State Key Laboratory of Bio-organic and Natural Products Chemistry, Center for Excellence in Molecular Synthesis, Shanghai Institute of Organic Chemistry, University of Chinese Academy of Sciences (CAS), CAS, Shanghai, 200032, China

<sup>⊥</sup>Department of Chemistry; <sup>⊥</sup>Division of Chemical Biology and Medicinal Chemistry, College of Pharmacy, University of Texas at Austin, Austin, TX 78712, USA

<sup>‡</sup>Key Laboratory of Structure-Based Drug Design & Discovery, Ministry of Education, Shenyang Pharmaceutical University, Shenyang 110016, China

<sup>§</sup>State Key Laboratory of Phytochemistry and Plant Resources in West China, Center for Excellence in Molecular Plant Sciences, Kunming Institute of Botany, CAS, Kunming, 650201, China

## Table of contents

|                                                                                                                                                                   |           |
|-------------------------------------------------------------------------------------------------------------------------------------------------------------------|-----------|
| <b>Experimental Procedures</b> .....                                                                                                                              | <b>5</b>  |
| 1. Materials.....                                                                                                                                                 | 5         |
| 2. Production and analysis of herbicidins and aureonuclemycin .....                                                                                               | 5         |
| 3. Identifications of the gene clusters and sequence analyses .....                                                                                               | 6         |
| 4. Heterologous expression of <i>anm</i> cluster in <i>S. lividans</i> .....                                                                                      | 6         |
| 5. Construction of gene deletion mutants of <i>S. sp.</i> KIB-027.....                                                                                            | 6         |
| 6. The <i>her10</i> deletion and complementation of <i>S. sp.</i> L-9-10.....                                                                                     | 8         |
| 7. Isolation of herbicidins and aureonuclemycin .....                                                                                                             | 8         |
| 8. Hydrolysis of herbicidin K.....                                                                                                                                | 10        |
| 9. Protein expression and purification.....                                                                                                                       | 10        |
| 10. Chemical synthesis of tiglyl-CoA and angelyl-CoA .....                                                                                                        | 11        |
| 11. Biochemical assays .....                                                                                                                                      | 12        |
| 12. Feeding study analysis of Her11 activity .....                                                                                                                | 14        |
| References.....                                                                                                                                                   | 14        |
| <b>Supplementary Tables:</b> .....                                                                                                                                | <b>15</b> |
| Table S1 NMR data of <b>10</b> in CD <sub>3</sub> OD (500 MHz for <sup>1</sup> H NMR and 125 MHz for <sup>13</sup> C NMR) .                                       | 15        |
| Table S2 Predicted functions of genes in herbicidin ( <i>hbc</i> ) biosynthetic gene cluster and the comparison with aureonuclemycin ( <i>anm</i> ) cluster ..... | 16        |
| Table S3 NMR data of <b>6</b> in CD <sub>3</sub> OD (500 MHz for <sup>1</sup> H NMR and 125 MHz for <sup>13</sup> C NMR) ...                                      | 17        |
| Table S4 NMR data of <b>8</b> in CD <sub>3</sub> OD (500 MHz for <sup>1</sup> H NMR and 125 MHz for <sup>13</sup> C NMR) ...                                      | 18        |

|                                                                                                                                                                                                   |           |
|---------------------------------------------------------------------------------------------------------------------------------------------------------------------------------------------------|-----------|
| Table S5 NMR data of <b>3</b> in CD <sub>3</sub> OD (500 MHz for <sup>1</sup> H NMR and 125 MHz for <sup>13</sup> C NMR) ...                                                                      | 19        |
| Table S6 NMR data of <b>5</b> in CD <sub>3</sub> OD (500 MHz for <sup>1</sup> H NMR and 125 MHz for <sup>13</sup> C NMR) ...                                                                      | 20        |
| Table S7 NMR data of <b>11</b> in CD <sub>3</sub> OD (500 MHz for <sup>1</sup> H NMR and 125 MHz for <sup>13</sup> C NMR)..                                                                       | 22        |
| Table S8 Strains and plasmids used in this study .....                                                                                                                                            | 23        |
| Table S9 Primers used in this study .....                                                                                                                                                         | 24        |
| <b>Supplementary Figures</b> .....                                                                                                                                                                | <b>26</b> |
| Figure S1 LC-MS analysis of <i>S. sp</i> KIB-027 fermentation broth. ....                                                                                                                         | 26        |
| Figure S2 <sup>1</sup> H NMR spectrum of <b>1</b> in CD <sub>3</sub> OD .....                                                                                                                     | 27        |
| Figure S3 <sup>13</sup> C NMR spectrum of <b>1</b> in CD <sub>3</sub> OD .....                                                                                                                    | 27        |
| Figure S4 HRMS data of <b>1</b> .....                                                                                                                                                             | 28        |
| Figure S5 <sup>1</sup> H NMR spectrum of <b>2</b> in CD <sub>3</sub> OD .....                                                                                                                     | 28        |
| Figure S6 <sup>13</sup> C NMR spectrum of <b>2</b> in CD <sub>3</sub> OD .....                                                                                                                    | 29        |
| Figure S7 HRMS data of <b>2</b> .....                                                                                                                                                             | 29        |
| Figure S8 <sup>1</sup> H NMR spectrum of <b>7</b> in CD <sub>3</sub> OD .....                                                                                                                     | 30        |
| Figure S9 <sup>13</sup> C NMR spectrum of <b>7</b> in CD <sub>3</sub> OD .....                                                                                                                    | 30        |
| Figure S10 HSQC spectrum of <b>7</b> in CD <sub>3</sub> OD.....                                                                                                                                   | 31        |
| Figure S11 HMBC spectrum of <b>7</b> in CD <sub>3</sub> OD.....                                                                                                                                   | 31        |
| Figure S12 <sup>1</sup> H- <sup>1</sup> H COSY spectrum of <b>7</b> in CD <sub>3</sub> OD .....                                                                                                   | 32        |
| Figure S13 HRMS data of <b>7</b> .....                                                                                                                                                            | 32        |
| Figure S14 <sup>1</sup> H NMR spectrum of <b>10</b> in CD <sub>3</sub> OD .....                                                                                                                   | 33        |
| Figure S15 <sup>13</sup> C NMR spectrum of <b>10</b> in CD <sub>3</sub> OD .....                                                                                                                  | 33        |
| Figure S16 DEPT90 spectrum of <b>10</b> in CD <sub>3</sub> OD .....                                                                                                                               | 34        |
| Figure S17 DEPT135 spectrum of <b>10</b> in CD <sub>3</sub> OD .....                                                                                                                              | 34        |
| Figure S18 HSQC spectrum of <b>10</b> in CD <sub>3</sub> OD.....                                                                                                                                  | 35        |
| Figure S19 HMBC spectrum of <b>10</b> in CD <sub>3</sub> OD.....                                                                                                                                  | 35        |
| Figure S20 <sup>1</sup> H- <sup>1</sup> H COSY spectrum of <b>10</b> in CD <sub>3</sub> OD .....                                                                                                  | 36        |
| Figure S21 NOESY spectrum of <b>10</b> in CD <sub>3</sub> OD .....                                                                                                                                | 36        |
| Figure S22 HRMS data of <b>10</b> .....                                                                                                                                                           | 37        |
| Figure S23 Genetic organization of biosynthetic gene clusters for herbicidins ( <i>hbc</i> , <i>her</i> ),<br>aureonuclemycin ( <i>anm</i> ), and some homologous BGCs found in NCBI Genbank..... | 38        |
| Figure S24 Heterologous expression of the <i>anm</i> cluster in <i>S. lividans</i> . ....                                                                                                         | 39        |
| Figure S25 <sup>1</sup> H NMR spectrum of <b>9</b> in CD <sub>3</sub> OD .....                                                                                                                    | 39        |
| Figure S26 <sup>13</sup> C NMR spectrum of <b>9</b> in CD <sub>3</sub> OD .....                                                                                                                   | 40        |
| Figure S27 <sup>1</sup> H NMR spectrum of <b>6</b> in CD <sub>3</sub> OD .....                                                                                                                    | 40        |
| Figure S28 <sup>13</sup> C NMR spectrum of <b>6</b> in CD <sub>3</sub> OD .....                                                                                                                   | 41        |
| Figure S29 DEPT135 spectrum of <b>6</b> in CD <sub>3</sub> OD .....                                                                                                                               | 41        |
| Figure S30 HSQC spectrum of <b>6</b> in CD <sub>3</sub> OD.....                                                                                                                                   | 42        |
| Figure S31 HMBC spectrum of <b>6</b> in CD <sub>3</sub> OD.....                                                                                                                                   | 42        |
| Figure S32 <sup>1</sup> H- <sup>1</sup> H COSY spectrum of <b>6</b> in CD <sub>3</sub> OD .....                                                                                                   | 43        |
| Figure S33 NOESY spectrum of <b>6</b> in CD <sub>3</sub> OD .....                                                                                                                                 | 43        |
| Figure S34 HRMS data of <b>6</b> .....                                                                                                                                                            | 44        |
| Figure S35 <sup>1</sup> H NMR spectrum of <b>8</b> in CD <sub>3</sub> OD .....                                                                                                                    | 45        |
| Figure S36 <sup>13</sup> C NMR spectrum of <b>8</b> in CD <sub>3</sub> OD .....                                                                                                                   | 45        |
| Figure S37 DEPT135 spectrum of <b>8</b> in CD <sub>3</sub> OD .....                                                                                                                               | 46        |

|                                                                                                                          |    |
|--------------------------------------------------------------------------------------------------------------------------|----|
| Figure S38 HSQC spectrum of <b>8</b> in CD <sub>3</sub> OD.....                                                          | 46 |
| Figure S39 HMBC spectrum of <b>8</b> in CD <sub>3</sub> OD.....                                                          | 47 |
| Figure S40 <sup>1</sup> H- <sup>1</sup> H COSY spectrum of <b>8</b> in CD <sub>3</sub> OD .....                          | 47 |
| Figure S41 NOESY spectrum of <b>8</b> in CD <sub>3</sub> OD .....                                                        | 48 |
| Figure S42 HRMS data of <b>8</b> .....                                                                                   | 48 |
| Figure S43 <sup>1</sup> H NMR spectrum of <b>3</b> in CD <sub>3</sub> OD .....                                           | 49 |
| Figure S44 <sup>13</sup> C NMR spectrum of <b>3</b> in CD <sub>3</sub> OD .....                                          | 49 |
| Figure S45 DEPT135 spectrum of <b>3</b> in CD <sub>3</sub> OD .....                                                      | 50 |
| Figure S46 HSQC spectrum of <b>3</b> in CD <sub>3</sub> OD.....                                                          | 50 |
| Figure S47 HMBC spectrum of <b>3</b> in CD <sub>3</sub> OD.....                                                          | 51 |
| Figure S48 <sup>1</sup> H- <sup>1</sup> H COSY spectrum of <b>3</b> in CD <sub>3</sub> OD .....                          | 51 |
| Figure S49 NOESY spectrum of <b>3</b> in CD <sub>3</sub> OD .....                                                        | 52 |
| Figure S50 HRMS data of <b>3</b> .....                                                                                   | 52 |
| Figure S51 <sup>1</sup> H NMR spectrum of <b>5</b> in CD <sub>3</sub> OD .....                                           | 53 |
| Figure S52 <sup>13</sup> C NMR spectrum of <b>5</b> in CD <sub>3</sub> OD .....                                          | 53 |
| Figure S53 DEPT135 spectrum of <b>5</b> in CD <sub>3</sub> OD .....                                                      | 54 |
| Figure S54 HSQC spectrum of <b>5</b> in CD <sub>3</sub> OD.....                                                          | 54 |
| Figure S55 HMBC spectrum of <b>5</b> in CD <sub>3</sub> OD.....                                                          | 55 |
| Figure S56 <sup>1</sup> H- <sup>1</sup> H COSY spectrum of <b>5</b> in CD <sub>3</sub> OD .....                          | 55 |
| Figure S57 NOESY spectrum of <b>5</b> in CD <sub>3</sub> OD .....                                                        | 56 |
| Figure S58 HRMS data of <b>5</b> .....                                                                                   | 56 |
| Figure S59 <sup>1</sup> H NMR spectrum of <b>11</b> in CD <sub>3</sub> OD .....                                          | 57 |
| Figure S60 <sup>13</sup> C NMR spectrum of <b>11</b> in CD <sub>3</sub> OD .....                                         | 57 |
| Figure S61 DEPT135 spectrum of <b>11</b> in CD <sub>3</sub> OD.....                                                      | 58 |
| Figure S62 HSQC spectrum of <b>11</b> in CD <sub>3</sub> OD .....                                                        | 58 |
| Figure S63 HMBC spectrum of <b>11</b> in CD <sub>3</sub> OD.....                                                         | 59 |
| Figure S64 <sup>1</sup> H- <sup>1</sup> H COSY spectrum of <b>11</b> in CD <sub>3</sub> OD .....                         | 59 |
| Figure S65 NOESY spectrum of <b>11</b> in CD <sub>3</sub> OD.....                                                        | 60 |
| Figure S66 HRMS data of <b>11</b> .....                                                                                  | 60 |
| Figure S67 LC-MS analysis of <i>S. sp</i> KIB-027 derived gene knock-out mutants, <i>AhbcG</i> and <i>AhbcGI</i> . ..... | 61 |
| Figure S68 SDS-PAGE analysis of the purified proteins HbcH (61.4 kDa), HbcF (33.0 kDa) and HbcG (41.4 kDa). .....        | 61 |
| Figure S69 <i>In vitro</i> assay of HbcF with <b>6</b> as substrate using HPLC method 2 .....                            | 62 |
| Figure S70 <i>In vitro</i> assay of HbcH with <b>9</b> , <b>3</b> , <b>2</b> and <b>10</b> as substrates. ....           | 63 |
| Figure S71 Chemical synthesis of tiglyl-CoA and angelyl-CoA.....                                                         | 64 |
| Figure S72 <i>In vitro</i> assay of HbcG with <b>3</b> , <b>6</b> and <b>9</b> as substrates. ....                       | 64 |
| Figure S73 <i>In vitro</i> assay of HbcF with <b>10</b> , <b>7</b> , <b>3</b> and <b>8</b> as substrates.....            | 65 |
| Figure S74 <i>In vitro</i> assay of HbcH with <b>9</b> as substrate and various acyl donors .....                        | 66 |
| Figure S75 Mass spectra for <b>12-19</b> and the putative structures of these compounds.....                             | 67 |
| Figure S76 <i>In vitro</i> assay of the hydrolytic activity of HbcH with <b>1</b> as substrate.....                      | 68 |
| Figure S77 <i>In vitro</i> assay of the hydrolytic activity of HbcH with <b>5</b> as substrate.....                      | 69 |
| Figure S78 <i>In vitro</i> assay of the hydrolytic activity of HbcH with <b>8</b> as substrate.....                      | 70 |
| Figure S79 <i>In vitro</i> assay of the hydrolytic activity of HbcH with <b>6</b> as substrate.....                      | 71 |

|                                                                                                                                                                       |    |
|-----------------------------------------------------------------------------------------------------------------------------------------------------------------------|----|
| Figure S80 <i>In vitro</i> assay of the hydrolytic activity of HbcH with <b>7</b> as substrate.....                                                                   | 71 |
| Figure S81. HPLC analysis method 3 and MS data of <i>S. sp.</i> L-9-10 wild type, <i>Δher10</i> mutant, <i>Δher10</i> mutant complementation fermentation broth ..... | 72 |
| Figure S82. SDS-PAGE analysis of the purified protein Her9 (61.0 kDa) .....                                                                                           | 72 |
| Figure S83. <i>In vitro</i> assay of Her8, Her10 with compound <b>9</b> as substrate using HPLC analysis method 4.....                                                | 73 |
| Figure S84. <i>In vitro</i> assay of Her9 with compound <b>9</b> as substrate using HPLC analysis method 4.....                                                       | 73 |
| Figure S85. <i>In vitro</i> assay of Her9 with compounds <b>2</b> and <b>10</b> as substrate using HPLC analysis method 3.....                                        | 74 |
| Figure S86. <i>In vitro</i> assay of Her8, Her10 with compound <b>6</b> as substrate using HPLC analysis method 3.....                                                | 74 |
| Figure S87. <i>In vitro</i> assay of Her10 with compound <b>8</b> as substrate using HPLC analysis method 3.....                                                      | 75 |
| Figure S88. HPLC and MS analysis of feeding result for <i>in vivo</i> Her11 activity .....                                                                            | 75 |

# Experimental Procedures

## 1. Materials

General chemicals, media, enzymes and other molecular biological reagents were purchased from commercial sources. Specific bacterial strains and plasmids used in this study were summarized in Table S8, PCR primers were listed in Table S9.

## 2. Production and analysis of herbicidins and aureonuclemycin

*Streptomyces* sp. KIB-027 wild type and the mutants, as well as *S. lividans-anmBCDE* were cultured on MS agar plate (add 25 µg/mL apramycin for *S. lividans-anmBCDE*) at 30°C for 7 days. For fermentation, a piece of spore-containing medium of about 1 cm<sup>2</sup> were seeded into a 250 mL flask containing 50 mL of the fermentation medium (dextrin 4%, tomato paste 0.75%, NZ amine A 0.25%, yeast extract 0.5%, pH = 7.0) and incubated at 30°C, 220 rpm for 4 days. The fermentation broth was centrifuged to remove the precipitate and the supernatant was used for HPLC and HPLC-MS analysis. HPLC was performed using a reverse-phase column (Grace Alltima, C18, 5 µm, 4.6 × 250 mm) with UV detection at 260 nm under the following program: gradient elution of mobile phase A (H<sub>2</sub>O supplemented with 0.1% formic acid) and mobile phase B (CH<sub>3</sub>OH supplemented with 0.1% formic acid) using a flow rate of 0.8 mL/min: 0-4 min, 5% phase B; 4-10 min, 5%-20% phase B; 10-20 min, 20%-80% phase B; 20-25 min, 80% phase B; 25-30 min, 80%-5% phase B.

*Streptomyces* sp. L-9-10 wild type and *Aher10* mutant were cultured on ISP4 agar at 30 °C plate for 5 days. For fermentation, a piece of colony-containing medium about 1 cm<sup>2</sup> was seeded into a 125 mL Erlenmeyer flask containing 20 mL of TSB (tryptic soy broth) medium and this seeding culture was incubated at 28 °C, 220 rpm for 3 days. Then 1 mL of the resulting culture was seeded into 20 mL of the fermentation medium (0.5% yeast extract, 0.5% malt extract, 1.5% soytone, 1% glucose, 0.3% sodium chloride, 1.5% glycerol, and 2% 3-morpholinopropane-1-sulfonic acid (MOPS) buffer at pH 7). This production culture was incubated at 28 °C, 220 rpm for 4 days. For HPLC sample preparation, 1 mL of the fermentation broth was centrifuged (15,000 g, 10 min) to pellet the cellular material and 0.5 mL of the supernatant was extracted with 0.5 mL *n*-butanol.

The *n*-butanol extract was evaporated under reduced pressure. The dried material was resuspended in 0.1 mL H<sub>2</sub>O and filtered by Nanosep (Pall, 10K) spin filter before analysis. HPLC was performed using a C18 column (Agilent, C18, 5 μm, 4.6 × 250 mm) with UV detection at 260 nm and the samples were eluted with mobile phase A (0.1% formic acid in water), and mobile phase B (0.1% formic acid in acetonitrile) using a flow rate of 1 mL/min: 0-5 min, 12.5% phase B; 5-20 min, 12.5-50% phase B; 20-22 min, 50%-80% phase B, 27-30 min, 80-12.5% phase B.

### **3. Identifications of the gene clusters and sequence analyses**

Genomic sequencing of *Streptomyces* sp. KIB-027 and *S. aureus* var. *suzhouensis* was performed by BGI-Shenzhen. The gene cluster for herbicidins (*hbc*) was found from the genomic sequence of *Streptomyces* sp. KIB-027 using O-methyltransferase and cytochrome P450 monooxygenase as query sequences for local BLAST search. The gene cluster for aureonuclemycin (*anm*) was found from the genomic sequence of *S. aureus* var. *suzhouensis* using *hbcE* as a query sequence for local BLAST search. The functions of the genes in *hbc* and *anm* were predicted by BLAST analyses in NCBI database.

### **4. Heterologous expression of *anm* cluster in *S. lividans***

The *anmB-C-D-E* gene locus was amplified by PCR with genomic DNA of *S. aureus* var. *suzhouensis* as a template using the primers *anmBE-For* and *anmBE-Rev* (Table S9). The PCR product was purified and ligated to pMD19-T simple vector by T-A ligation. The *HindIII/XbaI* fragment of the gene cassette was cloned into the *EcoRI/XbaI* sites of pSET152 with an *EcoRI/HindIII* fragment of the *ermEp\** promoter to yield the heterologous expression plasmid pSET-*anmBCDE*. This vector can be specifically integrated at the *attP* attachment site of *S. lividans*. Plasmid pSET-*anmBCDE* and the control plasmid pSET152 were transferred into *E. coli* S17-1 and then introduced into *S. lividans* through conjugation respectively. Apramycin resistant exconjugants were selected as the heterologous expression strain *S. lividans-anmBCDE* and the control strain *S. lividans-pSET152*, and the genotype of *S. lividans-anmBCDE* was verified by PCR with primers *anmBE-For* and *anmBE-Rev*.

### **5. Construction of gene deletion mutants of *S. sp.* KIB-027**

For *hbcA* inactivation, a 1.8 kb *HindIII/XbaI* fragment (primers *hbcA-L-For* and *hbcA-L-Rev*) and a 1.8 kb *XbaI/EcoRI* fragment (primers *hbcA-R-For* and *hbcA-R-Rev*) were cloned into the *HindIII/EcoRI* sites of the plasmid pKC1139 to generate the *hbcA* deletion plasmid, pKC1139-*hbcA*.

For *hbcF* inactivation, a 1.8 kb *HindIII/XbaI* fragment (primers *hbcF-L-For* and *hbcF-L-Rev*) and a 1.8 kb *XbaI/EcoRI* fragment (primers *hbcF-R-For* and *hbcF-R-Rev*) were cloned into the *HindIII/EcoRI* sites of the plasmid pKC1139 to generate the *hbcF* deletion plasmid, pKC1139-*hbcF*.

For *hbcG* inactivation, a 1.8 kb *HindIII/XhoI* fragment (primers *hbcG-L-For* and *hbcG-L-Rev*) and a 1.8 kb *XhoI/EcoRI* fragment (primers *hbcG-R-For* and *hbcG-R-Rev*) were cloned into the *HindIII/EcoRI* sites of the plasmid pKC1139 to generate the *hbcG* deletion plasmid, pKC1139-*hbcG*.

For *hbcH* inactivation, a 1.8 kb *HindIII/XbaI* fragment (primers *hbcH-L-For* and *hbcH-L-Rev*) and a 1.8 kb *XbaI/EcoRI* fragment (primers *hbcH-R-For* and *hbcH-R-Rev*) were cloned into the *HindIII/EcoRI* sites of the plasmid pKC1139 to generate the *hbcH* deletion plasmid, pKC1139-*hbcH*.

For *hbcI* inactivation, a 1.6 kb *HindIII/XhoI* fragment (primers *hbcI-L-For* and *hbcI-L-Rev*) and a 1.6 kb *XhoI/XbaI* fragment (primers *hbcI-R-For* and *hbcI-R-Rev*) were cloned into the *HindIII/XbaI* sites of the plasmid pKC1139 to generate the *hbcI* deletion plasmid, pKC1139-*hbcI*.

For *hbcG* and *hbcI* double inactivation, the 1.6 kb *HindIII/XhoI* fragment (primers *hbcI-L-For* and *hbcI-L-Rev*) and the 1.8 kb *XhoI/EcoRI* fragment (primers *hbcG-R-For* and *hbcG-R-Rev*) were cloned into the *HindIII/EcoRI* sites of the plasmid pKC1139 to generate the *hbcGI* deletion plasmid, pKC1139-*hbcGI*.

The resulting plasmids were introduced into *Streptomyces* sp. KIB-027 through conjugation respectively, and apramycin-resistant exconjugants were selected at 30°C. These exconjugants were first grown in MS plates with apramycin at 37 °C to obtain single-crossover mutants, which were further inoculated at 30 °C in TSB media without apramycin to generate the apramycin-sensitive clones. The double-crossover mutants were selected by PCR analyses using the primers listed in Table S9 (*hbcA-v-For* and *hbcA-v-Rev* for *hbcA* mutants, *hbcF-v-For* and *hbcF-v-Rev* for *hbcF* mutants, *hbcG-v-For* and *hbcG-v-Rev* for *hbcG* mutants, *hbcH-v-For* and

hbcH-v-Rev for hbcH mutants, hbcI-v-For and hbcI-v-Rev for hbcI mutants, hbcGI-v-For and hbcGI-v-Rev for hbcGI mutants). The resulting gene deletion mutants for each gene are shown in Table S8.

## 6. The *her10* deletion and complementation of *S. sp. L-9-10*

For *her10* in-frame deletion, a 2.1 kb *NdeI/BglIII* fragment (primers her10-L-For and her10-L-Rev) and a 2.1 kb *BglIII/HindIII* fragment (primers her10-R-For and her10-R-Rev) were cloned into the *NdeI/HindIII* sites of the plasmid pYH7 to generate the *her10* deletion plasmid, pYH7-her10.

The resulting plasmid was introduced into *S. sp. L-9-10* through conjugation on ISP4 plate, and apramycin-resistant conjugants were selected at 30 °C. These conjugants were first grown on ISP4 plate with 50 µg/mL apramycin to obtain single-crossover mutants, which were further incubated on ISP4 plate without apramycin to generate apramycin-sensitive clones. The double-crossover mutants were selected by PCR analysis using the primers listed in Table S9 (her10-v-For and her10-v-Rev).

For *Δher10* mutant complementation, *her10* gene of *S. sp. L-9-10* was amplified by PCR using the primer listed in Table S9 (her10-139-For and her10-139-Rev). The PCR product was ligated into pIB139 digested with *NdeI* using Gibson assembly. The resulting plasmid was introduced into *S. sp. L-9-10* through conjugation to generate *Δher10: her10*.

## 7. Isolation of herbicidins and aureonuclemycin

*S. sp. KIB-027* wild type and the gene deletion mutants, as well as the *anm* expression strain *S. lividans-anmBCDE* were fermented on a larger scale using the same culture procedure as described above.

To isolate compounds **1**, **2**, **7** and **10** from *S. sp. KIB-027* wild type, a total of 3 L of culture was prepared for fermentation. The fermentation broth was centrifuged at 5000 rpm for 20 min. Then the supernatant was collected and 300 g of macro resin HP20 was added, followed by shaking at room temperature for 1 hr. The HP20 was applied to a column and eluted with H<sub>2</sub>O/CH<sub>3</sub>OH (90/10, 50/50, 10/90, 0/100). Four compounds were included in the eluate of H<sub>2</sub>O/CH<sub>3</sub>OH (10/90), which was evaporated to 30 mL and subjected to a new HP20 column eluted with H<sub>2</sub>O/CH<sub>3</sub>OH



(50/50, 10/9) to yield corresponding fractions. Fractions containing target components were evaporated to about 5 mL and performed HPLC semi-preparation over a 30 min gradient program. The program for compound **10**: T = 0 min, 20% B; T = 4 min, 20% B; T = 25 min, 70% B; T = 30 min, 20% B; (A = H<sub>2</sub>O with 0.1 % TFA, B = CH<sub>3</sub>OH, Flow rate = 3 mL/min). The program for compound **1, 2, 7**: T = 0 min, 35% B; T = 4 min, 35% B; T = 25 min, 85% B; T = 30 min, 35% B; (A = H<sub>2</sub>O with 0.1 % TFA, B = CH<sub>3</sub>OH, Flow rate = 3 mL/min). Finally, 11 mg of **1**, 18 mg of **2**, 25 mg of **7** and 8 mg of **10** were obtained.

To isolate compound **9** from *S. lividans-anmBCDE*, a total of 2 L of culture was prepared for fermentation. The fermentation broth was centrifuged at 5000 rpm for 20 min. An equal volume of methanol was added to the supernatant, and a large amount of precipitate was removed by centrifugation. The supernatant was concentrated to half volume and an equal volume of methanol was added again. The above experiments were repeated until the supernatant volume was concentrated to 50 mL in H<sub>2</sub>O/CH<sub>3</sub>OH (50/50). The crude concentrate was subjected to silica gel column (100-200 mesh) and eluted with H<sub>2</sub>O/CH<sub>3</sub>OH (50/50, 0/100). Fractions containing **9** were evaporated to about 3 mL and performed HPLC semi-preparation over a 20 min gradient program: T = 0 min, 20% B; T = 6 min, 20% B; T = 15 min, 30% B; T = 17 min, 20% B; T = 20 min, 20% B; (A = H<sub>2</sub>O with 0.1 % TFA, B = CH<sub>3</sub>OH, Flow rate = 3 mL/min). Finally, 12 mg of **9** was obtained.

To isolate compound **6** from *S. sp. KIB-027-ΔhbcF*, a total of 2 L of culture was prepared for fermentation. To isolate compounds **8** and **11** from *ΔhbcG*, a total of 3 L of culture was prepared for fermentation. To isolate compound **3** from *ΔhbcH*, a total of 2 L of culture was prepared for fermentation. To isolate compound **5** from *ΔhbcI*, a total of 2 L of culture was prepared for fermentation. The separation of these compounds is similar to that of herbicidins in the wild type. The program for HPLC semi-preparation for these compounds: T = 0 min, 20% B; T = 4 min, 20% B; T = 20 min, 80% B; T = 25 min, 20% B; T = 30 min, 20% B; (A = H<sub>2</sub>O with 0.1 % TFA, B = CH<sub>3</sub>OH, Flow rate = 3 mL/min). Finally, about 10 mg of **6, 8, 3, 5** and 3 mg of **11** were obtained.

Isolation of compounds **1** and **2** from *S. sp. L-9-10* wild type was carried out as previously described.<sup>4</sup>

To isolate compounds **8** from *S. sp. L-9-10 Δher10* mutant, a 200 mL culture was prepared as

described above for fermentation. The fermentation broth was centrifuged at 4,000 g for 10 min. Then the supernatant was extracted by the same volume of EtOAc three times. The organic layers were combined and the solvent was evaporated to about 5 mL. HPLC semi-preparation was performed over a 30 min gradient program: T = 0 min, 10% B; T = 2 min, 10% B; T = 15 min 35% B; T = 17 min, 65 % B, T = 21 min, 65% B, T = 22 min, 10% B; (A = H<sub>2</sub>O with 0.1% formic acid, B = acetonitrile with 0.1% formic acid). Finally, 10 mg of **8** was obtained.

To isolate compound **5** from *Streptomyces scopuliridis* RB72 wild type, a 200 mL culture was similarly prepared, except that the production culture was harvested after two days of fermentation. Compound **5** was isolated using the same extraction and HPLC methods described above. Finally, about 0.3 mg of compound **5** was obtained.

## 8. Hydrolysis of herbicidin K

An aqueous reaction mixture of 1 mM herbicidin K (**8**) and 100 mM LiOH was incubated at room temperature for 3 hrs. The reaction was then neutralized with formic acid and the mixture was then purified using HPLC to yield compounds **6** and **9**.

## 9. Protein expression and purification

### Protein expression

The genes encoding individual proteins HbcF, HbcG, HbcH and HbcI were amplified by PCR from genomic DNA of *S. sp.* KIB-027 respectively. The primers for the amplification are listed in Table S9. The PCR products were confirmed by sequencing. Each gene was digested with *NdeI/HindIII* and ligated with pET28a to provide the plasmids for protein expression. For HbcF, HbcG and HbcH expression, plasmids pET28a-HbcF, pET28a-HbcG and pET28a-HbcH were transformed into *E. coli* BL21 (DE3), respectively. The cells were cultured in 1000 mL LB with 100 µg/mL kanamycin to an OD<sub>600</sub> of 0.6 and induced with 0.1 mM IPTG. Then the cells were cultured for 24 hrs at 16°C. For HbcI expression, expression plasmid pET28a-HbcI was transformed into *E. coli* BL21 (DE3). The cells were cultured in 500 mL LB with 100 µg/mL kanamycin to an OD<sub>600</sub> of 0.6 and followed by addition of 0.1 mM IPTG, 1 mM 5-aminolevulinic acid and 0.5 mM FeSO<sub>4</sub>. Then the cells were cultured for 24 hrs at 16°C.

Her8 and Her10 proteins encoded by *her8* and *her10* genes of *S. sp.* L-9-10 were obtained as

previously described.<sup>4</sup> The gene encoding Her9 was amplified by PCR from genomic DNA of *S. sp.* L-9-10. The primers for amplification are listed in Table S9 (her9-pro-For and her9-pro-Rev). The PCR product was digested with *NdeI/HindIII* and ligated with pET28b digested with the same restriction enzymes. The resulting plasmid was confirmed by sequencing. For Her9 expression, plasmid pET28b-Her9 was transformed into *E. coli* BL21 (DE3). The cells were cultured in 2,000 mL LB with 50 µg/mL kanamycin to an OD<sub>600</sub> of 0.5, followed by addition of 0.1 mM IPTG to induce protein expression. Then the cells were cultured for 24 hrs at 18 °C before purification.

#### **Purification:**

After 24 hours of incubation, cells were harvested by centrifugation (4, 000 rpm, 10 min) and resuspended in 30 mL of lysis buffer (50 mM Tris, pH 8.0, 10 mM imidazole, 500 mM NaCl). The cells are then lysed by ultra-sonication on ice. After centrifugation at 12, 000 rpm for 60 min, 3 mL of Ni-NTA resin was added to the supernatant and incubated at 4°C for 2 hrs. The Ni-NTA resin was collected by centrifugation (2, 000 rpm, 2 min) and eluted with 10 mL lysis buffer (50 mM Tris, pH 8.0, 10 mM imidazole, 500 mM NaCl). The resin was then eluted with elution buffers containing different concentrations of imidazole. The target protein was collected and concentrated to 2.5 mL and then exchanged into storage buffer (50 mM Tris-HCl, pH 7.5, 100 mM NaCl, 10% glycerol).

For Her9 purification, cells after 24 hrs of incubation were harvested by centrifugation (4,000 g, 10 min) and resuspended in 60 mL of lysis buffer (50 mM HEPES, pH 7.5, 10 mM imidazole, 150 mM NaCl, 20% glycerol). The cells are then lysed by ultra-sonication on ice. After centrifugation at 13,000 g for 60 min, 2 mL of Ni-NTA resin was added to the supernatant and incubated at 4 °C for 2 hrs. The mixture was packed into a column. The flowthrough was discarded, and the resin was washed by 10 mL of wash buffer (50 mM HEPES, pH 7.5, 20 mM imidazole, 150 mM NaCl, 20% glycerol) twice. Her9 protein was then eluted by 10 mL of elution buffer (50 mM HEPES, pH 7.5, 250 mM imidazole, 150 mM NaCl, 20% glycerol), dialyzed against storage buffer (50 mM HEPES, pH 7.5, 150 mM NaCl, 20% glycerol), and concentrated to 3 mL.

## **10. Chemical synthesis of tiglyl-CoA and angelyl-CoA**

The reactions were conducted under strictly anaerobic conditions. 8.0 mg of Tiglic acid (1 eq) was dissolved in 8 mL of oxygen-free THF and was transferred into the round-bottom flask

containing 31.2 mg of PyBOP (Benzotriazol-1-yl-oxytripyrrolidinophosphonium hexafluorophosphate) (1 eq) and 8.28 mg of  $K_2CO_3$  (1 eq), then 46 mg of CoASH (1 eq) was dissolved in 4 mL of oxygen-free  $H_2O$  and was added into the mixture described above. After stirring at room temperature for 3.5 hours, the reaction solvent was removed by rotary evaporation and the residue was dissolved in 4 mL of  $H_2O$ , Tiglic-CoA was detected when this aqueous solution was subjected to LC-MS with reversed-phase column (Synchronis aQ Dim, 250×4.6 mm). The column was equilibrated with 97% solvent A ( $H_2O$  + 1% TFA)/3% solvent B ( $CH_3CN$  + 1% TFA) for 5 min, the gradient of elution was as follows: 0-5 min: 97% A/3% B, 5-20 min: a linear gradient increase to 80% A/20% B, 20-22 min: a linear gradient increase to 40% A/60% B, 22-24 min: a linear gradient increase to 10% A/90% B, 24-26 min: maintain at the ratio of 10% A/90% B, 26-28 min: a linear gradient decrease to 97% A/3% B, 28-30 min: 97% A/3% B. Flow rate was of  $1\text{ mL}\cdot\text{min}^{-1}$  and detection wavelength was 210 nm. LC-MS of  $C_{26}H_{43}N_7O_{17}P_3S^+$  ( $[M]^+$ ), calculated 402.1633, found 402.1633. The produced Tiglic-CoA dissolved in  $H_2O$  was then subjected to reverse silica gel column chromatography for purification by elution with the mixture of  $H_2O$  and MeOH in different ratios, the ratio of  $H_2O$ : MeOH gradient changes as 8:2→6:4→4:6→2:8→100% MeOH, the eluent was detected by LC-MS and Tiglic-CoA was eluted during ratio of 6:4→4:6→2:8→100% MeOH. The eluent was then subjected to lyophilization to get 42 mg of Tiglic-CoA in white powder.

Synthesis and purification of Angelic-CoA was conducted in the similar procedure.

## 11. Biochemical assays

For HbcF and HbcG-catalyzed methylation reactions, assays were performed in 50  $\mu\text{L}$  reaction mixtures containing 50 mM PBS (pH 7.0), 2 mM SAM, 0.5 mM substrates. The reactions were initiated by adding 10  $\mu\text{M}$  HbcF or HbcG. The enzymatic reactions were carried out at 30  $^\circ\text{C}$  for 8 hrs and quenched with 100  $\mu\text{L}$  MeOH and stored at -80  $^\circ\text{C}$  until they would be subjected to analyses. After centrifugation at 12,000 rpm for 10 min, the protein precipitate was removed and the supernatant was subjected to HPLC analysis using an analytic C18 column (Acclaim 120 C18, 5  $\mu\text{m}$ , 4.6 × 250 mm) with UV detection at 260 nm under the following program: gradient elution of mobile phase A ( $H_2O$  supplemented with 0.1% formic acid) and mobile phase B ( $CH_3OH$ ) using a flow rate of 0.8 mL/min: 0-4 min, 4% phase B; 4-25 min, 4%-80% phase B; 25-28 min, 80%

phase B; 28-30 min, 4% phase B. For HPLC-ESI-MS analysis, conditions are the same as HPLC analysis, and the extracted ion chromatograms (EICs) of molecular weight for the compounds were shown in the results.

For HbcH-catalyzed acylation reactions, assays were performed in 50  $\mu$ L reaction mixtures containing 50 mM PBS (pH 7.0), 3 mM acyl donors, 0.5 mM substrates. The reactions were initiated by adding 10  $\mu$ M HbcH. The enzymatic reactions were carried out at 30  $^{\circ}$ C for 8 hrs and quenched with 100  $\mu$ L MeOH and stored at -80  $^{\circ}$ C until they would be subjected to analyses. After centrifugation at 12,000 rpm for 10 min, the protein precipitate was removed and the supernatant was subjected to HPLC and LC-MS analysis using the same conditions as above.

For HbcH-catalyzed hydrolytic reactions, assays were performed in 50  $\mu$ L reaction mixtures containing 50 mM PBS (pH 7.0), 0.5 mM substrates. The reactions were initiated by adding 10  $\mu$ M HbcH, or 10  $\mu$ M HbcH and 2 mM HSCoA, or protein storage buffer. The enzymatic reactions were carried out at 30  $^{\circ}$ C for 8 hrs and quenched with 100  $\mu$ L MeOH and stored at -80  $^{\circ}$ C until they would be subjected to analyses. After centrifugation at 12,000 rpm for 10 min, the protein precipitate was removed and the supernatant was subjected to HPLC and LC-MS analysis using the same conditions as above.

For Her8 and Her10-catalyzed methylation reactions, assays were performed in 100  $\mu$ L reaction mixture containing 50 mM Tris-HCl (pH 7.5), 0.5 mM SAM, 0.1 mM substrates, and 1  $\mu$ M enzyme. The reaction was carried out at room temperature (about 24  $^{\circ}$ C) for 24 hrs, and the enzyme was subsequently removed using a 10 kD MW cut off spin filter. The filtrate were then subjected to HPLC analysis using a reverse-phase column (Agilent, C18, 5  $\mu$ m, 4.6  $\times$  250 mm) with a two-phase elution system of mobile phase A (0.1% formic acid in water), and mobile phase B (0.1% formic acid in acetonitrile) using a flow rate of 1 mL/min: 0-5 min, 12.5% phase B; 5-20 min, 12.5-50% phase B; 20-22 min, 50-80% phase B; 27-30 min, 80-12.5% phase B. When compound **9** was used as the substrate, HPLC analysis was carried out using a flow rate of 1 mL/min: 0-5 min, 5% phase B; 5-20 min, 5-50% phase B; 20-22 min, 50-80% phase B; 27-30 min, 80-5% phase B.

For Her9-catalyzed acylation reactions, assays were performed in 100  $\mu$ L reaction mixture containing 50 mM Tris-HCl (pH 7.5), 1 mM tiglyl-CoA, 0.1 mM substrates, and 1  $\mu$ M Her9. The

reactions were carried out at 30 °C for 16 hrs. Workup and analysis were the same as described above.

## 12. Feeding study analysis of Her11 activity

For pIB139-her11 construction, *her11* gene of *S. sp. L-9-10* was amplified by PCR using the primer listed in Table S9 (her11-139-For and her11-139-Rev). The PCR product was ligated into pIB139 digested with *NdeI* using Gibson assembly. pIB139 empty vector and pIB139-her11 was introduced into *Streptomyces albus* J1074 by conjugation to generate J1074-pIB139 and J1074-pIB139-her11, respectively. For feeding study, 100 µL J1074-pIB139-her11 mycelia cell stock was seeded into 20 mL of TSB medium, and the culture was incubated at 28 °C, 220 rpm for 3 days. Then 0.3 mL of the seeding culture was used to inoculate 5 mL of the fermentation medium (0.5% yeast extract, 0.5% malt extract, 1.5% soytone, 1% glucose, 0.3% sodium chloride, 1.5% glycerol, and 2% 3-morpholinopropane-1-sulfonic acid (MOPS) buffer at pH 7), and cultured at 28 °C, 220 rpm for 3 days. Herbicidin F was subsequently added to the cultures to a final concentration of 0.05 mM, and the cultures were incubated at 28 °C, 220 rpm for additional 2 days. The resulting cultures were prepared for HPLC analysis using the same method as described for *S. sp. L-9-10* wild type production analysis. Control with J1074-pIB139 was performed in parallel.

## References

1. Sambrook, J.; Fritsch, E. F.; Maniatis, T. *Molecular cloning: a laboratory manual*, 2nd edn. Cold Spring Harbor Laboratory, New York., 1989.
2. Bierman, M.; Logan, R.; O'Brien, K.; Seno, T.; Rao, N.; Schoner, B. E. *Gene*, **1992**, 116, 43–49.
3. Kieser, T.; Bibb, M. J.; Buttner, M. J.; Chater, K. F.; Hopwood, D. A. *Practical Streptomyces Genetics*, The John Innes Foundation, Norwich, UK, 2001.
4. Lin, G.-M.; Romo, A. J.; Liem, P. H.; Chen, Z.; Liu, H.-w. *J. Am. Chem. Soc.*, **2017**, 139, 16450–16453

## Supplementary Tables:

Table S1 NMR data of **10** in CD<sub>3</sub>OD (500 MHz for <sup>1</sup>H NMR and 125 MHz for <sup>13</sup>C NMR)

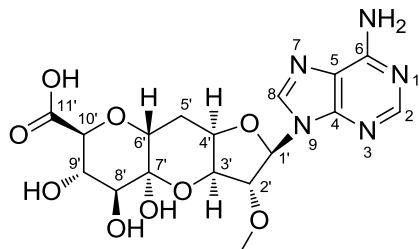

Herbicidin M **10**

| No.                 | $\delta_C$ [ppm] | $\delta_H$ [ppm] | HSQC                | COSY          | HMBC                                | NOESY                                   |
|---------------------|------------------|------------------|---------------------|---------------|-------------------------------------|-----------------------------------------|
| 2                   | 146.65           | 8.38 (s)         | C-2                 | -             | C-4, C-6                            |                                         |
| 4                   | 149.77           | -                | -                   | -             | -                                   |                                         |
| 5                   | 119.37           | -                | -                   | -             | -                                   |                                         |
| 6                   | 152.53           | -                | -                   | -             | -                                   |                                         |
| 8                   | 144.84           | 8.88 (s)         | C-8                 | -             | C-4, C-5                            | H-1', H-2', H-6'                        |
| 1'                  | 89.34            | 6.21 (d)         | C-1'                | H-2'          | C-4, C-8, C-2'                      | H-2', H-4', H-8,<br>2'-OCH <sub>3</sub> |
| 2'                  | 91.96            | 4.02 (s)         | C-2'                | H-1'          | 2'-OCH <sub>3</sub> , C-3',<br>C-4' | H-1', H-8, H-3',<br>2'-OCH <sub>3</sub> |
| 3'                  | 74.08            | 4.46 (d)         | C-3'                | H-4'          | C-1', C-4'                          | H-2', H-4',<br>2'-OCH <sub>3</sub>      |
| 4'                  | 80.19            | 4.45 (m)         | C-4'                | H-3',<br>H-5' | C-6'                                | H-5', H-3', H-1'                        |
| 5'                  | 26.32            | 2.25-2.20 (m)    | C-5'                | H-4',<br>H-6' | C-4', C-6', C-7'                    | H-4', H-6',                             |
| 6'                  | 65.23            | 4.66 (dd)        | C-6'                | H-5'          |                                     | H-5', H-8                               |
| 7'                  | 94.75            | -                | -                   | -             | -                                   | -                                       |
| 8'                  | 71.42            | 3.71 (d)         | C-8'                | H-9'          | C-7', C-10'                         | H-9'                                    |
| 9'                  | 73.74            | 4.38 (dd)        | C-9'                | H-8'          | C-8', C-7'                          | H-8', H-10'                             |
| 10'                 | 78.01            | 4.31 (br s)      | C-10'               |               | C-6', C-8',<br>C-9', C-11'          | H-9'                                    |
| 11'                 | 173.08           | -                | -                   | -             | -                                   |                                         |
| 2'-OCH <sub>3</sub> | 58.42            | 3.47 (s)         | 2'-OCH <sub>3</sub> | -             | C-2'                                | H-1', H-2', H-3',                       |

**Table S2 Predicted functions of genes in herbicidin (*hbc*) biosynthetic gene cluster and the comparison with aureonuclemycin (*anm*) cluster**

| Gene in <i>hbc</i> | Amino acids | Protein homolog by BLAST                                                                | Predicted function        | Gene in <i>anm</i> (size, identity) |
|--------------------|-------------|-----------------------------------------------------------------------------------------|---------------------------|-------------------------------------|
| <i>hbcR1</i>       | 215         | TetR family transcriptional regulator                                                   | Regulator                 |                                     |
| <i>hbcR2</i>       | 43          | XRE family transcriptional regulator                                                    | Regulator                 |                                     |
| <i>hbcR3</i>       | 103         | XRE family transcriptional regulator                                                    | Regulator                 |                                     |
| <i>hbcJ</i>        | 123         | short-chain dehydrogenase (incomplete)                                                  | Unknown                   |                                     |
| <i>hbcA</i>        | <b>328</b>  | <b>ketoacyl-ACP synthase III</b>                                                        | <b>acyltransferase</b>    |                                     |
| <i>hbcB</i>        | <b>552</b>  | <b>hypothetical protein / S-adenosyl-L-homocysteine (SAH) hydrolase</b>                 | <b>oxidoreductase</b>     | <b><i>anmB</i> (556, 56%)</b>       |
| <i>hbcC</i>        | <b>365</b>  | <b>ABC transporter ATP-binding protein / oxidoreductase, NAD-binding domain protein</b> | <b>oxidoreductase</b>     | <b><i>anmC</i> (366, 48%)</b>       |
| <i>hbcE</i>        | <b>435</b>  | <b>B12-dependent radical SAM enzyme</b>                                                 | <b>skeleton formation</b> | <b><i>anmE</i> (421, 56%)</b>       |
| <i>hbcD</i>        | <b>375</b>  | <b>gfo/Idh/MocA family oxidoreductase</b>                                               | <b>oxidoreductase</b>     | <b><i>anmD</i> (372, 62%)</b>       |
| <i>hbcF</i>        | <b>285</b>  | <b>SAM-dependent methyltransferases</b>                                                 | <b>methyltransferase</b>  |                                     |
| <i>hbcH</i>        | <b>544</b>  | <b>serine hydrolase</b>                                                                 | <b>hydrolase</b>          |                                     |
| <i>hbcG</i>        | <b>368</b>  | <b>SAM-dependent methyltransferases</b>                                                 | <b>methyltransferase</b>  |                                     |
| <i>hbcI</i>        | <b>375</b>  | <b>cytochrome P450</b>                                                                  | <b>hydroxylase</b>        |                                     |
| <i>hbcR4</i>       | 940         | transcriptional regulator, LuxR family                                                  | Regulator                 |                                     |
| <i>hbcR5</i>       | 420         | silent information regulator protein Sir2                                               | Regulator                 |                                     |



**Table S3 NMR data of 6 in CD<sub>3</sub>OD (500 MHz for <sup>1</sup>H NMR and 125 MHz for <sup>13</sup>C NMR)**

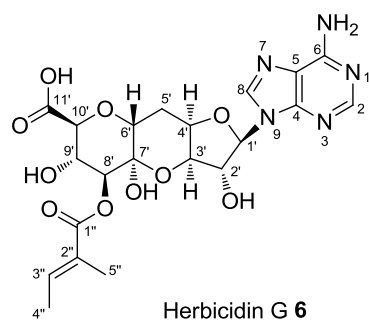

| No.             | $\delta_C$ [ppm] | $\delta_H$ [ppm] | HSQC  | COSY                                           | HMBC                              | NOESY                                                 |
|-----------------|------------------|------------------|-------|------------------------------------------------|-----------------------------------|-------------------------------------------------------|
| 2               | 153.90           | 8.19 (s)         | C-2   |                                                | C-4, C-6                          |                                                       |
| 4               | 150.64           | -                |       |                                                |                                   |                                                       |
| 5               | 119.80           | -                |       |                                                |                                   |                                                       |
| 6               | 157.37           | -                |       |                                                |                                   |                                                       |
| 8               | 140.66           | 7.96 (s)         | C-8   |                                                | C-4, C-5                          | H-3'', H-5'', H-1',<br>H-2', H-6'                     |
| 1'              | 91.13            | 5.97 (d)         | C-1'  | H-2'                                           | C-4, C-8, C-2'                    | H-2', H-4', H-8                                       |
| 2'              | 82.61            | 4.33 (br d)      | C-2'  | H-1'                                           | C-3', C-1'                        | H-1', H-8                                             |
| 3'              | 77.86            | 4.33 (br d)      | C-3'  | H-4'                                           | C-2', C-4'                        | H-5' <sub>b</sub> , H-4'                              |
| 4'              | 78.94            | 4.46 (m)         | C-4'  | H-3', H-5' <sub>a</sub> ,<br>H-5' <sub>b</sub> | C-6'                              | H-5' <sub>a</sub> , H-5' <sub>b</sub> , H-3',<br>H-1' |
| 5' <sub>a</sub> | 26.66            | 2.34 (m)         | C-5'  | H-4', H-6',<br>H-5' <sub>b</sub>               | C-3', C-4', C-6',<br>C-7'         | H-5' <sub>b</sub> , H-4', H-6'                        |
| 5' <sub>b</sub> | 26.66            | 2.19 (m)         | C-5'  | H-4', H-6',<br>H-5' <sub>a</sub>               | C-6'                              | H-5' <sub>a</sub> , H-4'                              |
| 6'              | 66.12            | 4.63 (dd)        | C-6'  | H-5' <sub>a</sub> , H-5' <sub>b</sub>          | C-5'                              | H-5' <sub>a</sub> , H-3'', H-8                        |
| 7'              | 93.57            |                  |       |                                                |                                   |                                                       |
| 8'              | 72.04            | 4.99 (d)         | C-8'  | H-9'                                           | C-6', C-7', C-9',<br>C-10', C-1'' | H-9'                                                  |
| 9'              | 70.94            | 4.42 (dd)        | C-9'  | H-8', H-10'                                    | C-8', C-7'                        | H-8', H-10'                                           |
| 10'             | 79.35            | 4.25 (br s)      | C-10' | H-9'                                           | C-6', C-8', C-9',<br>C-11'        | H-9'                                                  |
| 11'             | 173.75           |                  |       |                                                |                                   |                                                       |
| 1''             | 168.04           |                  |       |                                                |                                   |                                                       |
| 2''             | 128.33           |                  |       |                                                |                                   |                                                       |
| 3''             | 141.98           | 6.84 (q)         | C-3'' | H-4''                                          | C-4'', C-5'', C-1''               | H-4'', H-6', H-8                                      |
| 4''             | 15.13            | 1.87 (m)         | C-4'' | H-3''                                          | C-2'', C-3''                      | H-3''                                                 |
| 5''             | 12.38            | 1.85 (m)         | C-5'' |                                                | C-1'', C-2'', C-3''               | H-8                                                   |

**Table S4 NMR data of 8 in CD<sub>3</sub>OD (500 MHz for <sup>1</sup>H NMR and 125 MHz for <sup>13</sup>C NMR)**

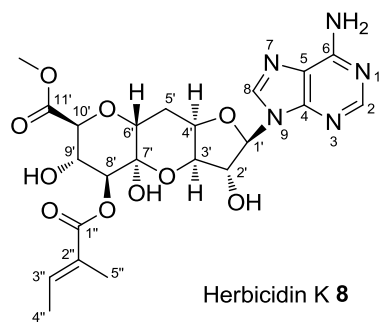

| No.                  | $\delta_C$ [ppm] | $\delta_H$ [ppm] | HSQC                 | COSY           | HMBC                       | NOESY                                     |
|----------------------|------------------|------------------|----------------------|----------------|----------------------------|-------------------------------------------|
| 2                    | 154.05           | 8.20 (s)         | C-2                  |                | C-4, C-6                   |                                           |
| 4                    | 150.68           | -                | -                    | -              | -                          |                                           |
| 5                    | 119.79           | -                | -                    | -              | -                          |                                           |
| 6                    | 157.41           | -                | -                    | -              | -                          |                                           |
| 8                    | 140.56           | 7.95 (s)         | C-8                  |                | C-4, C-5                   | H-3'', H-5'', H-1',<br>H-2', H-6'         |
| 1'                   | 91.05            | 5.98 (d)         | C-1'                 | H-2'           | C-4, C-8, C-2'             | H-2', H-4', H-8                           |
| 2'                   | 82.40            | 4.38 (d)         | C-2'                 | H-1'           | C-3', C-4'                 | H-1', H-8                                 |
| 3'                   | 77.86            | 4.35 (d)         | C-3'                 | H-4'           | C-1', C-2', C-4'           | H-5', H-4'                                |
| 4'                   | 78.90            | 4.49 (m)         | C-4'                 | H-3',<br>H-5'  | C-3', C-5', C-6'           | H-5', H-3', H-1'                          |
| 5'                   | 26.69            | 2.26 (m)         | C-5'                 | H-4',<br>H-6'  | C-3', C-4',<br>C-6', C-7'  | H-4', H-3', H-6',                         |
| 6'                   | 66.64            | 4.51 (dd)        | C-6'                 | H-5'           | C-5'                       | H-5', H-3'', H-8                          |
| 7'                   | 93.23            | -                | -                    | -              | -                          | -                                         |
| 8'                   | 71.90            | 4.98 (d)         | C-8'                 | H-9'           | C-7' C-9',<br>C-10', C-1'' | H-9'                                      |
| 9'                   | 70.45            | 4.31 (dd)        | C-9'                 | H-8',<br>H-10' | C-7', C-8',<br>C-10'       | H-8', H-10',<br>11'-OCH <sub>3</sub>      |
| 10'                  | 78.26            | 4.44 (br<br>s)   | C-10'                | H-9'           | C-6', C-8',<br>C-9', C-11' | H-9'                                      |
| 11'                  | 171.21           | -                | -                    | -              | -                          | -                                         |
| 1''                  | 167.19           | -                | -                    | -              | -                          | -                                         |
| 2''                  | 128.37           | -                | -                    | -              | -                          | -                                         |
| 3''                  | 141.69           | 6.65 (q)         | C-3''                | H-4''          | C-1'', C-4'',<br>C-5''     | H-4'', H-6', H-8,<br>11'-OCH <sub>3</sub> |
| 4''                  | 15.01            | 1.86 (d)         | C-4''                | H-3''          | C-2'', C-3''               | H-3''                                     |
| 5''                  | 12.29            | 1.84 (s)         | C-5''                | -              | C-1'', C-2'',<br>C-3''     | H-8, 11'-OCH <sub>3</sub>                 |
| 11'-OCH <sub>3</sub> | 52.65            | 3.59 (s)         | 11'-OCH <sub>3</sub> | -              | C-11'                      | H-9', H-3'', H-5''                        |

**Table S5 NMR data of 3 in CD<sub>3</sub>OD (500 MHz for <sup>1</sup>H NMR and 125 MHz for <sup>13</sup>C NMR)**

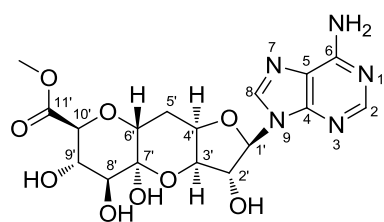

**Herbicidin C 3**

| No.                  | $\delta_C$ [ppm] | $\delta_H$ [ppm]  | HSQC                | COSY          | HMBC                       | NOESY                         |
|----------------------|------------------|-------------------|---------------------|---------------|----------------------------|-------------------------------|
| 2                    | 153.87           | 8.20 (s)          | H-2                 |               | C-4, C-5, C-6              |                               |
| 4                    | 150.37           | -                 |                     |               |                            |                               |
| 5                    | 119.38           | -                 |                     |               |                            |                               |
| 6                    | 157.15           | -                 |                     |               |                            |                               |
| 8                    | 142.56           | 8.68 (s)          | H-8                 |               | C-4, C-5                   | H-2', H-6'                    |
| 1'                   | 91.63            | 6.09 (d)          | H-1'                | H-2'          | C-4, C-8, C-2'             | H-2', H-4',<br>H-8            |
| 2'                   | 82.78            | 4.32 (br d)       | H-2'                | H-1'          | C-3', C-4'                 | H-1', H-8                     |
| 3'                   | 77.32            | 4.30 (d)          | H-3'                | H-4'          | C-1', C-2', C-4'           | H-5', H-4'                    |
| 4'                   | 79.72            | 4.53 (m)          | H-4'                | H-3',<br>H-5' | C-6'                       | H-5', H-3',<br>H-1'           |
| 5'                   | 26.52            | 2.24-2.21<br>(dd) | H-5'                | H-4',<br>H-6' | C-3', C-4', C-6',<br>C-7'  | H-4', H-3',<br>H-6',          |
| 6'                   | 65.57            | 4.65 (dd)         | H-6'                | H-5'          | C-5'                       | H-5', H-8                     |
| 7'                   | 94.51            | -                 |                     |               |                            | -                             |
| 8'                   | 71.21            | 3.69 (d)          | H-8'                | H-9'          | C-6', C-7', C-9',<br>C-10' | H-9'                          |
| 9'                   | 73.81            | 4.33 (dd)         | H-9'                | H-8'          | C-7', C-8'                 | H-8',<br>11'-OCH <sub>3</sub> |
| 10'                  | 78.01            | 4.35 (br, s)      | H-10'               |               | C-6', C-8', C-9',<br>C-11' |                               |
| 11'                  | 171.81           | -                 |                     |               |                            |                               |
| 11'-OCH <sub>3</sub> | 52.32            | 3.70 (s)          | 2'-OCH <sub>3</sub> |               | C-11'                      | H-9'                          |

**Table S6 NMR data of 5 in CD<sub>3</sub>OD (500 MHz for <sup>1</sup>H NMR and 125 MHz for <sup>13</sup>C NMR)**

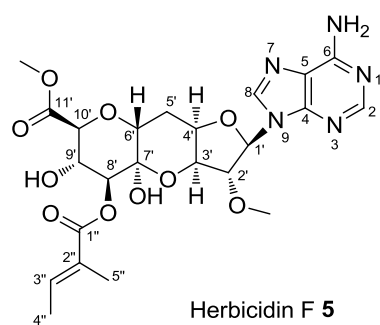

| No. | $\delta_C$ [ppm] | $\delta_H$ [ppm] | HSQC  | COSY           | HMBC                                 | NOESY                                     |
|-----|------------------|------------------|-------|----------------|--------------------------------------|-------------------------------------------|
| 2   | 154.04           | 8.22 (s)         | C-2   |                | C-4, C-6                             |                                           |
| 4   | 150.59           | -                | -     | -              | -                                    |                                           |
| 5   | 119.89           | -                | -     | -              | -                                    |                                           |
| 6   | 157.40           | -                | -     | -              | -                                    |                                           |
| 8   | 140.64           | 7.95 (s)         | C-8   |                | C-4, C-5                             | H-5'', H-1', H-2',<br>H-3', H-3'', H-6'   |
| 1'  | 88.87            | 6.05 (d)         | C-1'  | H-2'           | C-4, C-8, C-2'                       | H-2', H-4', H-8,<br>2'-OCH <sub>3</sub>   |
| 2'  | 91.83            | 4.07 (d)         | C-2'  | H-1'           | C-3', C-4',<br>2'-OCH <sub>3</sub>   | H-1', H-8, H-3',<br>2'-OCH <sub>3</sub>   |
| 3'  | 74.77            | 4.50 (d)         | C-3'  | H-4'           | C-1', C-2',<br>C-4'                  | H-5', H-2', H-4',<br>2'-OCH <sub>3</sub>  |
| 4'  | 79.06            | 4.40 (m)         | C-4'  | H-3',<br>H-5'  | C-6'                                 | H-5', H-3', H-1'                          |
| 5'  | 26.68            | 2.25-2.27<br>(m) | C-5'  | H-4',<br>H-6'  | C-3', C-4',<br>C-6', C-7'            | H-4', H-3', H-6'                          |
| 6'  | 66.72            | 4.52 (dd)        | C-6'  | H-5'           | C-5'                                 | H-5', H-3'', H-8                          |
| 7'  | 93.47            | -                | -     | -              | -                                    | -                                         |
| 8'  | 72.00            | 5.00 (d)         | C-8'  | H-9'           | C-6', C-7',<br>C-9', C-10',<br>C-1'' | H-9'                                      |
| 9'  | 70.60            | 4.33 (dd)        | C-9'  | H-8',<br>H-10' | C-7', C-8'                           | H-8', H-10'                               |
| 10' | 78.40            | 4.47 (br s)      | C-10' | H-9'           | C-6', C-8',<br>C-9', C-11'           | H-9'                                      |
| 11' | 171.41           | -                | -     | -              | -                                    | -                                         |
| 1'' | 167.35           | -                | -     | -              | -                                    | -                                         |
| 2'' | 128.58           | -                | -     | -              | -                                    | -                                         |
| 3'' | 141.88           | 6.70 (q)         | C-3'' | H-4''          | C-1'', C-4'',<br>C-5''               | H-4'', H-6', H-8,<br>11'-OCH <sub>3</sub> |

|                                 |        |             |                      |       |                        |                           |
|---------------------------------|--------|-------------|----------------------|-------|------------------------|---------------------------|
| 4''                             | 15.19  | 1.89 (br d) | C-4''                | H-3'' | C-2'', C-3''           | H-3''                     |
| 5''                             | 12.44  | 1.86 (m)    | C-5''                | -     | C-1'', C-2'',<br>C-3'' | H-8, 11'-OCH <sub>3</sub> |
| 2'-OCH <sub>3</sub>             | 58.52  | 3.41 (s)    | 2'-OCH <sub>3</sub>  | -     | C-2'                   | H-1', H-2', H-3'          |
| 11'-OCH <sub>3</sub>            | 52.87  | 3.62 (s)    | 11'-OCH <sub>3</sub> | -     | C-11'                  | H-5'', H-3''              |
| HCOOH<br>(Contam.)              | 165.36 | 8.13        | HCOOH                |       |                        |                           |
| CH <sub>3</sub> OH<br>(Contam.) | 50.00  | 3.35        | CH <sub>3</sub> OH   |       |                        |                           |



**Table S8 Strains and plasmids used in this study**

| Strains/Plasmids                                   | Characteristics*                                                                                                        | Reference/source           |
|----------------------------------------------------|-------------------------------------------------------------------------------------------------------------------------|----------------------------|
| <b>Strains</b>                                     |                                                                                                                         |                            |
| <i>E. coli</i> DH5 $\alpha$                        | Host for general cloning                                                                                                | Invitrogen                 |
| <i>E. coli</i> BL21 (DE3)                          | Host for protein expression                                                                                             | Invitrogen                 |
| <i>E. coli</i> S17-1                               | Donor strain for conjugation                                                                                            | 1                          |
| <i>E. coli</i> ET12567/pUZ8002                     | Donor strain for conjugation                                                                                            | Gift from Dr. Wenjun Zhang |
| <i>Streptomyces lividans</i> 1326                  | Host for heterologous expression of <i>anm</i> cluster                                                                  | 1                          |
| <i>Streptomyces</i> sp. KIB-027                    | Herbicidins-producing strain, wild type                                                                                 | This work                  |
| <i>Streptomyces aureus</i> var. <i>suzhouensis</i> | Aureonuclemycin-producing strain, wild type                                                                             | 2                          |
| <i>Streptomyces</i> sp. L-9-10                     | Herbicidin producing strain, wild type                                                                                  | 3                          |
| <i>Streptomyces. scopuliridis</i> RB72             | Herbicidin producing strain, wild type                                                                                  | 4                          |
| <i>S. lividans-anmBCDE</i>                         | Heterologous expression strain of <i>anm</i> cluster                                                                    | This work                  |
| <i>S. sp. <math>\Delta</math>hbcA</i>              | <i>hbcA</i> gene deletion mutant                                                                                        | This work                  |
| <i>S. sp. <math>\Delta</math>hbcF</i>              | <i>hbcF</i> gene deletion mutant                                                                                        | This work                  |
| <i>S. sp. <math>\Delta</math>hbcG</i>              | <i>hbcG</i> gene deletion mutant                                                                                        | This work                  |
| <i>S. sp. <math>\Delta</math>hbcH</i>              | <i>hbcH</i> gene deletion mutant                                                                                        | This work                  |
| <i>S. sp. <math>\Delta</math>hbcI</i>              | <i>hbcI</i> gene deletion mutant                                                                                        | This work                  |
| <i>S. sp. <math>\Delta</math>hbcGI</i>             | <i>hbcG</i> and <i>hbcI</i> double deletion mutant                                                                      | This work                  |
| <i>S. sp. <math>\Delta</math>her10</i>             | <i>her10</i> gene deletion mutant                                                                                       | This work                  |
| <i><math>\Delta</math>her10: her10</i>             | <i>her10</i> gene deletion mutant transformed with pIB139-her10                                                         | This work                  |
| <i>Streptomyces albus</i> J1074                    | Host for <i>her11</i> expression                                                                                        | Gift from Dr. Ben Shen     |
| J1074-pIB139                                       | <i>Streptomyces albus</i> J1074 with empty pIB139 vector                                                                | This work                  |
| J1074-pIB139-her11                                 | <i>Streptomyces albus</i> J1074 with pIB139-her11 plasmid                                                               | This work                  |
| <b>Plasmids</b>                                    |                                                                                                                         |                            |
| pMD19-T simple                                     | <i>Ap<sup>R</sup></i> , <i>E. coli</i> TA cloning vector                                                                | TaKaRa                     |
| pMD19-T                                            | <i>Ap<sup>R</sup></i> , <i>E. coli</i> TA cloning vector                                                                | TaKaRa                     |
| pET28a                                             | <i>Km<sup>R</sup></i> , protein expression vector in <i>E. coli</i>                                                     | Invitrogen                 |
| pET37b                                             | <i>Km<sup>R</sup></i> , protein expression vector in <i>E. coli</i>                                                     | Invitrogen                 |
| pET28b                                             | <i>Km<sup>R</sup></i> , protein expression vector in <i>E. coli</i>                                                     | Invitrogen                 |
| pIB139                                             | <i>Am<sup>R</sup></i> , <i>E. coli-Streptomyces</i> shuttle vector for gene complementation and heterologous expression | Gift from Dr. Yuhui Sun    |
| pYH7                                               | <i>Am<sup>R</sup></i> , <i>Ap<sup>R</sup></i> , <i>E. coli-Streptomyces</i> shuttle vector for gene inactivation        | 5                          |
| pSET152                                            | <i>Am<sup>R</sup></i> , <i>E. coli-Streptomyces</i> shuttle vector for gene complementation and heterologous expression | 1                          |
| pKC1139                                            | <i>Am<sup>R</sup></i> , <i>E. coli-Streptomyces</i> shuttle vector for gene inactivation                                | 1                          |
| pSET-anmBCDE                                       | pSET152 derivative for heterologous expression of <i>anmB-E</i>                                                         | This work                  |
| pKC1139-hbcA                                       | pKC1139 derivative for in-frame gene deletion of <i>hbcA</i>                                                            | This work                  |
| pKC1139-hbcF                                       | pKC1139 derivative for in-frame gene deletion of <i>hbcF</i>                                                            | This work                  |
| pKC1139-hbcG                                       | pKC1139 derivative for in-frame gene deletion of <i>hbcG</i>                                                            | This work                  |

|               |                                                                      |           |
|---------------|----------------------------------------------------------------------|-----------|
| pKC1139-hbcH  | pKC1139 derivative for in-frame gene deletion of <i>hbcH</i>         | This work |
| pKC1139-hbcI  | pKC1139 derivative for in-frame gene deletion of <i>hbcI</i>         | This work |
| pKC1139-hbcGI | pKC1139 derivative for gene deletion of <i>hbcG</i> and <i>hbcI</i>  | This work |
| pET28a-HbcF   | pET28a derivative containing <i>hbcF</i> gene for protein expression | This work |
| pET28a-HbcG   | pET28a derivative containing <i>hbcG</i> gene for protein expression | This work |
| pET28a-HbcH   | pET28a derivative containing <i>hbcH</i> gene for protein expression | This work |
| pET28a-HbcI   | pET28a derivative containing <i>hbcI</i> gene for protein expression | This work |
| pYH7-her10    | pYH7 derivative for in-frame gene deletion of <i>her10</i>           | This work |
| pIB139-her10  | pIB139 derivative for <i>S. sp. L-9-10 Δher10</i> complementation    | This work |
| pIB139-her11  | pIB139 derivative for heterologous expression of Her11               | This work |
| pET28b-Her9   | pET28b derivative containing <i>her9</i> gene for protein expression | This work |

Abbreviations: *Ap<sup>R</sup>*, ampicillin resistance; *Km<sup>R</sup>*, kanamycin resistance; *Am<sup>R</sup>*, apramycin resistance.

- [1] T. Kieser, M. J. Bibb, M. J. Buttner, K. F. Chater, D. A. Hopwood, *Practical Streptomyces Genetics*, The John Innes Foundation, Norwich, UK, 2001.
- [2] X. Dai, G. Li, Z. Wu, D. Lu, H. Wang, Z. Li, L. Zhou, X. Chen, W., Chen, *Chem. Abstr.* **1989**, 111, 230661f.
- [3] X. Chai, U. J. Youn, D. Sun, J. Dai, P. Williams, T. P. Kondratyuk, R. P. Borris, J. Davies, I. G. Villanueva, J. M. Pezzuto, L. C. Chang, *J. Nat. Prod.* **2014**, 77, 227–233
- [4] M. H. Farris, C. Duffy, R. H. Findlay, J. B. Olson, *Int. J. Syst. Evol. Microbiol.* **2011**, 61, 2112–2116
- [5] Y. Sun, X. He, J. Liang, X. Zhou, Z. Deng, *Appl. Microbiol. Biotechnol.* **2009**, 82, 303–310.

**Table S9 Primers used in this study**

| Primer     | Sequence                                         |
|------------|--------------------------------------------------|
| anmBE-For  | TAAAAGCTTATCGGGTCAATGCCAAGTCG ( <i>Hind</i> III) |
| anmBE-Rev  | TAATCTAGAGCCCAGTAGAGGAGGGAGAAGG ( <i>Xba</i> I)  |
| hbcA-L-For | AAGCTTGACATGCGCGCTGTCACAG ( <i>Hind</i> III)     |
| hbcA-L-Rev | TCTAGACCATTCCGACGTGGTGAGC ( <i>Xba</i> I)        |
| hbcA-R-For | TCTAGAAGCCACCCAGTCTTCCGGAG ( <i>Xba</i> I)       |
| hbcA-R-Rev | GAATTCGCTGGACCTCGTGATGGAC ( <i>Eco</i> RI)       |
| hbcA-v-For | TGATGACATCGTGGAGTTC                              |
| hbcA-v-Rev | GGGCTCATAGGGGTTGTAG                              |
| hbcF-L-For | AAGCTTTTCGACTGCGCTCAGCAAG ( <i>Hind</i> III)     |
| hbcF-L-Rev | TCTAGAGAACTGGACTCCCTCAAG ( <i>Xba</i> I)         |
| hbcF-R-For | TCTAGACCCGACCCGTTCTGTAGGTC ( <i>Xba</i> I)       |
| hbcF-R-Rev | GAATTCGGGTGATCGCCGAAGTGGAG ( <i>Eco</i> RI)      |
| hbcF-v-For | TCAGGATGTCGAGCGGTC                               |
| hbcF-v-Rev | GGACCGCATCGGCCTGCTG                              |
| hbcG-L-For | AAGCTTCTGTCTTGAGTGCGCAGAG ( <i>Hind</i> III)     |
| hbcG-L-Rev | CTCGAGCCCGAATACATGGTCGTC ( <i>Xho</i> I)         |
| hbcG-R-For | CTCGAGGATCGCGTGTGGAGATCC ( <i>Xho</i> I)         |
| hbcG-R-Rev | GAATTCGGAAGTGGACTCCCTCAAG ( <i>Eco</i> RI)       |
| hbcG-v-For | CGGTCGCCGTCGGCGGAGCACA                           |
| hbcG-v-Rev | ACACGGCCTTCAGCCAATACGCCT                         |
| hbcH-L-For | AAGCTTCCAGTACCTGGCAGATCGTC ( <i>Hind</i> III)    |
| hbcH-L-Rev | TCTAGATACGGACTATGGACGTCCGTG ( <i>Xba</i> I)      |
| hbcH-R-For | TCTAGACGGCGAGAACAGTGCCTAC ( <i>Xba</i> I)        |



|               |                                                            |
|---------------|------------------------------------------------------------|
| hbcH-R-Rev    | GAATTCGACGCCGTCCTGCTGTGCAC ( <i>EcoRI</i> )                |
| hbcH-v-For    | TCCGCGACTGAGTCATTC                                         |
| hbcH-v-Rev    | TCACCATGACCTCGAAAG                                         |
| hbcI-L-For    | AAGCTTAGCTCCCTCATCTCCATG ( <i>HindIII</i> )                |
| hbcI-L-Rev    | CTCGAGGCACTGGAAGAAGTGGTC ( <i>XhoI</i> )                   |
| hbcI-R-For    | CTCGAGGTGACGAGCCAGAGACGGT ( <i>XhoI</i> )                  |
| hbcI-R-Rev    | TCTAGACCTCGGCAAGGAGTACAC ( <i>XbaI</i> )                   |
| hbcI-v-For    | GAGAAATTACAGGCCAAAT                                        |
| hbcI-v-Rev    | GAAATCAGGCGGTTGCCGC                                        |
| hbcGI-v-For   | AACAGACGTCGCCCCGCCGGAAGA                                   |
| hbcGI-v-Rev   | ACACGGCCTTCAGCCAATACGCCT                                   |
| hbcF-pro-For  | CATATGAGCGACGTCATGCACTAC ( <i>NdeI</i> )                   |
| hbcF-pro-Rev  | AAGCTTTTACTCGAGGGACCTCTTGGCCAGAGTG ( <i>XhoI HindIII</i> ) |
| hbcG-pro-For  | CATATGACTCAGTCGCGGAATG ( <i>NdeI</i> )                     |
| hbcG-pro-Rev  | AAGCTTTTACTCGAGTTTGACGCCGACGACCATG ( <i>XhoI HindIII</i> ) |
| hbcH-pro-For  | CATATGGGGACGGTCCCCGCCAGGA ( <i>NdeI</i> )                  |
| hbcH-pro-Rev  | AAGCTTTTACTCGAGCACAAGGCCGAGATCGTGA ( <i>XhoI HindIII</i> ) |
| hbcI-pro-For  | CATATGCTCCCCTACCTCCAC ( <i>NdeI</i> )                      |
| hbcI-pro-Rev  | AAGCTTTTACTCGAGCCAGGACACCGGGAGAGTG ( <i>XhoI HindIII</i> ) |
| her10-L-For   | GGGCATATGAGCCGGTTCGGGGTGTCTGGTGG ( <i>NdeI</i> )           |
| her10-L-Rev   | GGGAGATCTGTCGATGATGGCGTGTGGAGATCCG ( <i>BglIII</i> )       |
| her10-R-For   | GGGAGATCTGCCAGTGCCGGGACTGGCTGACCG ( <i>BglIII</i> )        |
| her10-R-Rev   | GGGAAGCTTCACCGCAATCCGAACCTCGTGGTTA ( <i>HindIII</i> )      |
| her10-v-For   | CGGCAAGGAGTACACAGCATT                                      |
| her10-v-Rev   | ACACGCACCACGTCCGGTAC                                       |
| her9-pro-For  | CACCATATGATGGGGACGGCTCCCCGCCAG ( <i>NdeI</i> )             |
| her9-pro-Rev  | CACAAGCTTTCACGCAAGGCCGAGATCGT ( <i>HindIII</i> )           |
| her10-139-For | TTGGTAGGATCCACATATGACTCAGCCGCGGAATGACGCCG                  |
| her10-139-Rev | AGGATCCCCAACATACTACTTGACGCCGACGACCATGTAC                   |
| her11-139-For | TTGGTAGGATCCACATATGACGACCGACGAAGGCGAG                      |
| her11-139-Rev | AGGATCCCCAACATATCACCATGACACGGGGAGAGT                       |

## Supplementary Figures

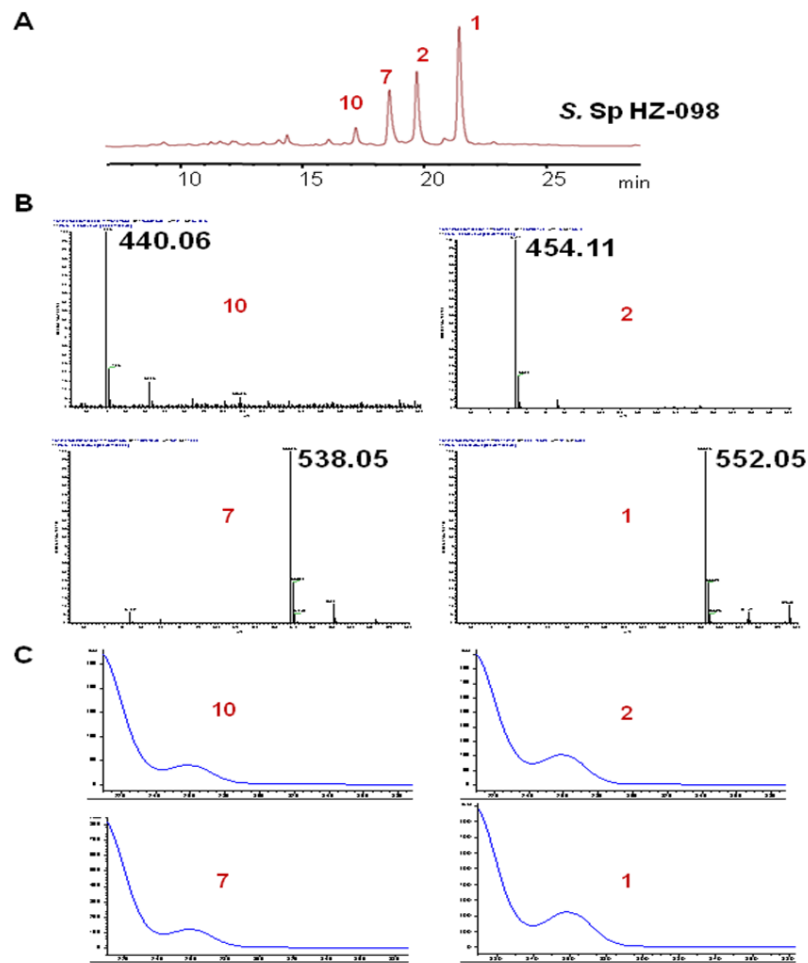

Figure S1 LC-MS analysis of *S. sp* KIB-027 fermentation broth.

A) HPLC profile; B) Mass spectra for compounds 1, 2, 7 and 10; C) UV spectra for compounds 1, 2, 7 and 10.

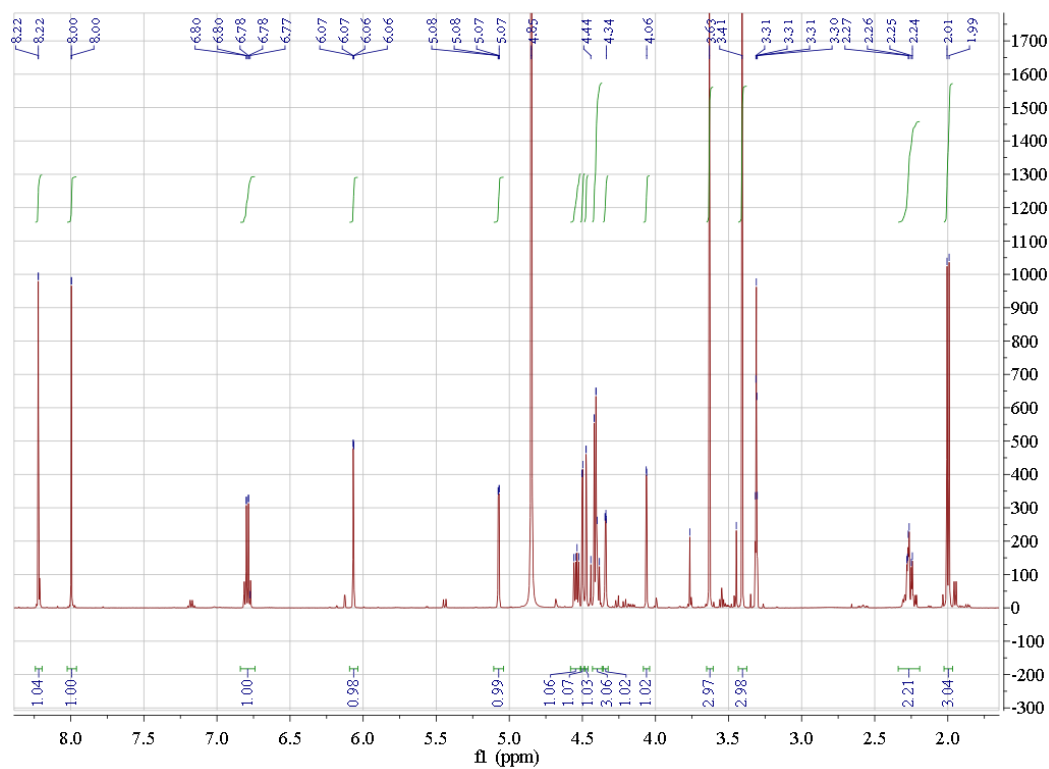

Figure S2  $^1\text{H}$  NMR spectrum of 1 in  $\text{CD}_3\text{OD}$

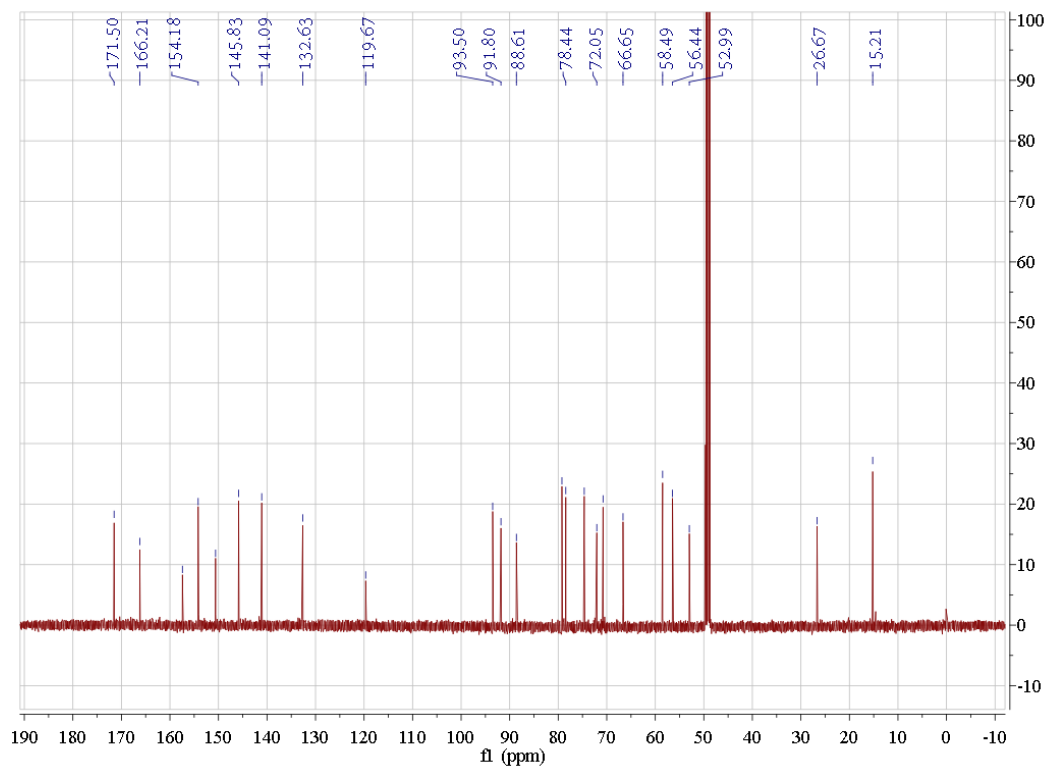

Figure S3  $^{13}\text{C}$  NMR spectrum of 1 in  $\text{CD}_3\text{OD}$

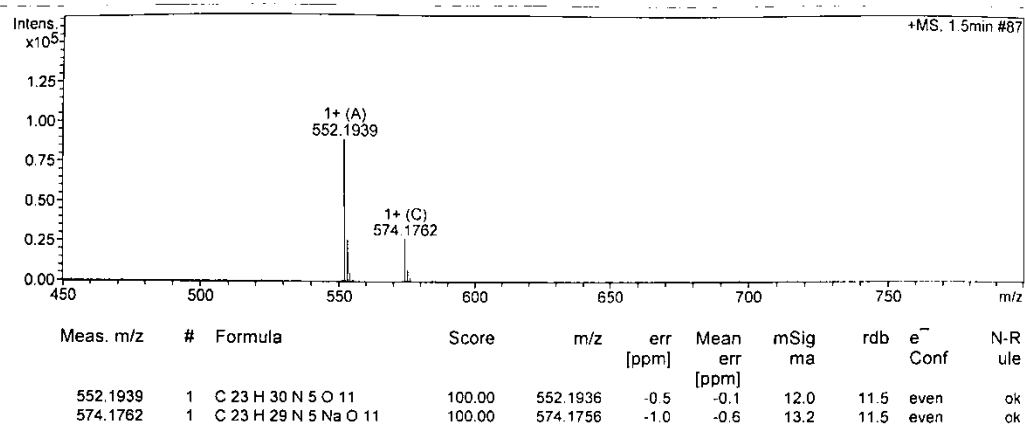

Figure S4 HRMS data of 1

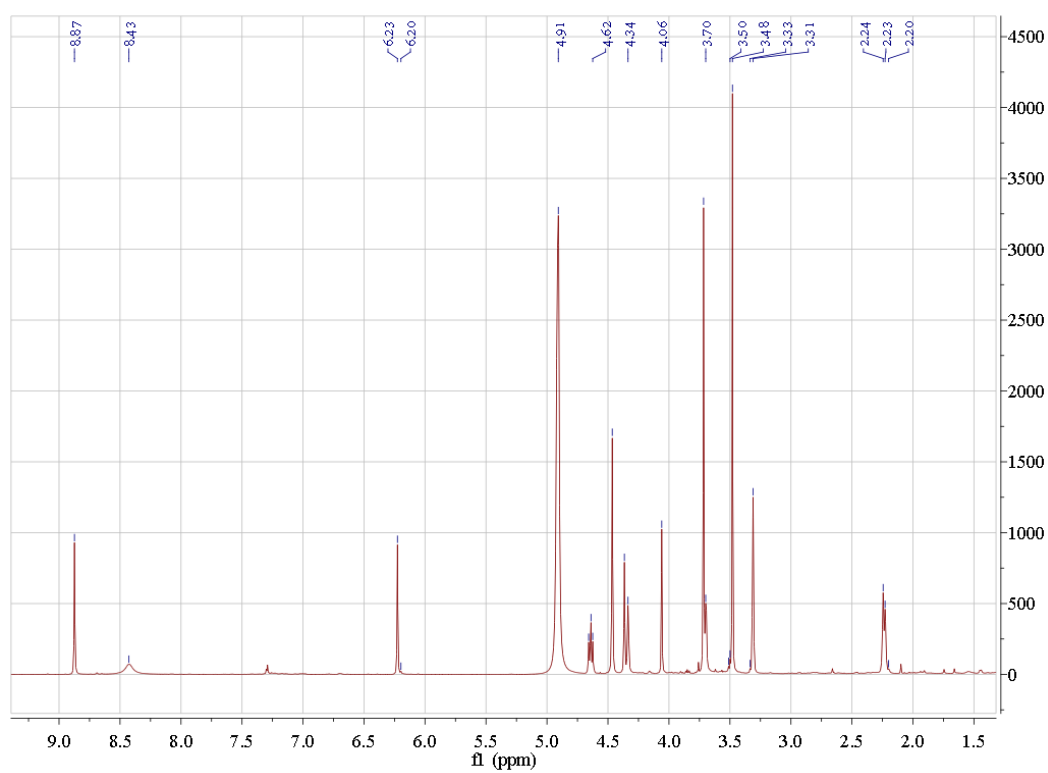

Figure S5 <sup>1</sup>H NMR spectrum of 2 in CD<sub>3</sub>OD

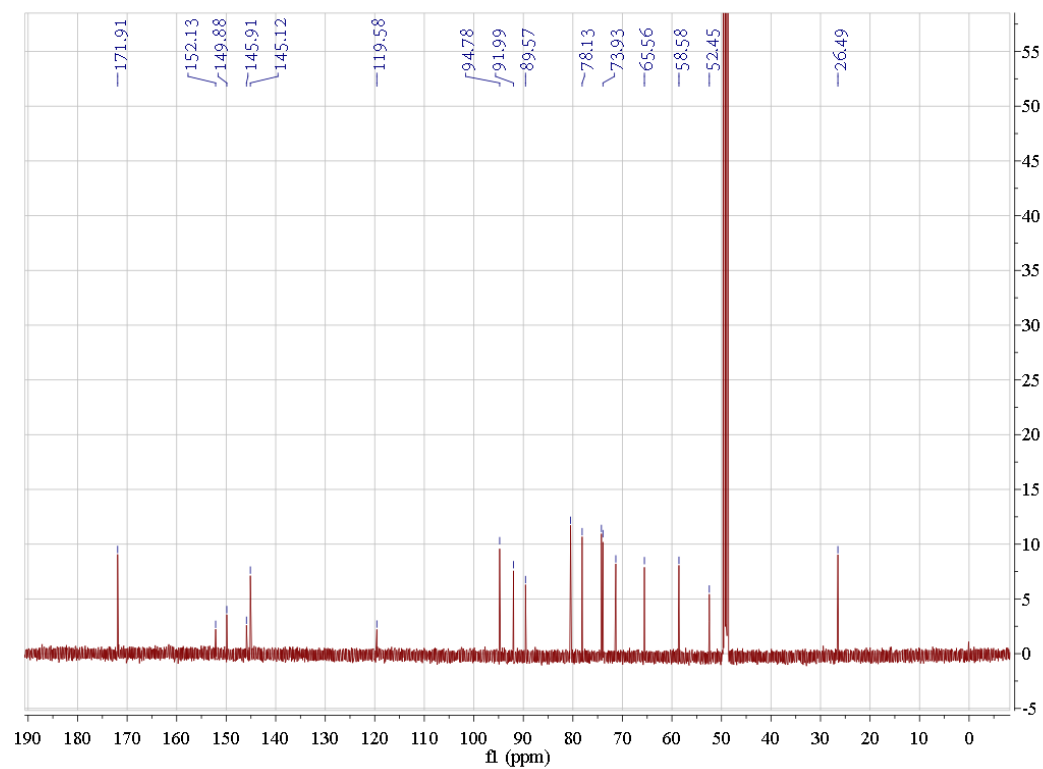

Figure S6  $^{13}\text{C}$  NMR spectrum of **2** in  $\text{CD}_3\text{OD}$

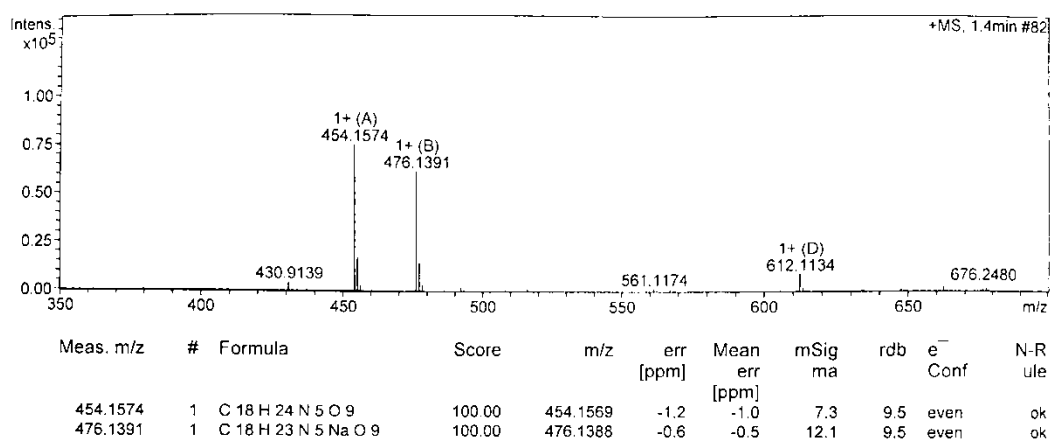

Figure S7 HRMS data of **2**

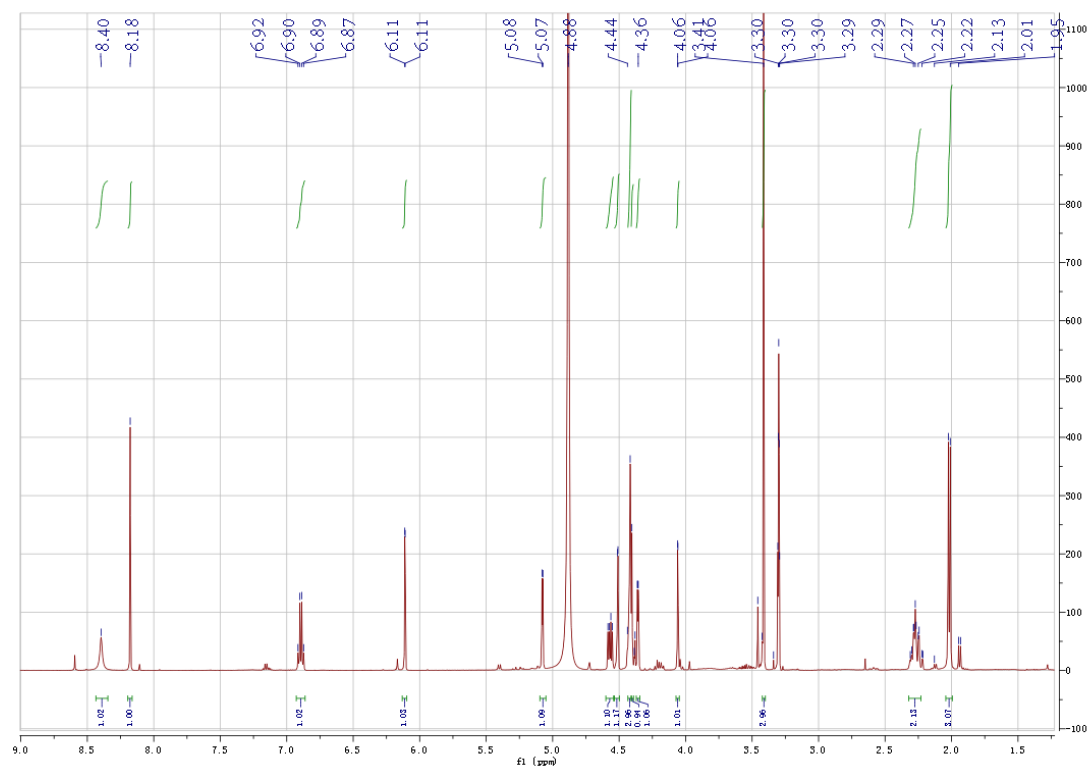

Figure S8  $^1\text{H}$  NMR spectrum of **7** in  $\text{CD}_3\text{OD}$

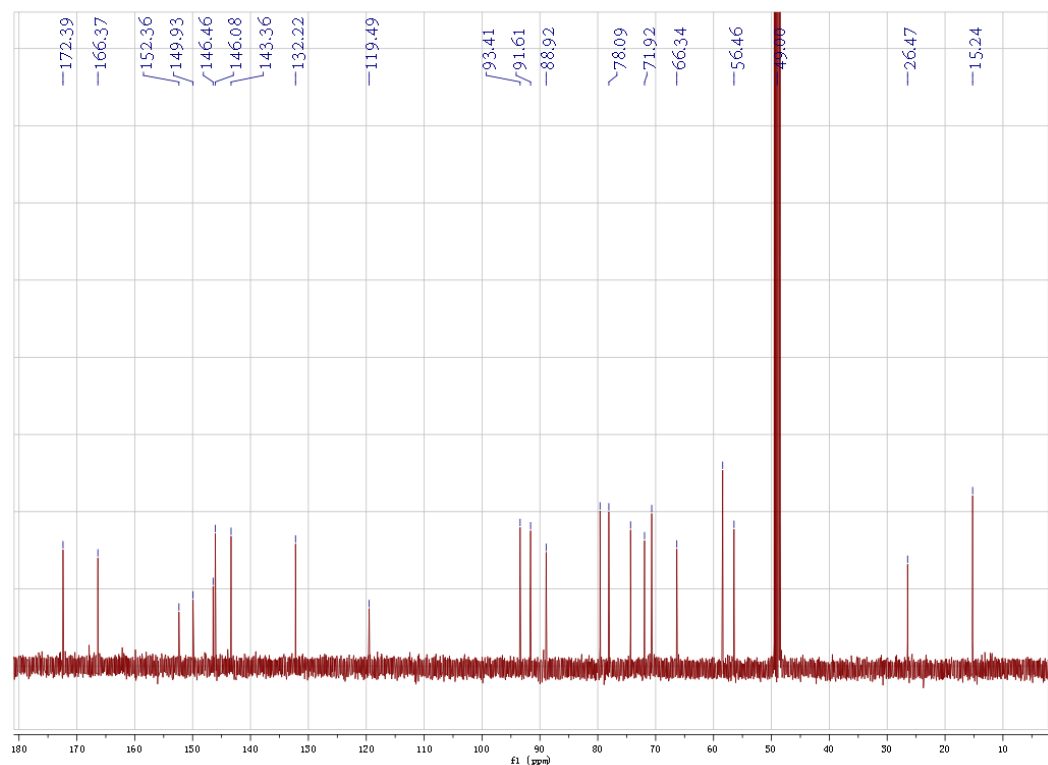

Figure S9  $^{13}\text{C}$  NMR spectrum of **7** in  $\text{CD}_3\text{OD}$

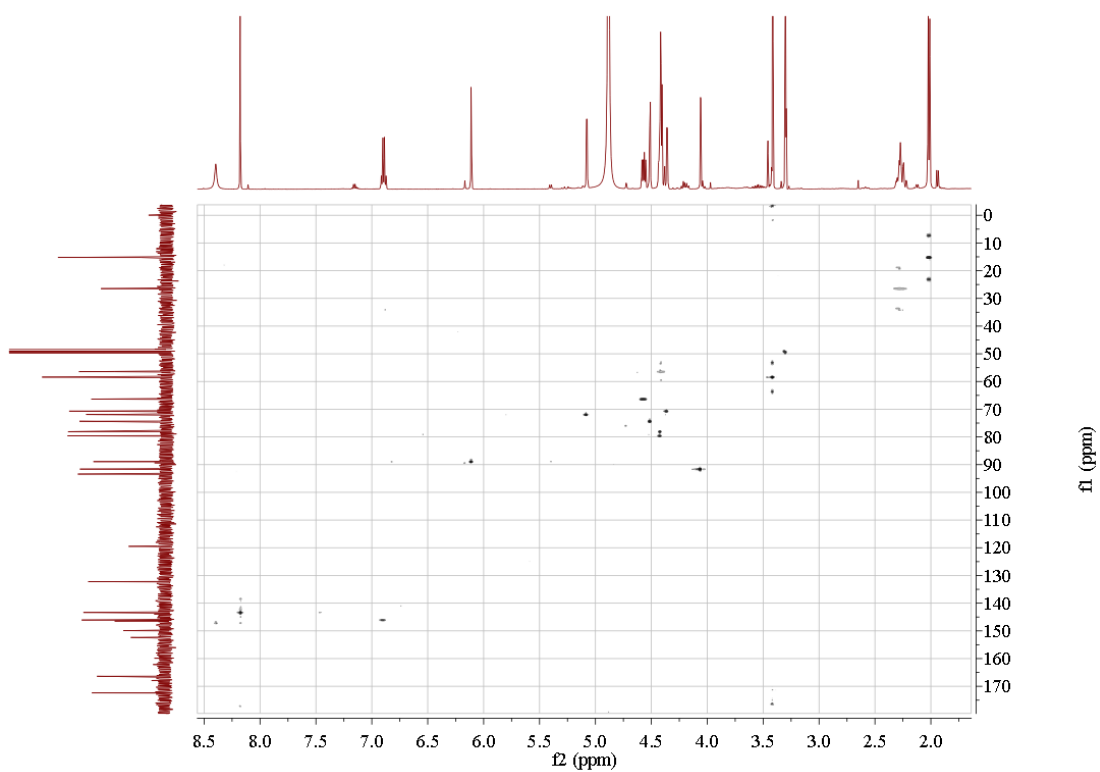

Figure S10 HSQC spectrum of 7 in CD<sub>3</sub>OD

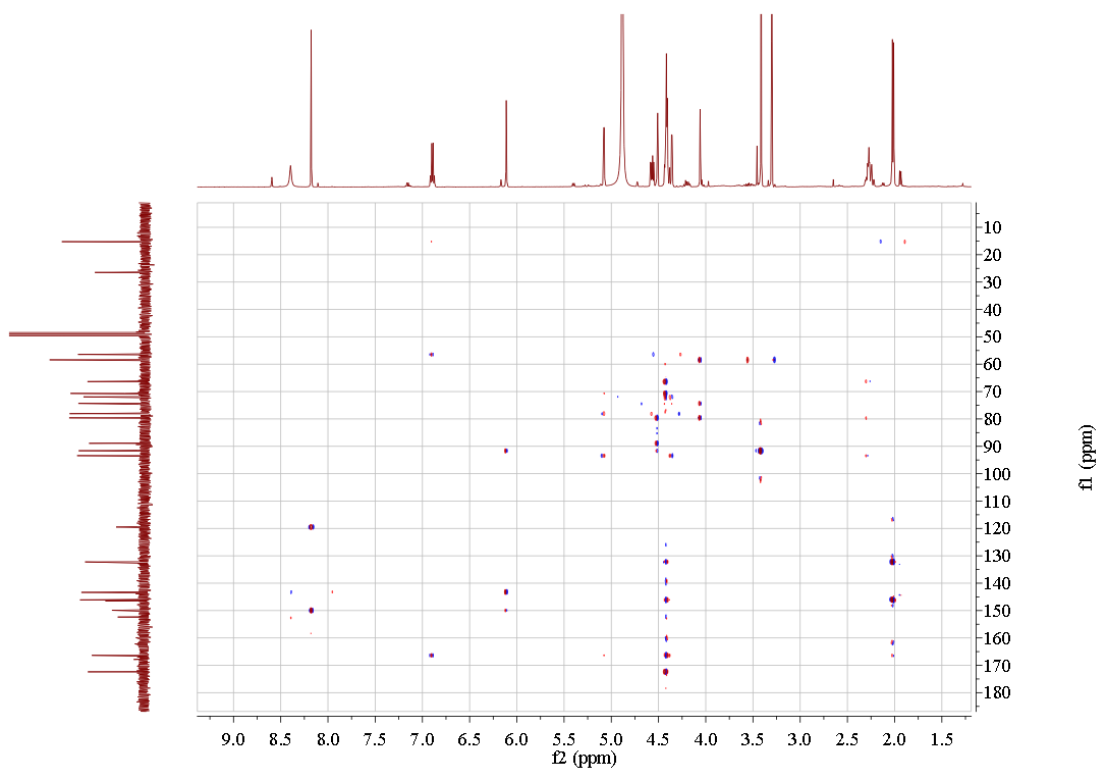

Figure S11 HMBC spectrum of 7 in CD<sub>3</sub>OD

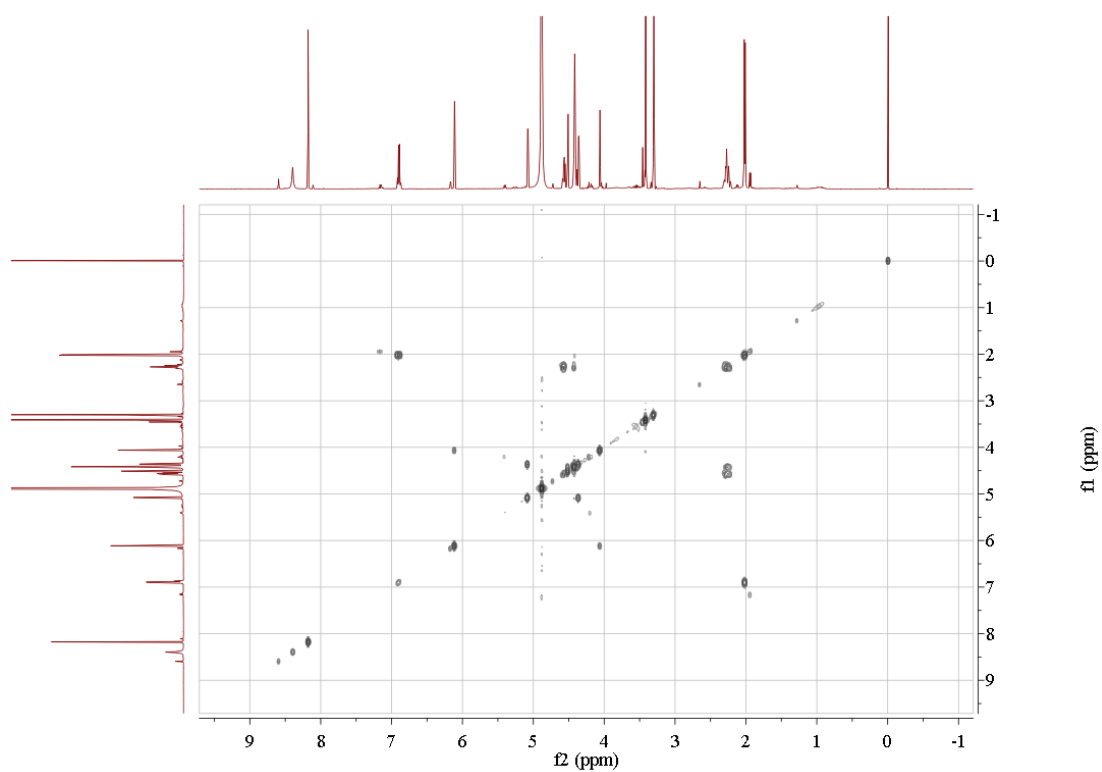

Figure S12  $^1\text{H}$ - $^1\text{H}$  COSY spectrum of 7 in  $\text{CD}_3\text{OD}$

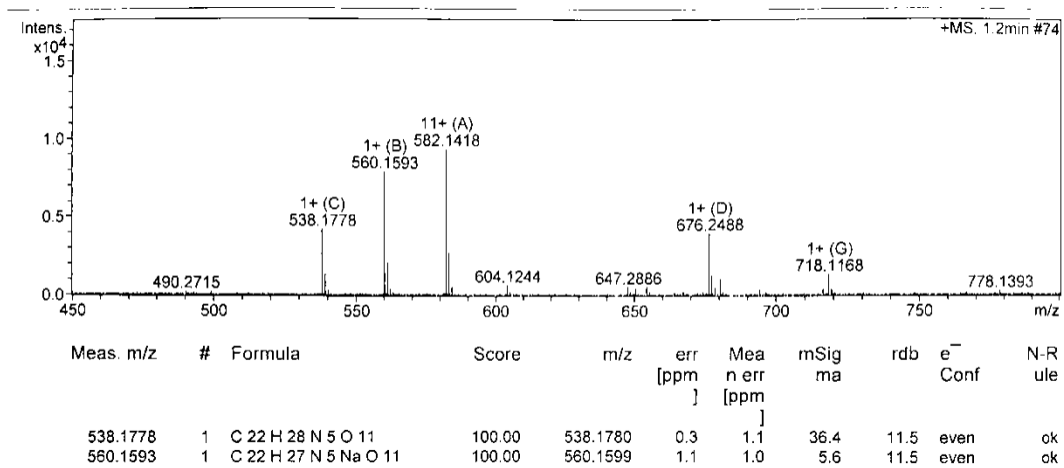

Figure S13 HRMS data of 7



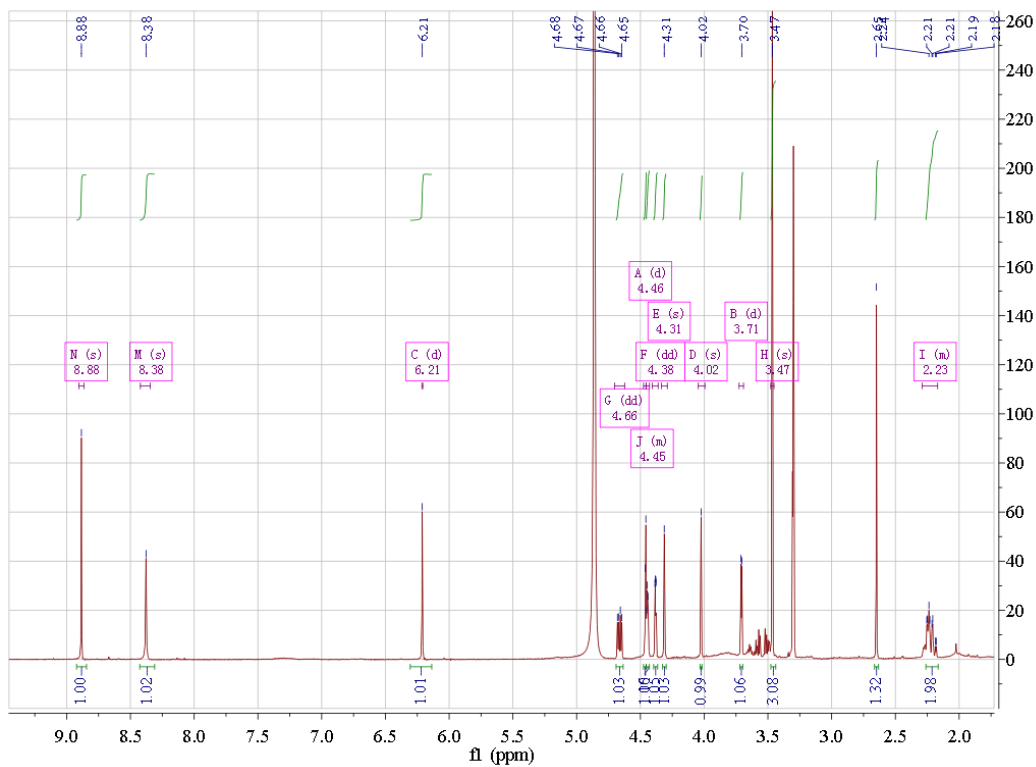

Figure S14  $^1\text{H}$  NMR spectrum of 10 in  $\text{CD}_3\text{OD}$

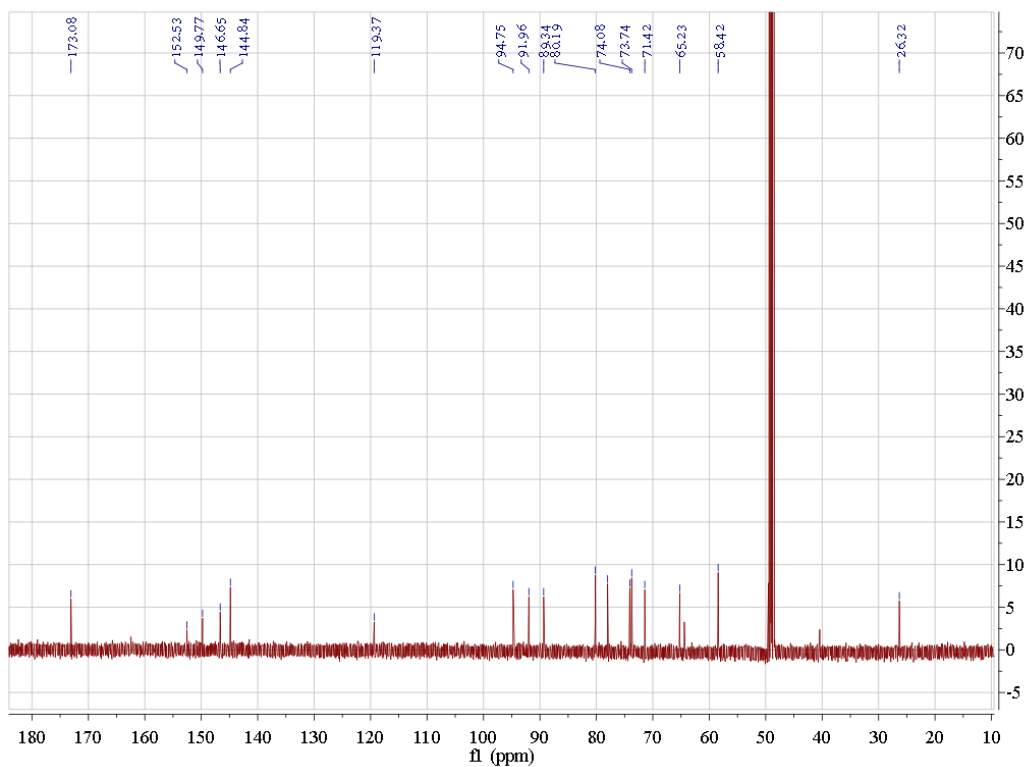

Figure S15  $^{13}\text{C}$  NMR spectrum of 10 in  $\text{CD}_3\text{OD}$

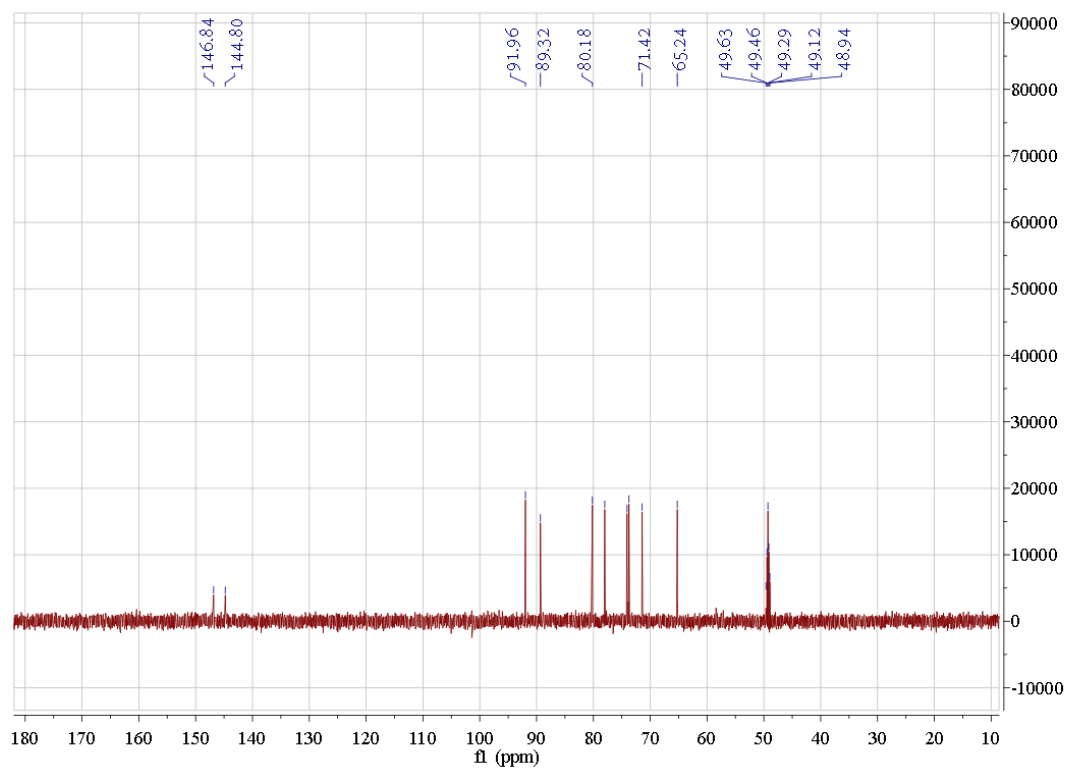

Figure S16 DEPT90 spectrum of 10 in CD<sub>3</sub>OD

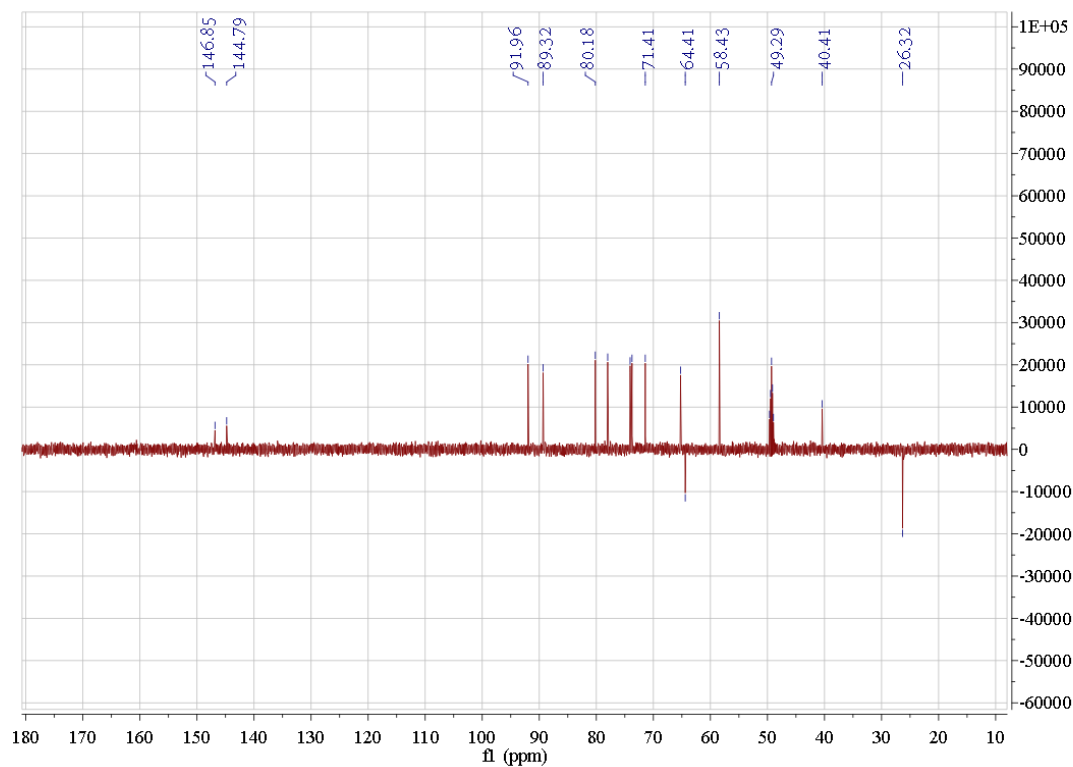

Figure S17 DEPT135 spectrum of 10 in CD<sub>3</sub>OD

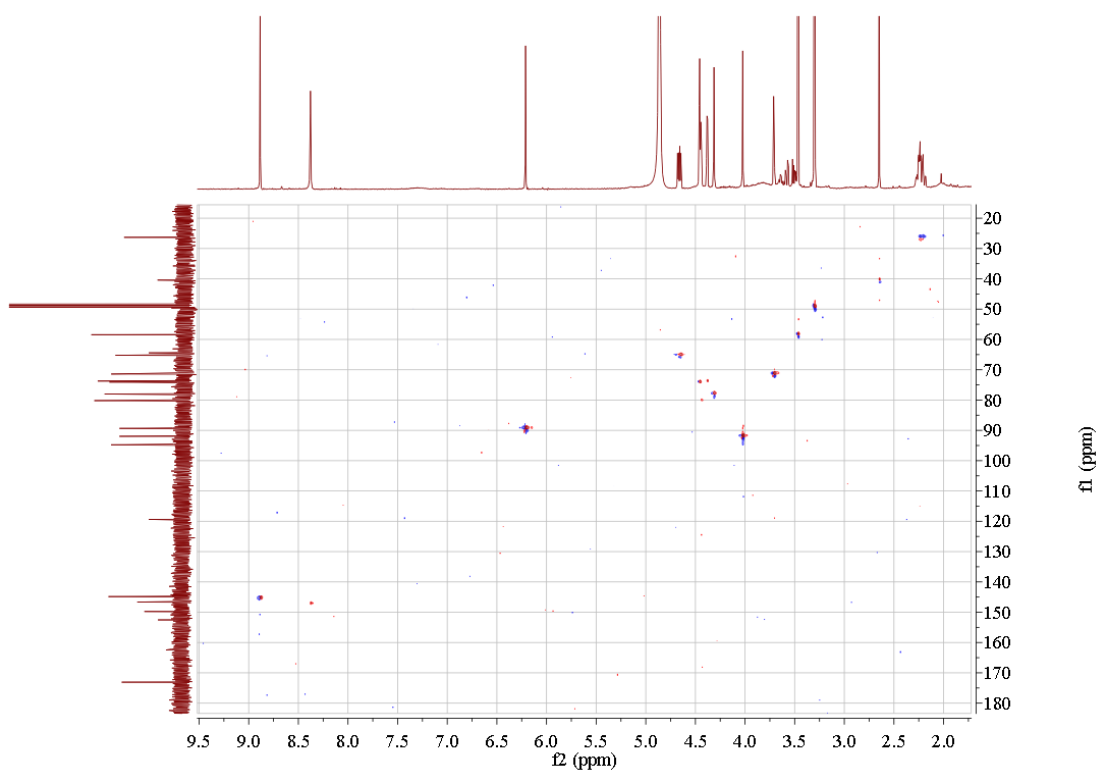

Figure S18 HSQC spectrum of 10 in CD<sub>3</sub>OD

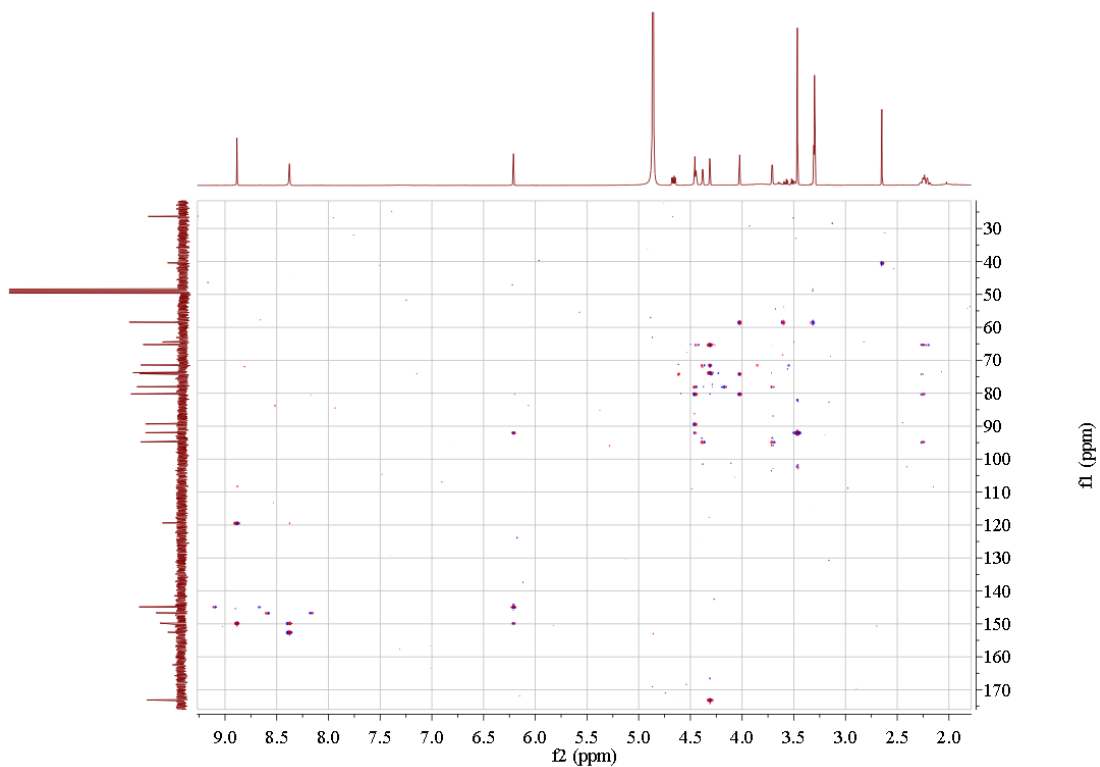

Figure S19 HMBC spectrum of 10 in CD<sub>3</sub>OD



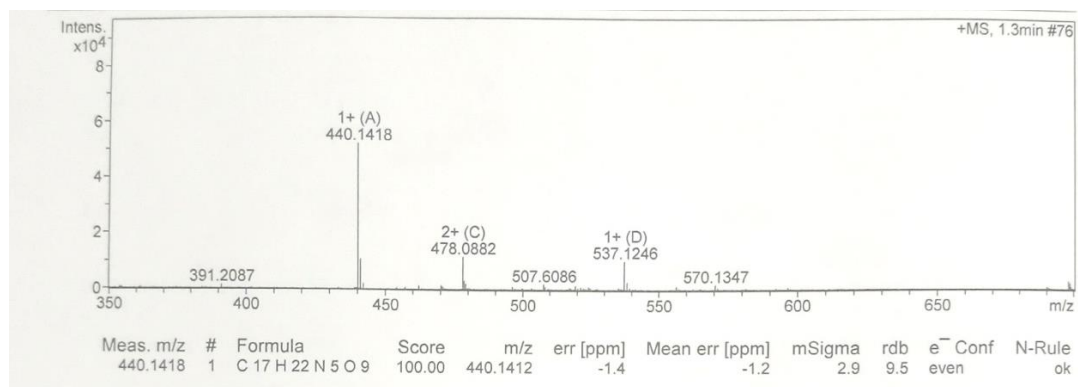

**Figure S22 HRMS data of 10**

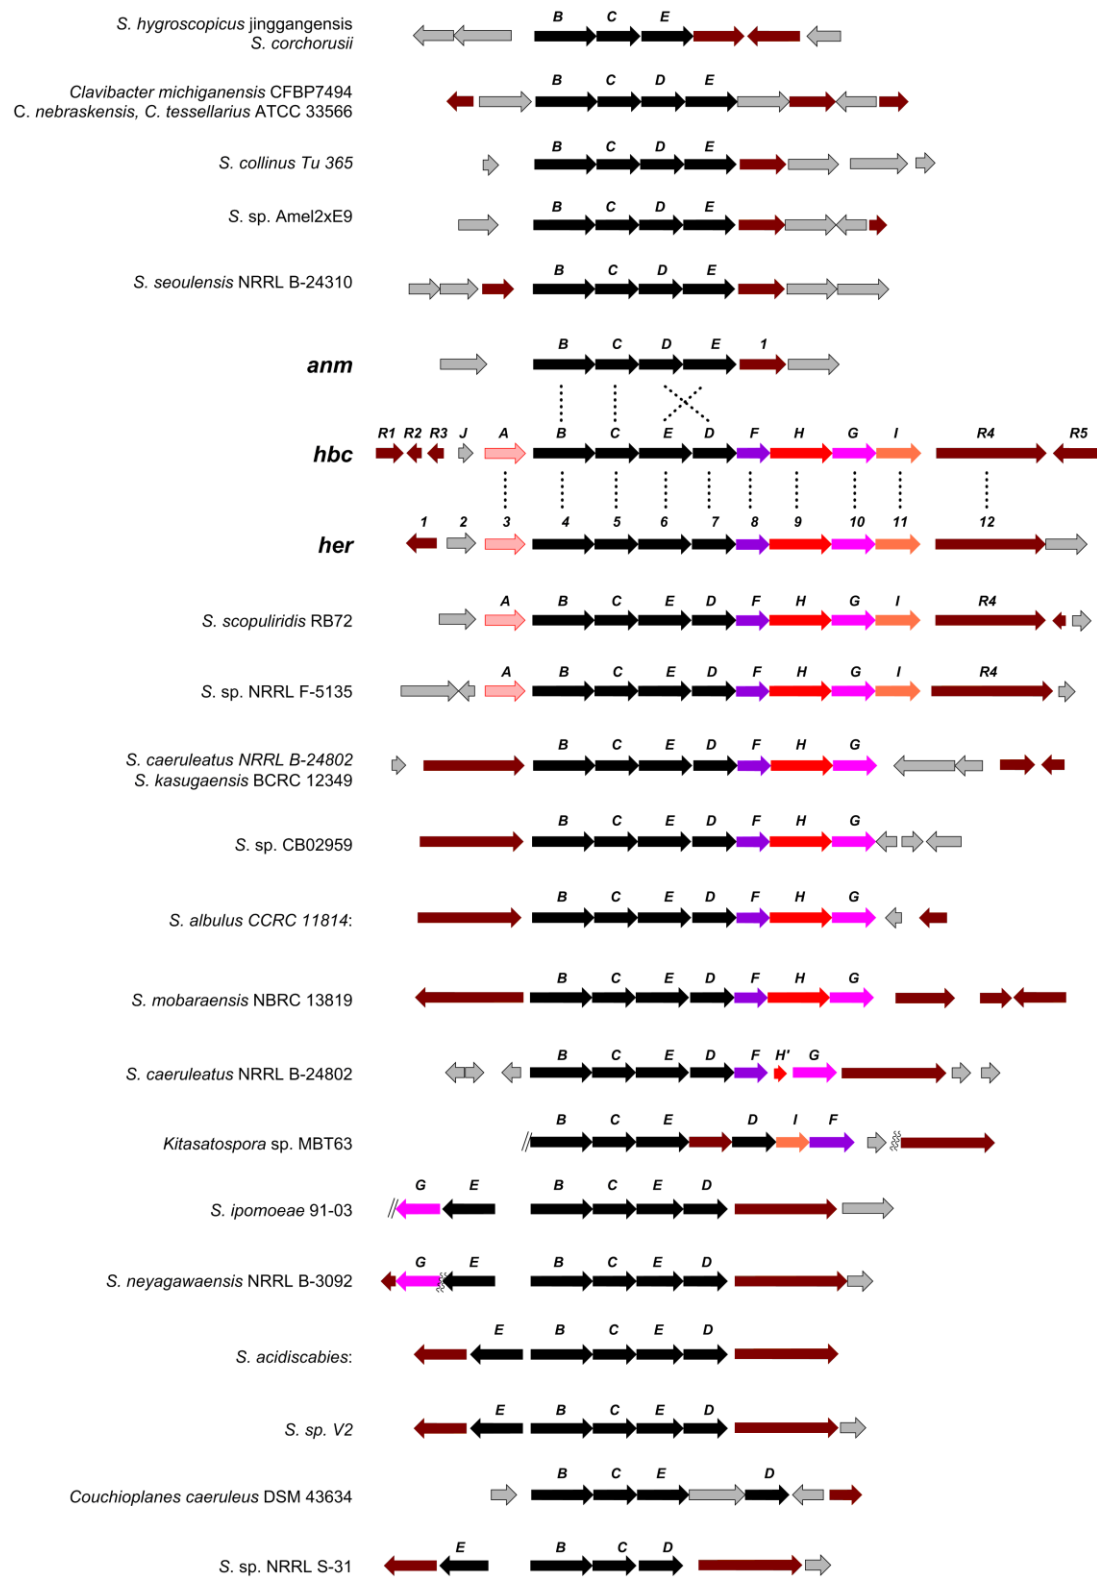

**Figure S23 Genetic organization of biosynthetic gene clusters for herbicidins (*hbc*, *her*), aureonuclemycin (*anm*), and some homologous BGCs found in NCBI Genbank**

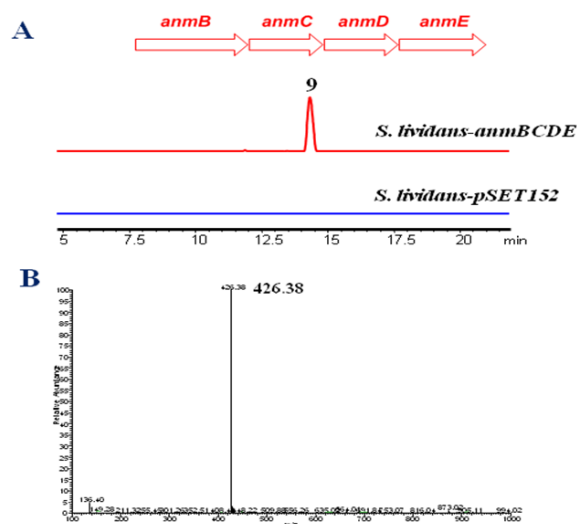

**Figure S24** Heterologous expression of the *anm* cluster in *S. lividans*.

A) HPLC analysis of the *anm* expression strain *S. lividans-anmBCDE* and the control strain *S. lividans-pSET152*, B) Mass spectrum for compound 9.

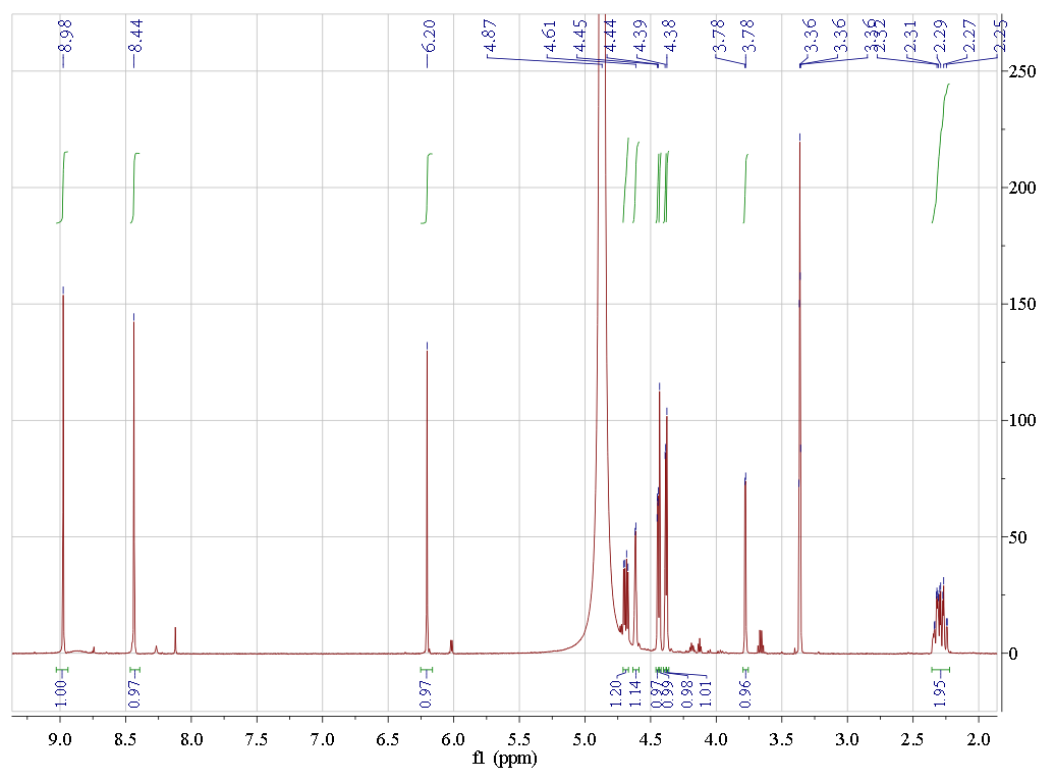

**Figure S25**  $^1\text{H}$  NMR spectrum of 9 in  $\text{CD}_3\text{OD}$

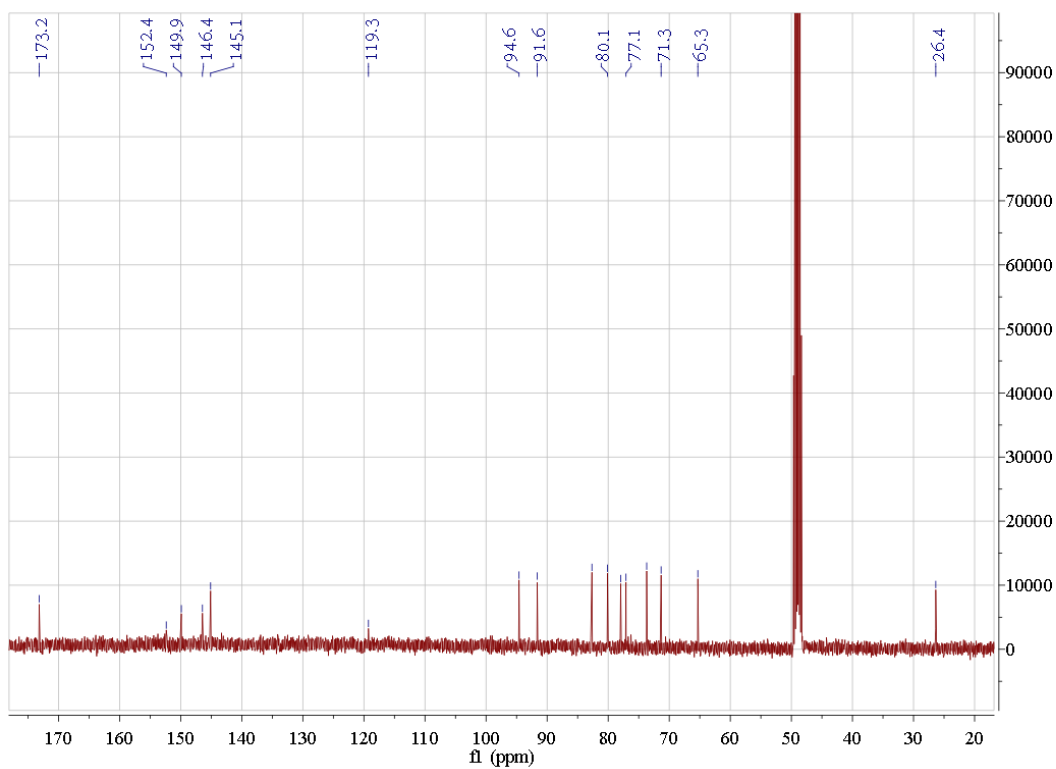

Figure S26  $^{13}\text{C}$  NMR spectrum of 9 in  $\text{CD}_3\text{OD}$

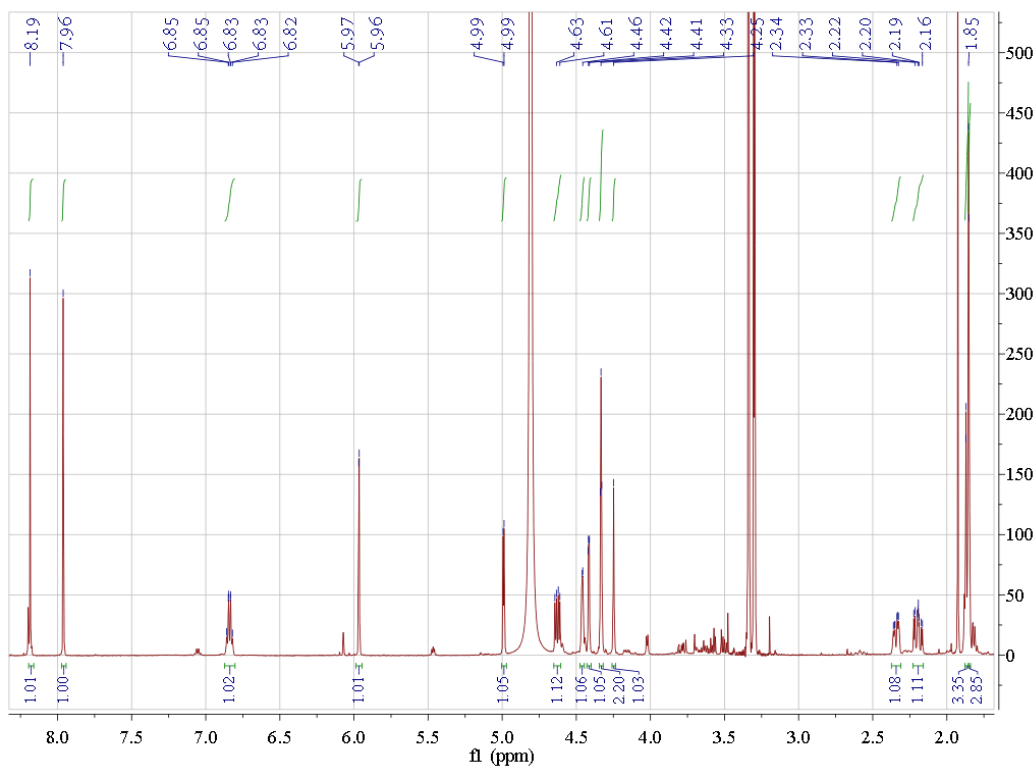

Figure S27  $^1\text{H}$  NMR spectrum of 6 in  $\text{CD}_3\text{OD}$



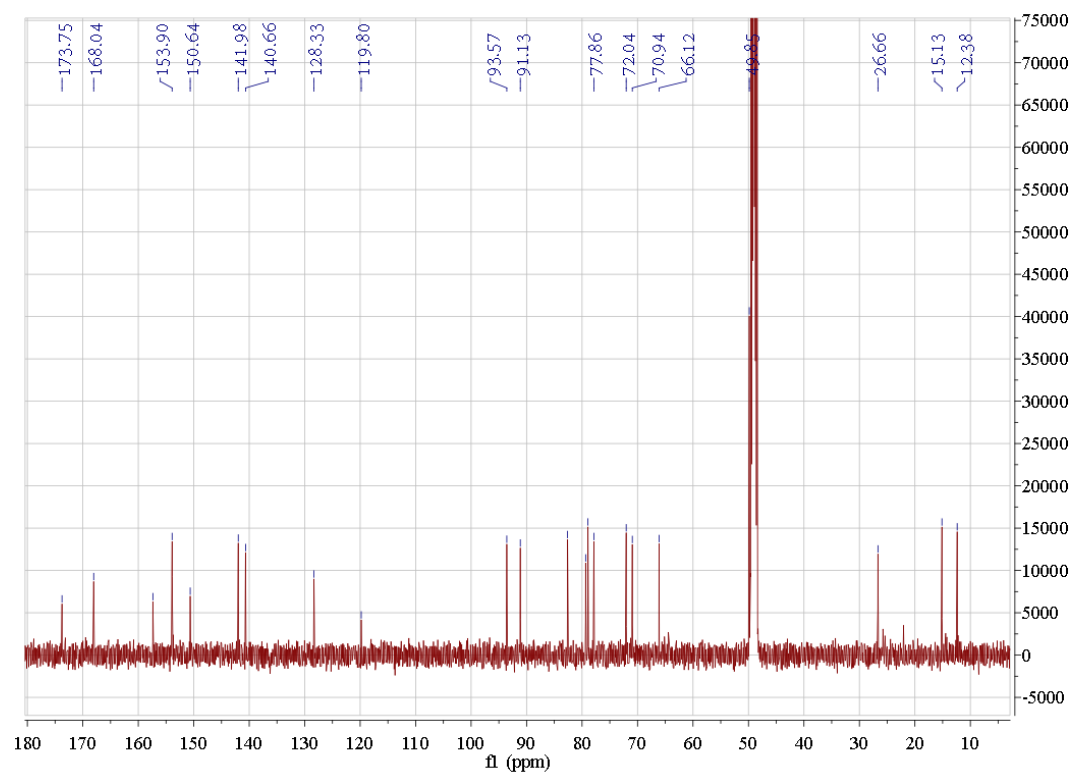

Figure S28  $^{13}\text{C}$  NMR spectrum of 6 in  $\text{CD}_3\text{OD}$

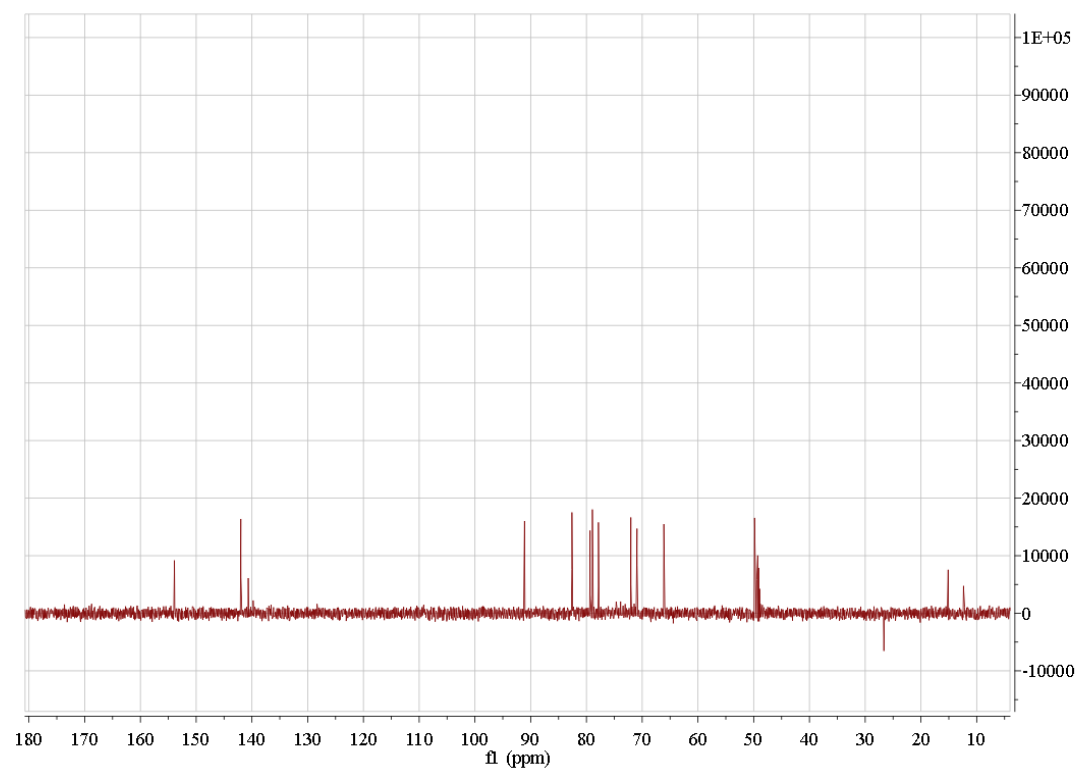

Figure S29 DEPT135 spectrum of 6 in  $\text{CD}_3\text{OD}$

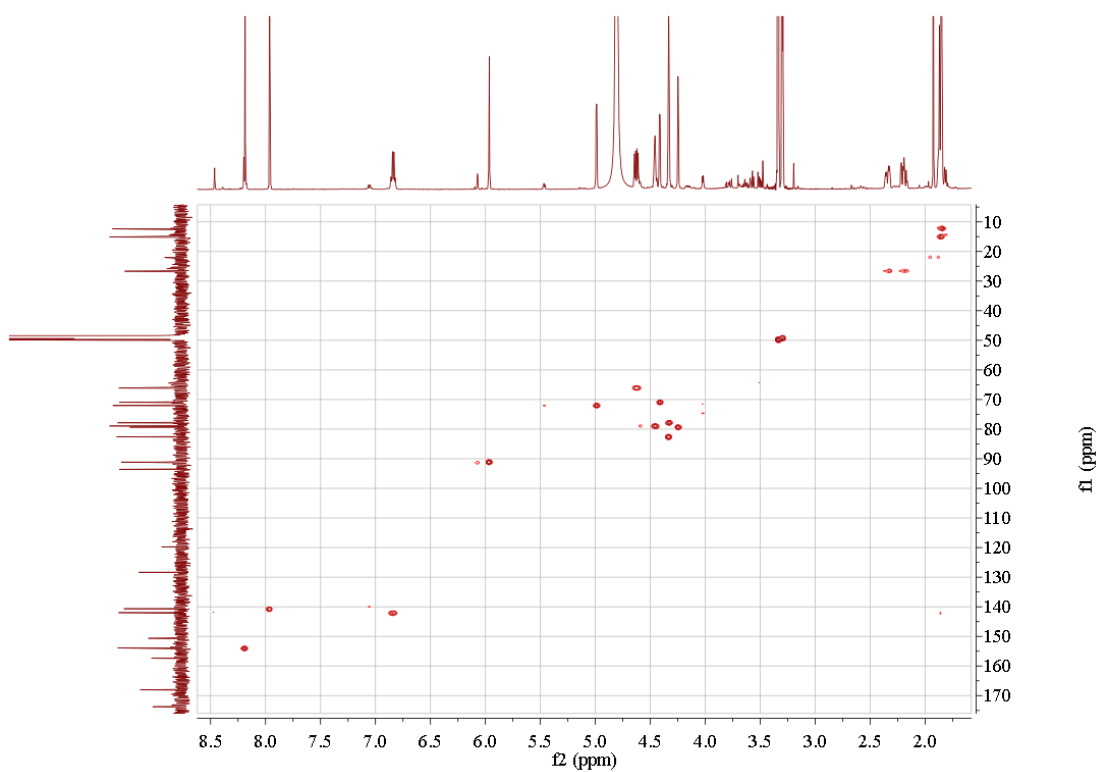

Figure S30 HSQC spectrum of 6 in CD<sub>3</sub>OD

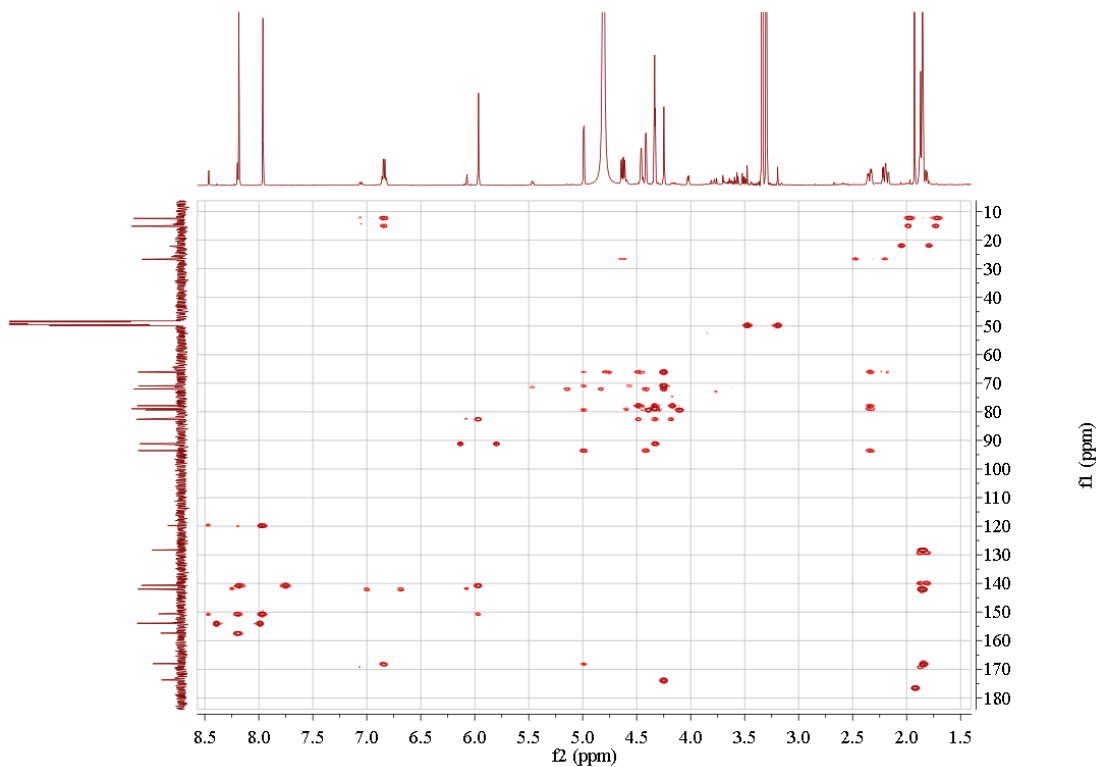

Figure S31 HMBC spectrum of 6 in CD<sub>3</sub>OD

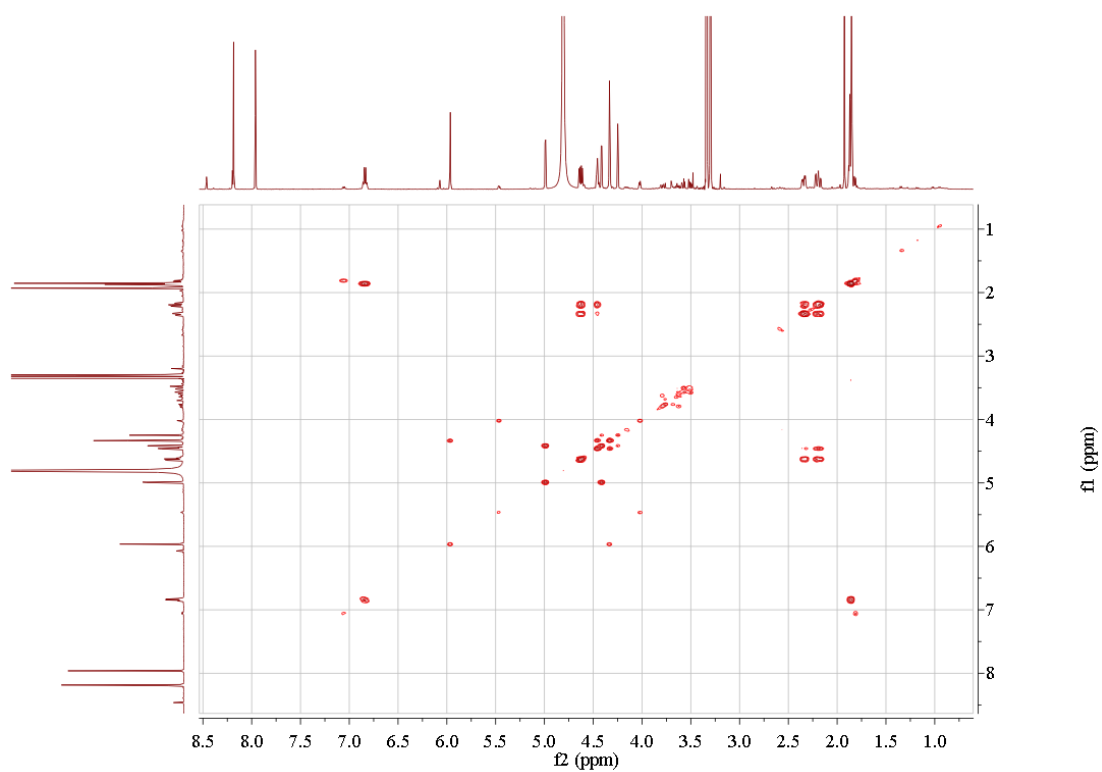

Figure S32  $^1\text{H}$ - $^1\text{H}$  COSY spectrum of **6** in  $\text{CD}_3\text{OD}$

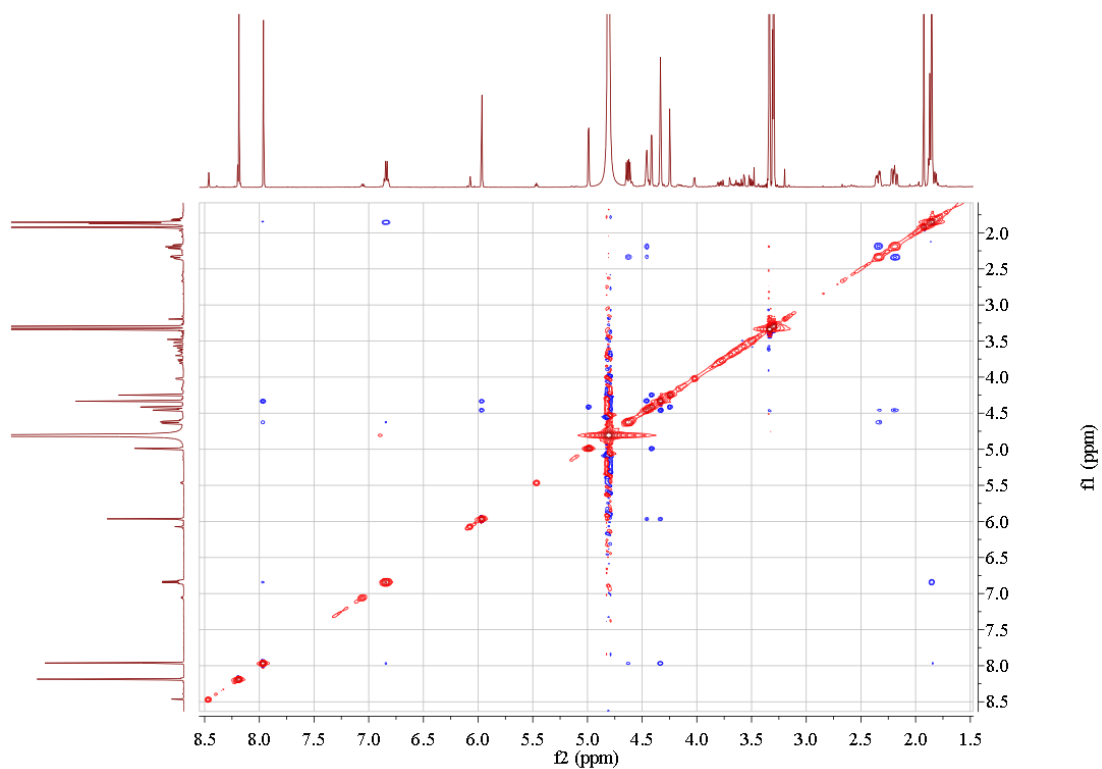

Figure S33 NOESY spectrum of **6** in  $\text{CD}_3\text{OD}$

# Mass Spectrum SmartFormula Report

**Analysis Info**  
 Analysis Name: D:\Data\SHUJVFENXI\tanggongli-group\2005015Her\_RB4\_01\_7280.d  
 Method: 20150915.m  
 Sample Name: 2005015Her  
 Comment:  
 Acquisition Date: 12/21/2016 4:13:31 AM  
 Operator: BDAL@DE  
 Instrument / Ser#: maXis 4G 21240

**Acquisition Parameter**  
 Source Type: ESI      Ion Polarity: Positive      Set Nebulizer: 1.0 Bar  
 Focus: Not active      Set Capillary: 4000 V      Set Dry Heater: 220 °C  
 Scan Begin: 50 m/z      Set End Plate Offset: -500 V      Set Dry Gas: 6.0 l/min  
 Scan End: 1500 m/z      Set Collision Cell RF: 600.0 Vpp      Set Divert Valve: Waste

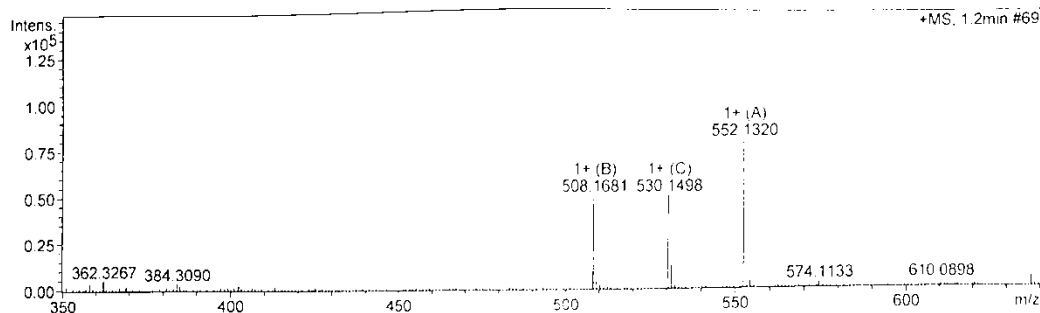

| Meas. m/z | #  | Formula                                                          | Score  | m/z      | err [ppm] | Mean err [ppm] | mSig ma | rdb  | e <sup>-</sup> Conf | N R rule |
|-----------|----|------------------------------------------------------------------|--------|----------|-----------|----------------|---------|------|---------------------|----------|
| 508.1681  | 1  | C <sub>21</sub> H <sub>26</sub> N <sub>5</sub> O <sub>10</sub>   | 100.00 | 508.1674 | -1.3      | -1.1           | 3.9     | 11.5 | even                | ok       |
|           | 2  | C <sub>20</sub> H <sub>23</sub> N <sub>9</sub> NaO <sub>6</sub>  | 49.90  | 508.1664 | -3.4      | -3.2           | 6.5     | 13.5 | even                | ok       |
|           | 3  | C <sub>24</sub> H <sub>27</sub> N <sub>3</sub> NaO <sub>8</sub>  | 81.12  | 508.1690 | 1.9       | 2.1            | 7.1     | 12.5 | even                | ok       |
|           | 4  | C <sub>22</sub> H <sub>22</sub> N <sub>9</sub> O <sub>6</sub>    | 91.99  | 508.1688 | 1.3       | 1.6            | 8.5     | 16.5 | even                | ok       |
|           | 5  | C <sub>21</sub> H <sub>19</sub> N <sub>13</sub> NaO <sub>2</sub> | 98.02  | 508.1677 | -0.8      | -0.6           | 12.3    | 18.5 | even                | ok       |
|           | 6  | C <sub>19</sub> H <sub>14</sub> N <sub>19</sub>                  | 82.25  | 508.1674 | -1.3      | -1.2           | 14.3    | 22.5 | even                | ok       |
|           | 7  | C <sub>36</sub> H <sub>23</sub> N <sub>3</sub> NaO               | 15.67  | 508.1672 | -1.8      | -1.5           | 69.2    | 25.5 | even                | ok       |
|           | 8  | C <sub>38</sub> H <sub>22</sub> NO                               | 6.94   | 508.1696 | 3.0       | 3.3            | 80.7    | 28.5 | even                | ok       |
| 530.1498  | 1  | C <sub>19</sub> H <sub>20</sub> N <sub>11</sub> O <sub>8</sub>   | 88.75  | 530.1491 | -1.3      | -1.2           | 2.4     | 15.5 | even                | ok       |
|           | 2  | C <sub>21</sub> H <sub>25</sub> N <sub>5</sub> NaO <sub>10</sub> | 100.00 | 530.1494 | -0.8      | -0.6           | 3.5     | 11.5 | even                | ok       |
|           | 3  | C <sub>18</sub> H <sub>17</sub> N <sub>15</sub> NaO <sub>4</sub> | 44.84  | 530.1480 | -3.3      | -3.2           | 4.0     | 17.5 | even                | ok       |
|           | 4  | C <sub>22</sub> H <sub>28</sub> N <sub>3</sub> O <sub>14</sub>   | 83.41  | 530.1504 | 1.2       | 1.3            | 7.3     | 9.5  | even                | ok       |
|           | 5  | C <sub>23</sub> H <sub>24</sub> N <sub>5</sub> O <sub>10</sub>   | 32.78  | 530.1518 | 3.8       | 4.0            | 12.1    | 14.5 | even                | ok       |
|           | 6  | C <sub>22</sub> H <sub>21</sub> N <sub>9</sub> NaO <sub>6</sub>  | 65.79  | 530.1507 | 1.7       | 1.9            | 12.3    | 16.5 | even                | ok       |
|           | 7  | C <sub>20</sub> H <sub>16</sub> N <sub>15</sub> O <sub>4</sub>   | 76.09  | 530.1504 | 1.2       | 1.3            | 12.5    | 20.5 | even                | ok       |
|           | 8  | C <sub>20</sub> H <sub>29</sub> N <sub>3</sub> NaO <sub>14</sub> | 38.18  | 530.1480 | -3.3      | -3.2           | 13.2    | 6.5  | even                | ok       |
|           | 9  | C <sub>19</sub> H <sub>13</sub> N <sub>19</sub> Na               | 79.32  | 530.1494 | -0.8      | -0.7           | 15.7    | 22.5 | even                | ok       |
|           | 10 | C <sub>21</sub> H <sub>12</sub> N <sub>19</sub>                  | 23.89  | 530.1518 | 3.7       | 3.8            | 27.3    | 25.5 | even                | ok       |
|           | 11 | C <sub>35</sub> H <sub>20</sub> N <sub>3</sub> O <sub>3</sub>    | 17.87  | 530.1499 | 0.3       | 0.5            | 72.1    | 27.5 | even                | ok       |
|           | 12 | C <sub>38</sub> H <sub>21</sub> N <sub>3</sub> NaO               | 4.34   | 530.1515 | 3.3       | 3.6            | 84.7    | 28.5 | even                | ok       |

**Figure S34 HRMS data of 6**

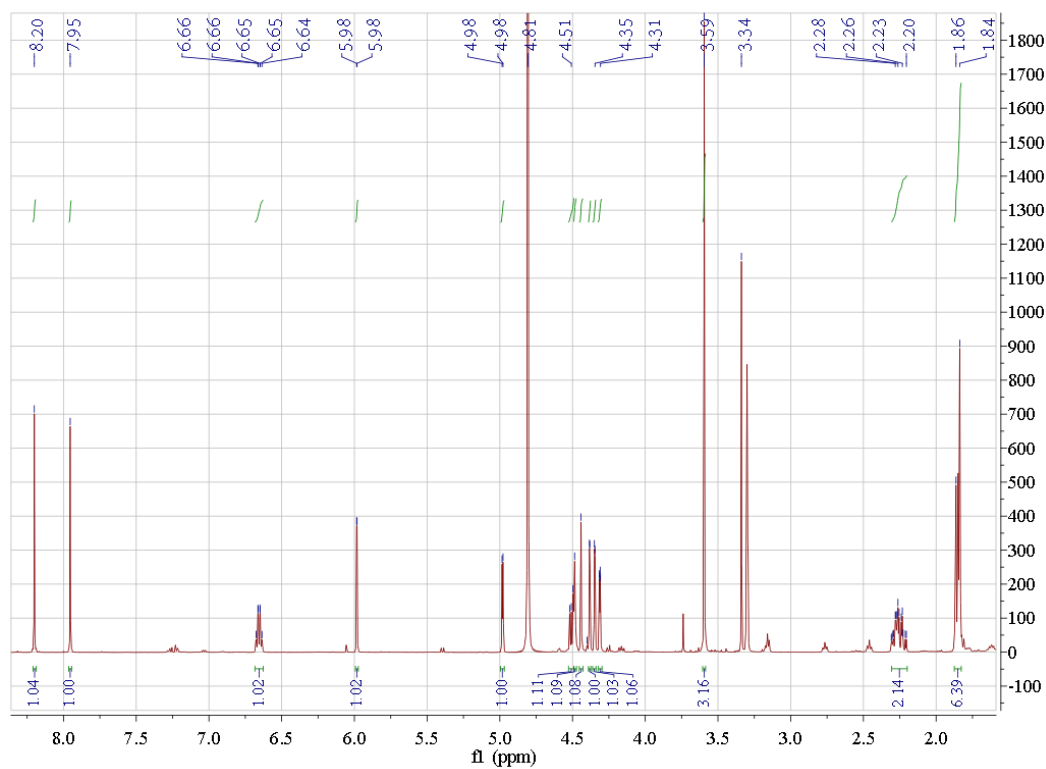

Figure S35  $^1\text{H}$  NMR spectrum of 8 in  $\text{CD}_3\text{OD}$

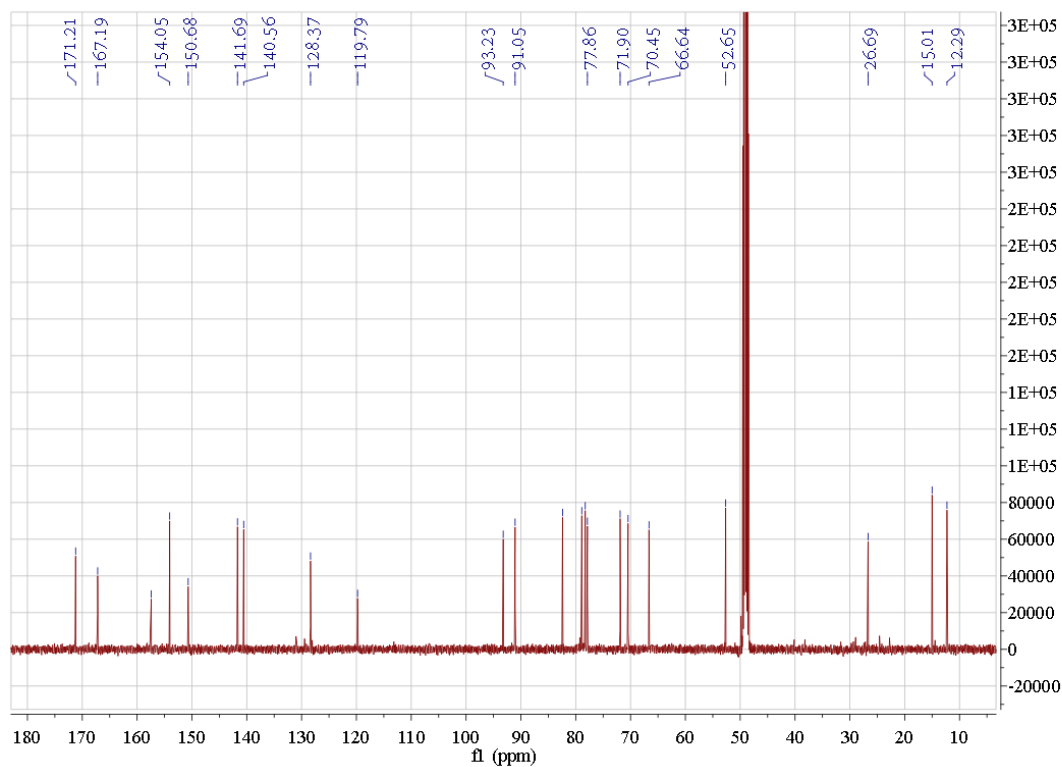

Figure S36  $^{13}\text{C}$  NMR spectrum of 8 in  $\text{CD}_3\text{OD}$

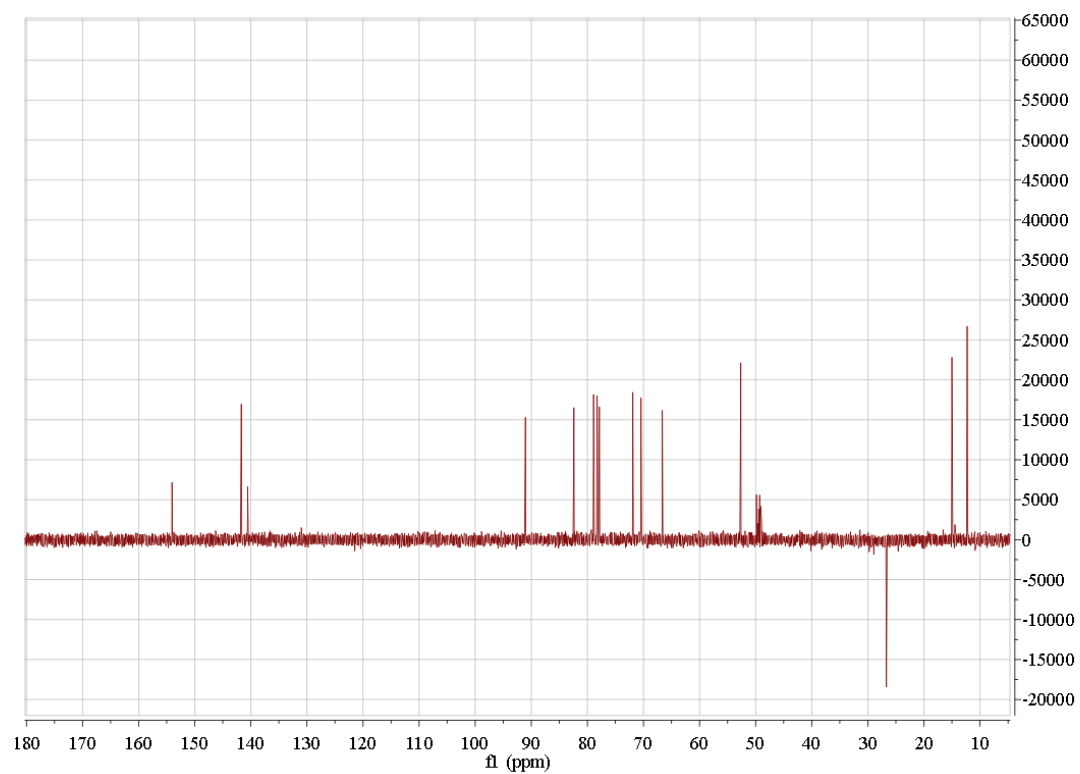

Figure S37 DEPT135 spectrum of 8 in CD<sub>3</sub>OD

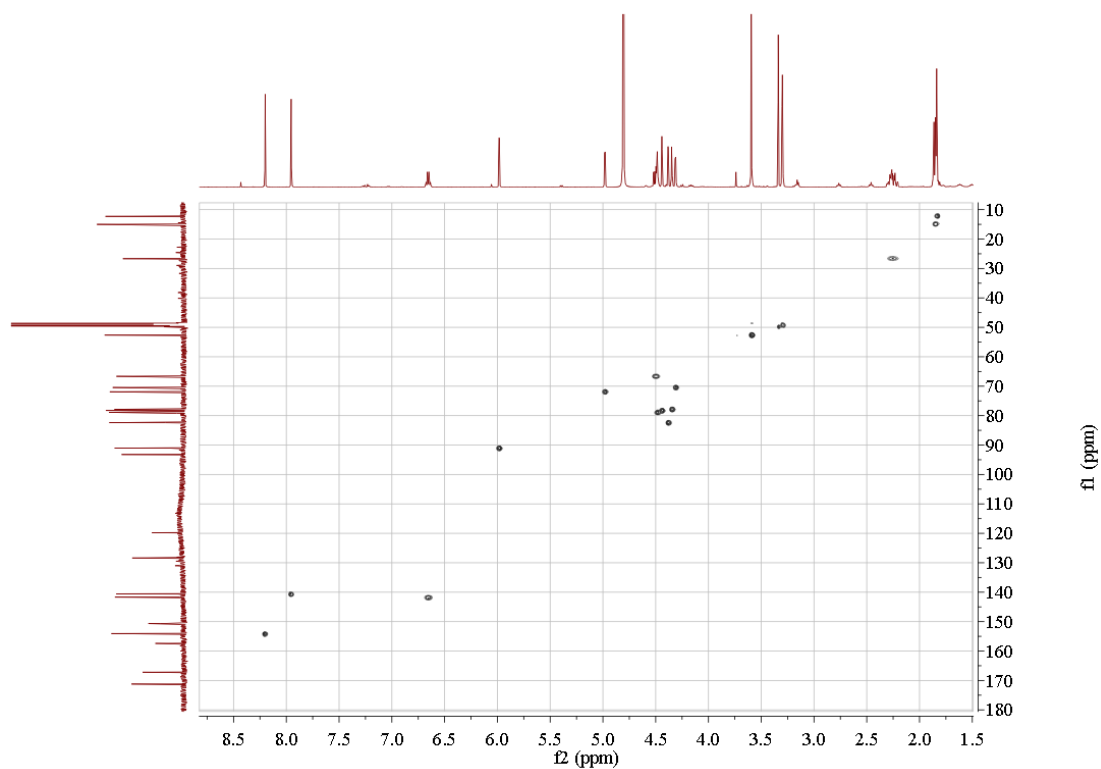

Figure S38 HSQC spectrum of 8 in CD<sub>3</sub>OD

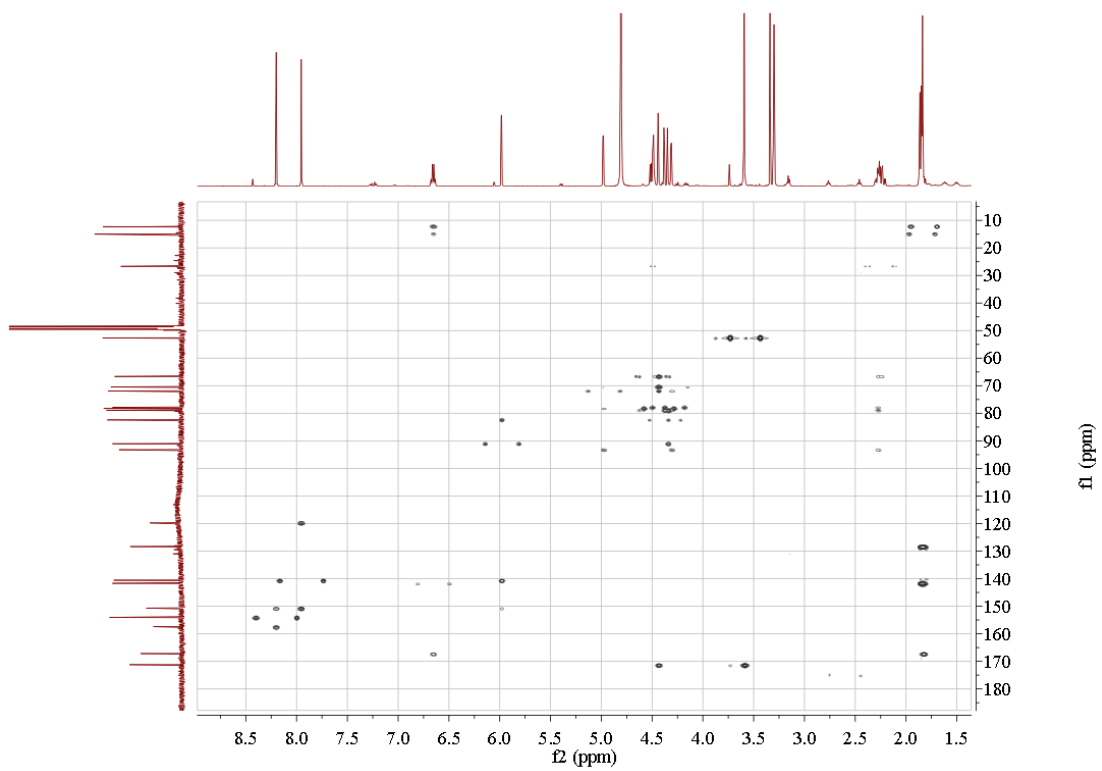

Figure S39 HMBC spectrum of 8 in CD<sub>3</sub>OD

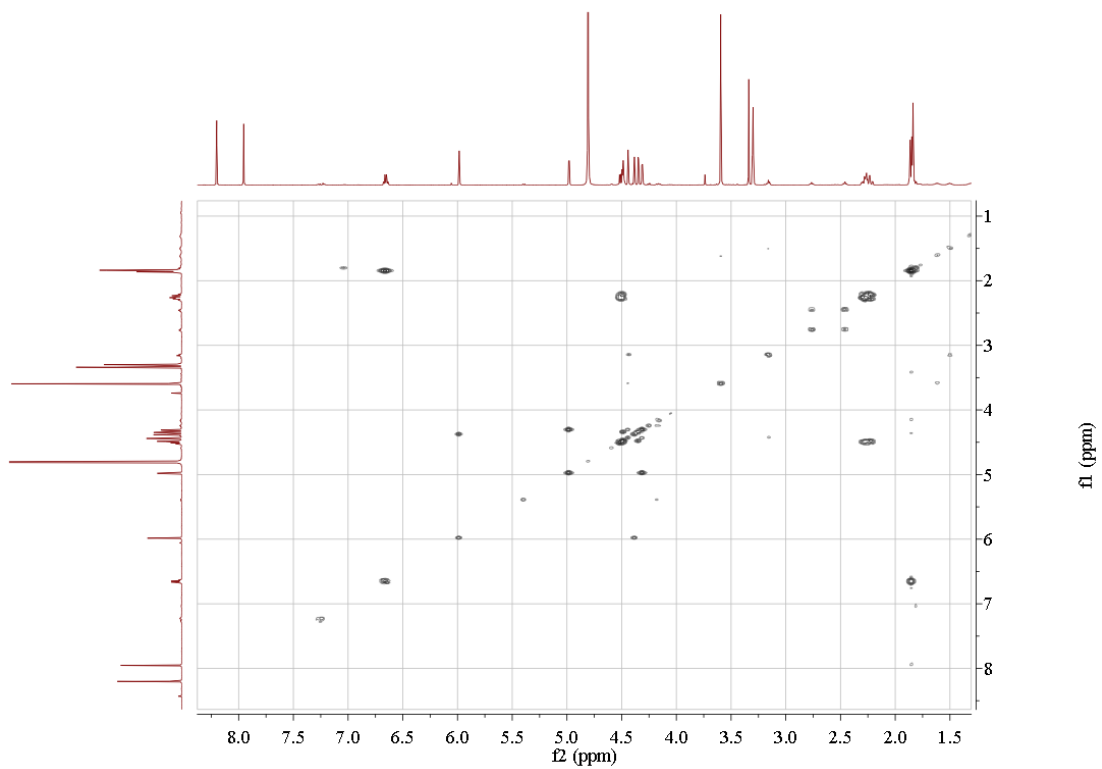

Figure S40 <sup>1</sup>H-<sup>1</sup>H COSY spectrum of 8 in CD<sub>3</sub>OD

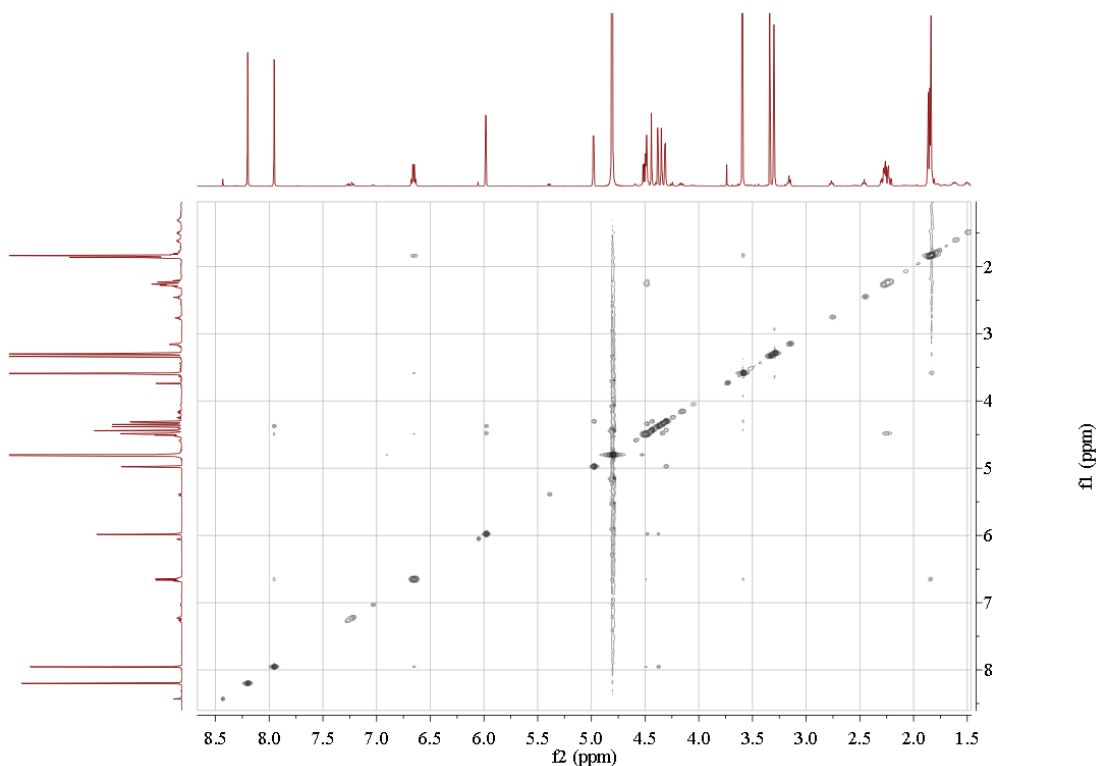

Figure S41 NOESY spectrum of 8 in CD<sub>3</sub>OD

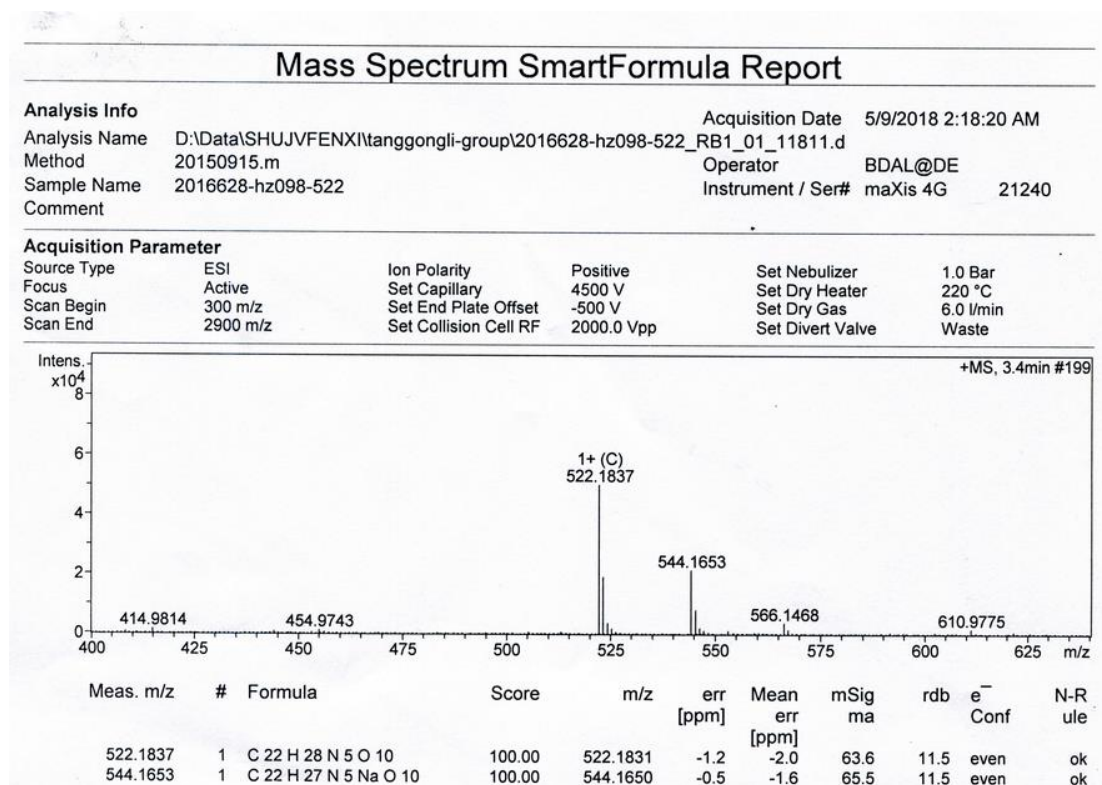

Figure S42 HRMS data of 8



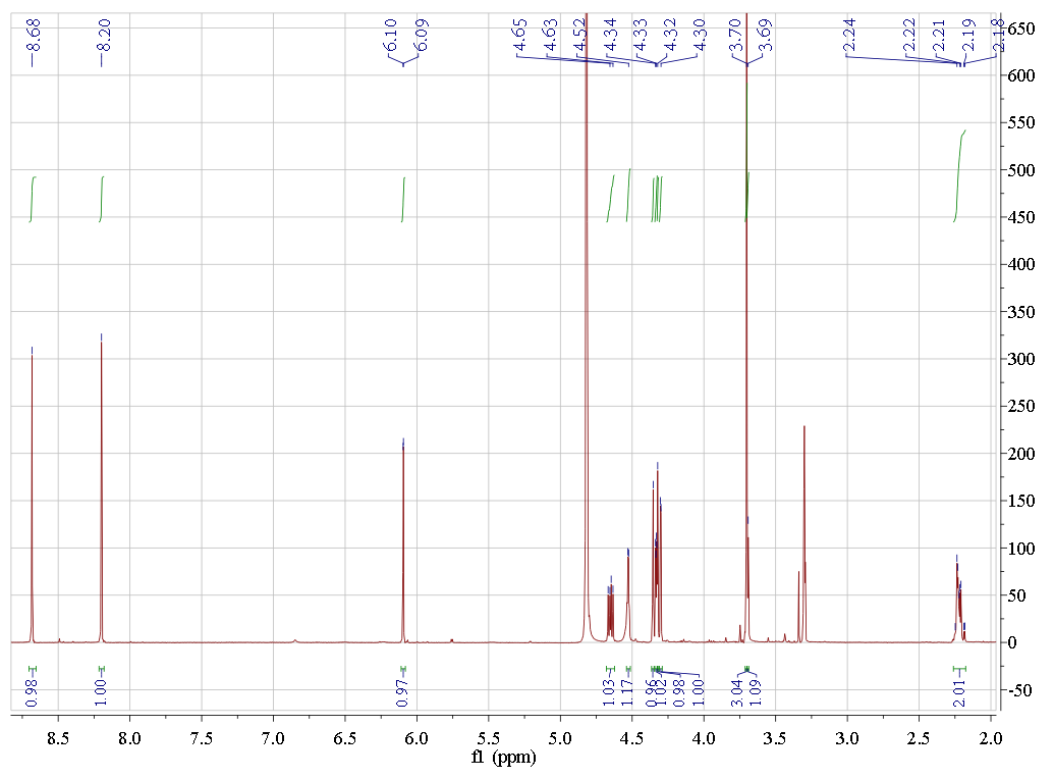

Figure S43  $^1\text{H}$  NMR spectrum of 3 in  $\text{CD}_3\text{OD}$

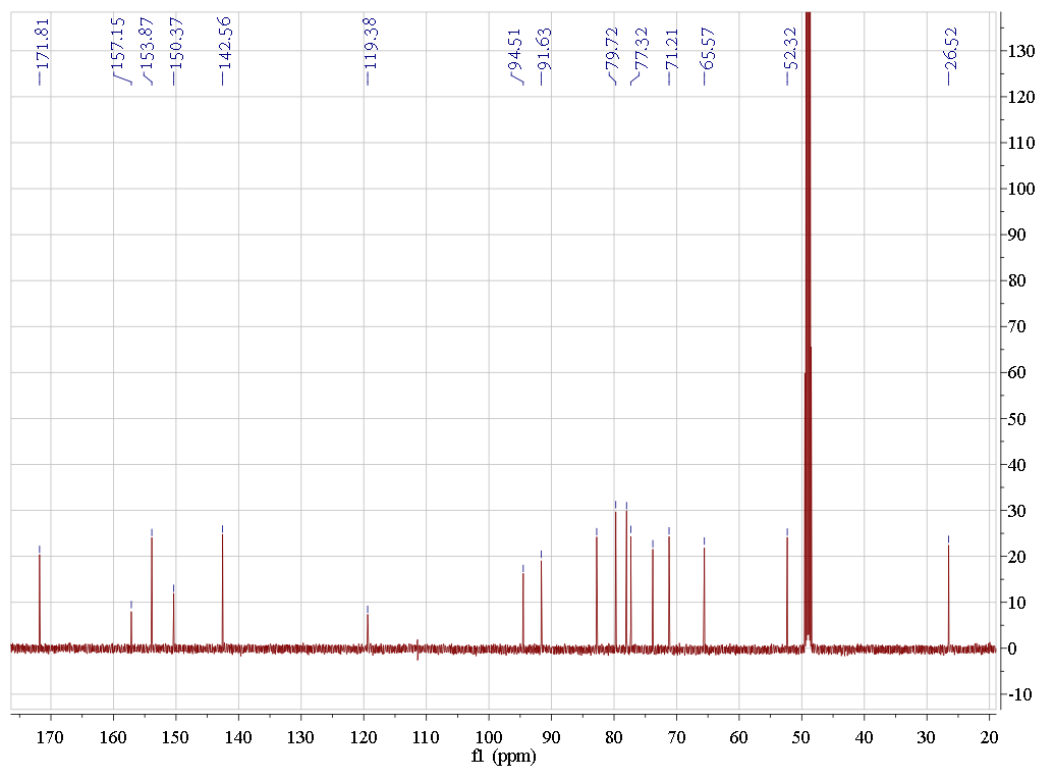

Figure S44  $^{13}\text{C}$  NMR spectrum of 3 in  $\text{CD}_3\text{OD}$

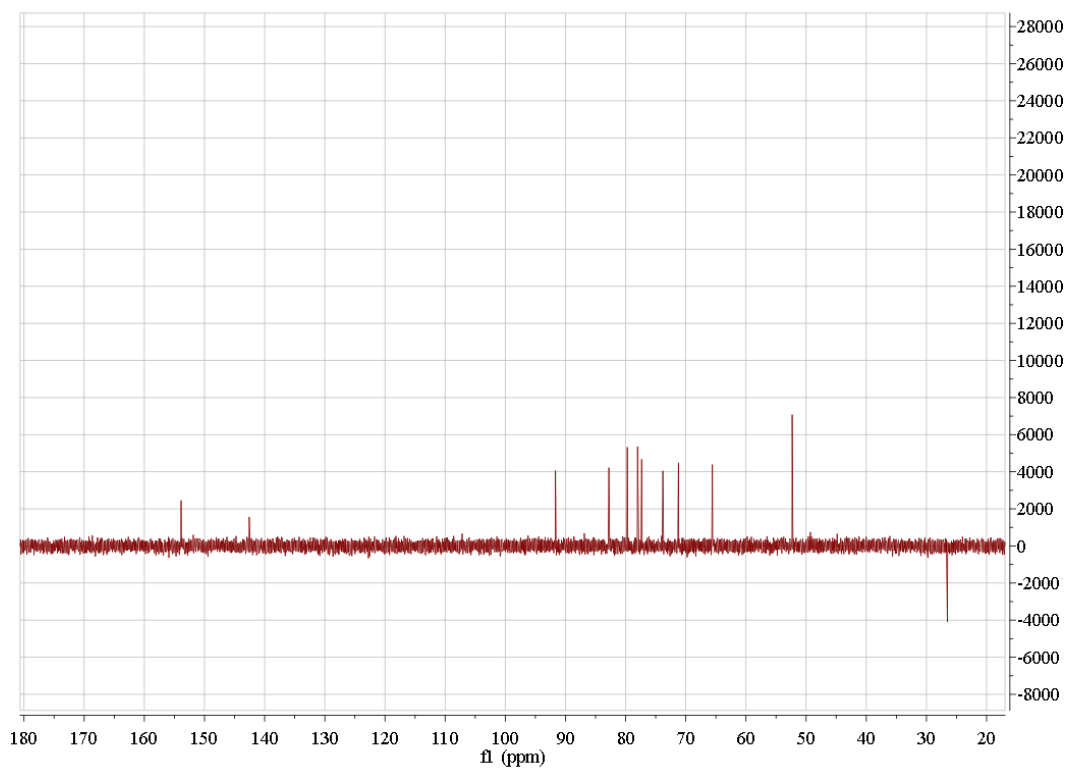

Figure S45 DEPT135 spectrum of 3 in CD<sub>3</sub>OD

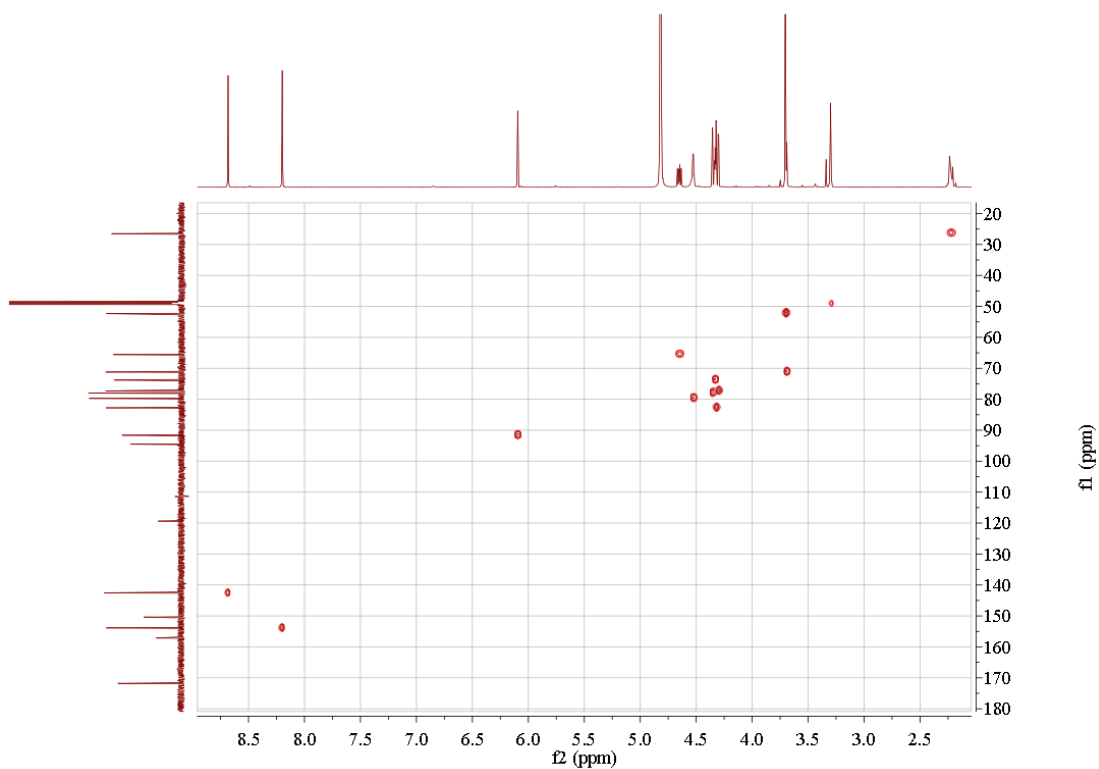

Figure S46 HSQC spectrum of 3 in CD<sub>3</sub>OD

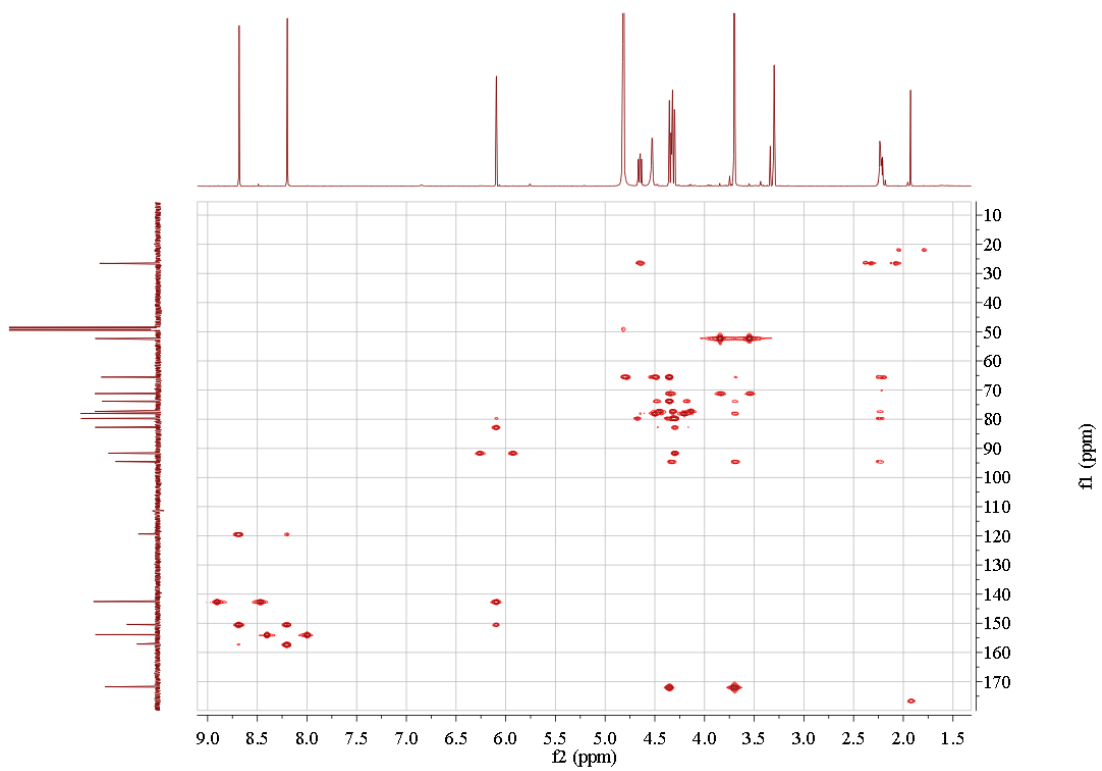

Figure S47 HMBC spectrum of **3** in CD<sub>3</sub>OD

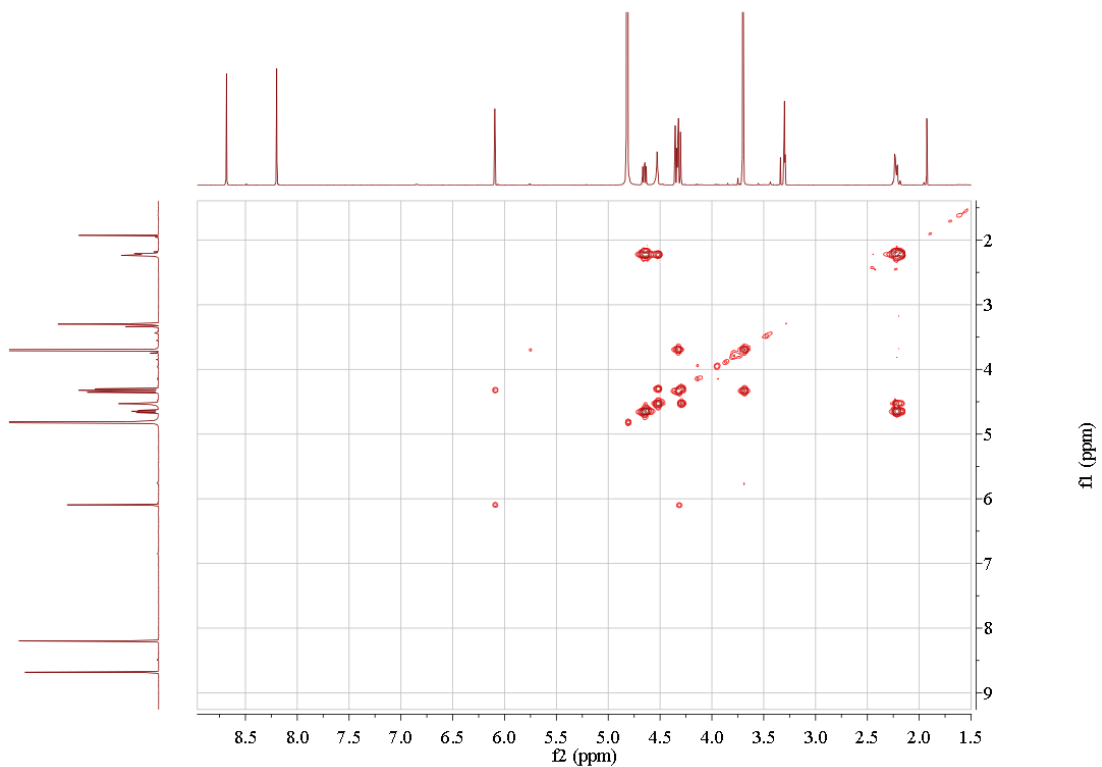

Figure S48 <sup>1</sup>H-<sup>1</sup>H COSY spectrum of **3** in CD<sub>3</sub>OD

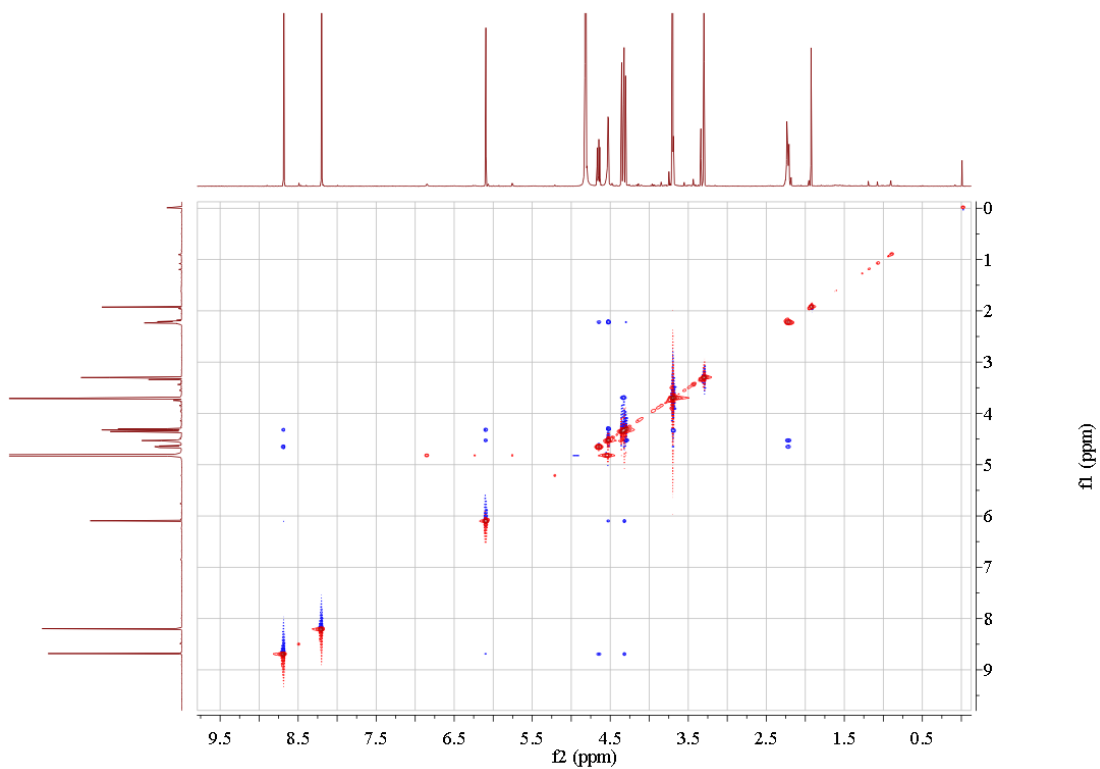

Figure S49 NOESY spectrum of 3 in CD<sub>3</sub>OD

National Center for Organic Mass Spectrometry in Shanghai  
 Shanghai Institute of Organic Chemistry  
 Chinese Academic of Sciences  
 High Resolution MS DATA REPORT

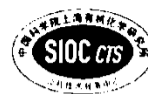

Instrument: Thermo Fisher Scientific LTQ FT Ultra

Card Serial Number : E170045

Sample Serial Number: ZTF440b

Operator :zhu fj Date: 2016/12/16

Operation Mode: DART Positive

Elemental composition search on mass 440.14

m/z= 435.14-445.14

| m/z      | Theo. Mass | Delta (ppm) | RDB equiv. | Composition                                                   |
|----------|------------|-------------|------------|---------------------------------------------------------------|
| 440.1417 | 440.1412   | 1.06        | 9.5        | C <sub>17</sub> H <sub>22</sub> O <sub>9</sub> N <sub>5</sub> |

Figure S50 HRMS data of 3



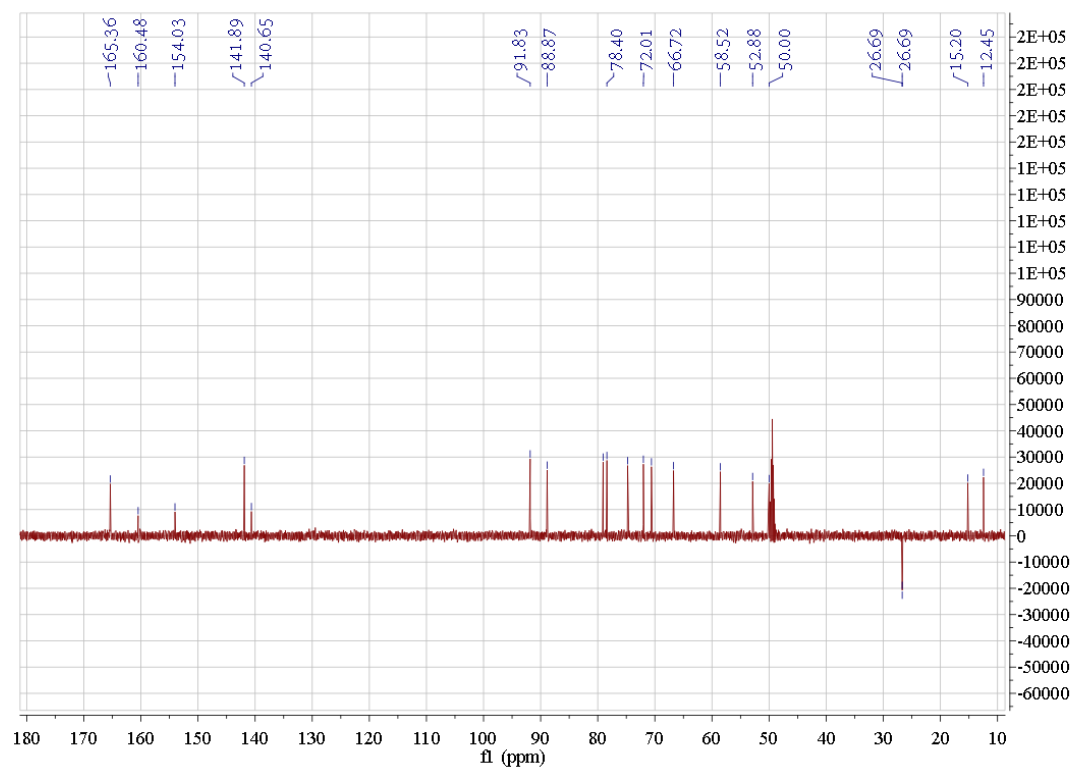

Figure S53 DEPT135 spectrum of 5 in CD<sub>3</sub>OD

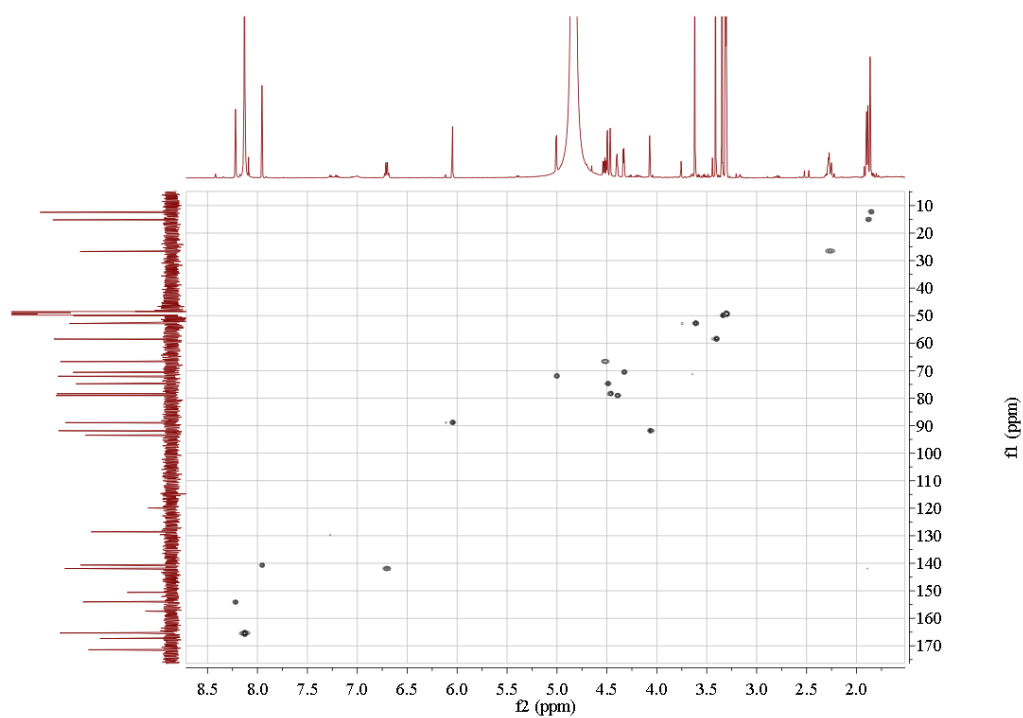

Figure S54 HSQC spectrum of 5 in CD<sub>3</sub>OD

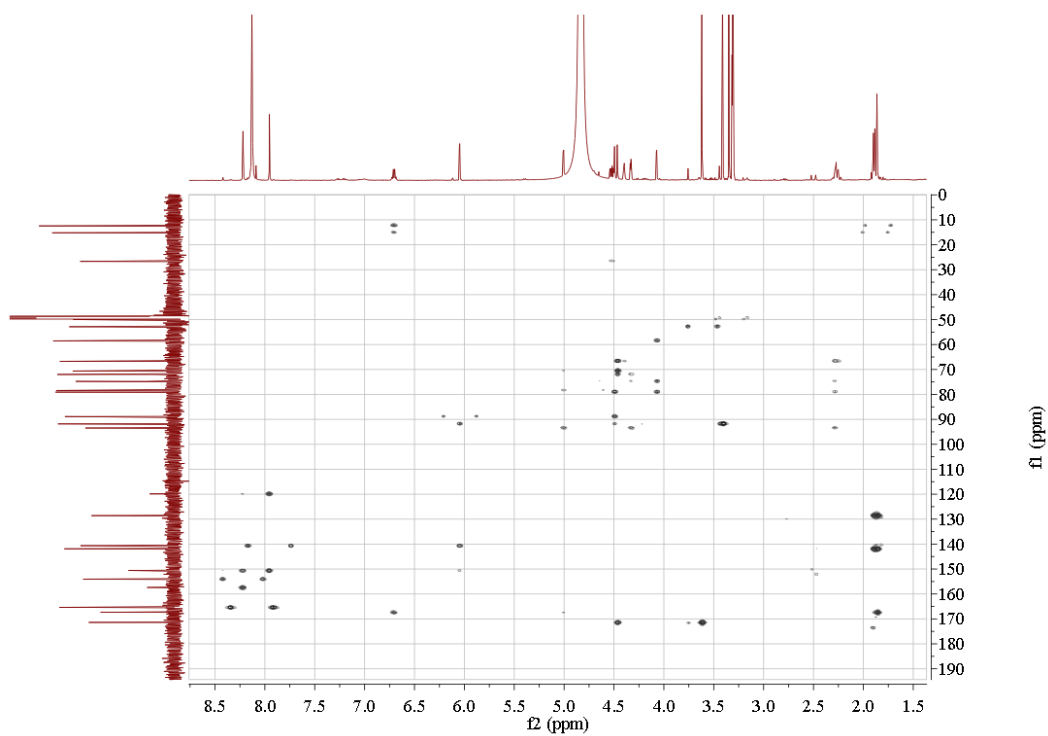

Figure S55 HMBC spectrum of 5 in CD<sub>3</sub>OD

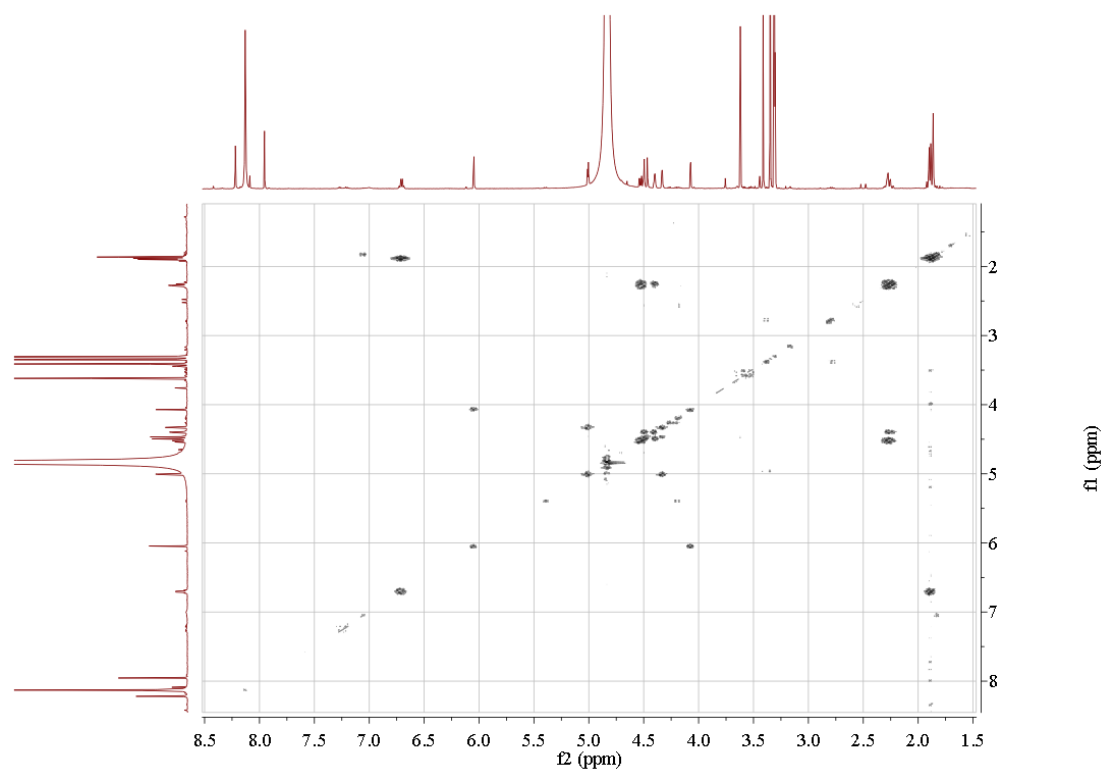

Figure S56 <sup>1</sup>H-<sup>1</sup>H COSY spectrum of 5 in CD<sub>3</sub>OD

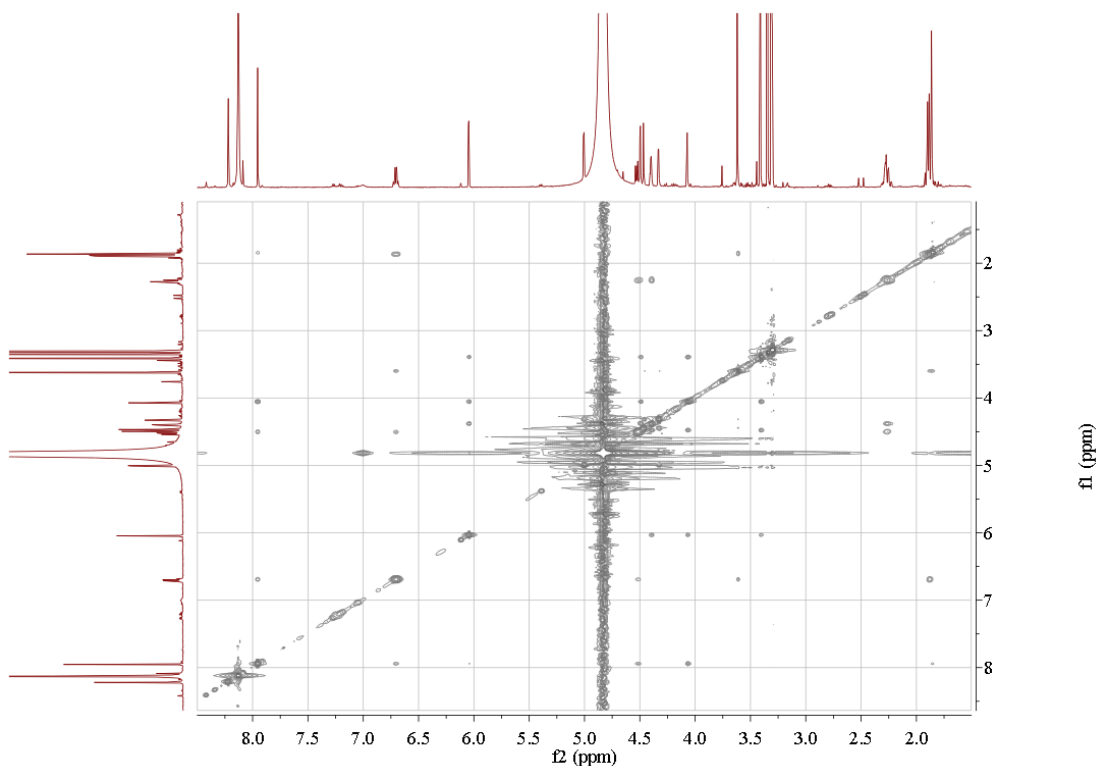

Figure S57 NOESY spectrum of 5 in CD<sub>3</sub>OD

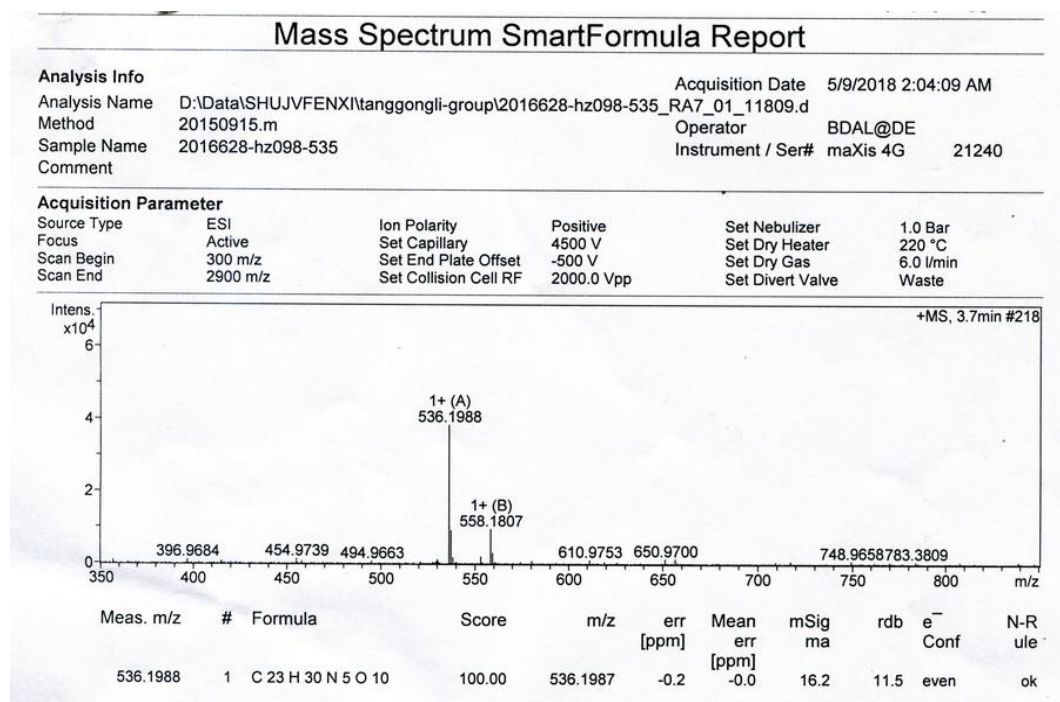

Figure S58 HRMS data of 5



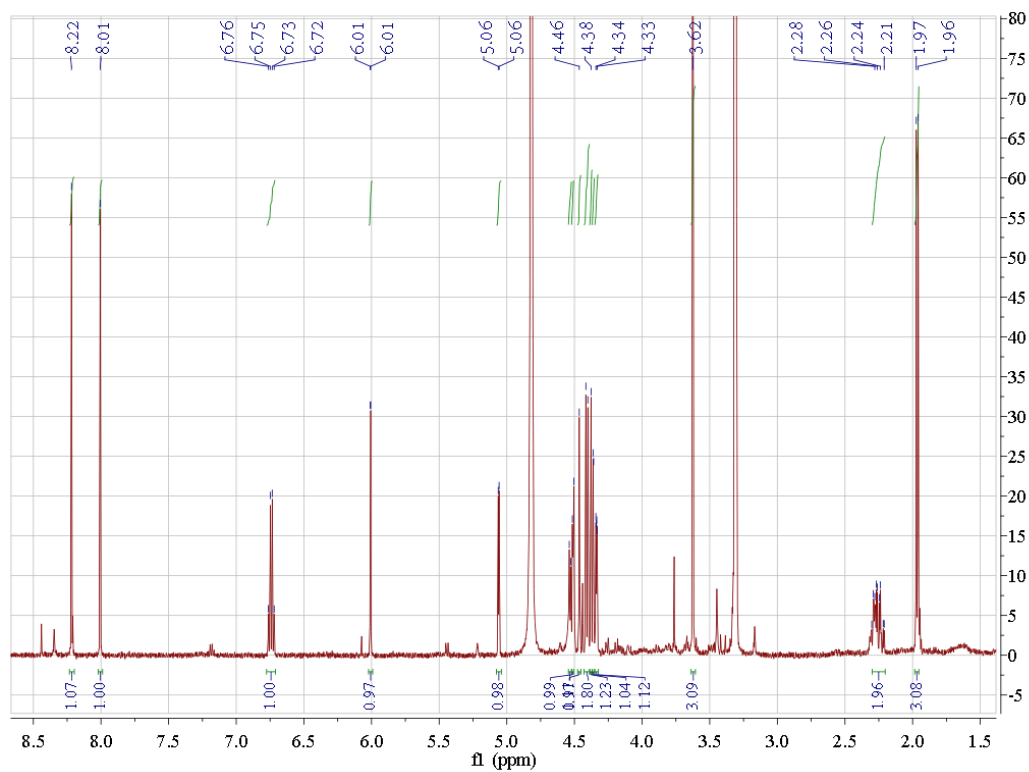

Figure S59  $^1\text{H}$  NMR spectrum of 11 in  $\text{CD}_3\text{OD}$

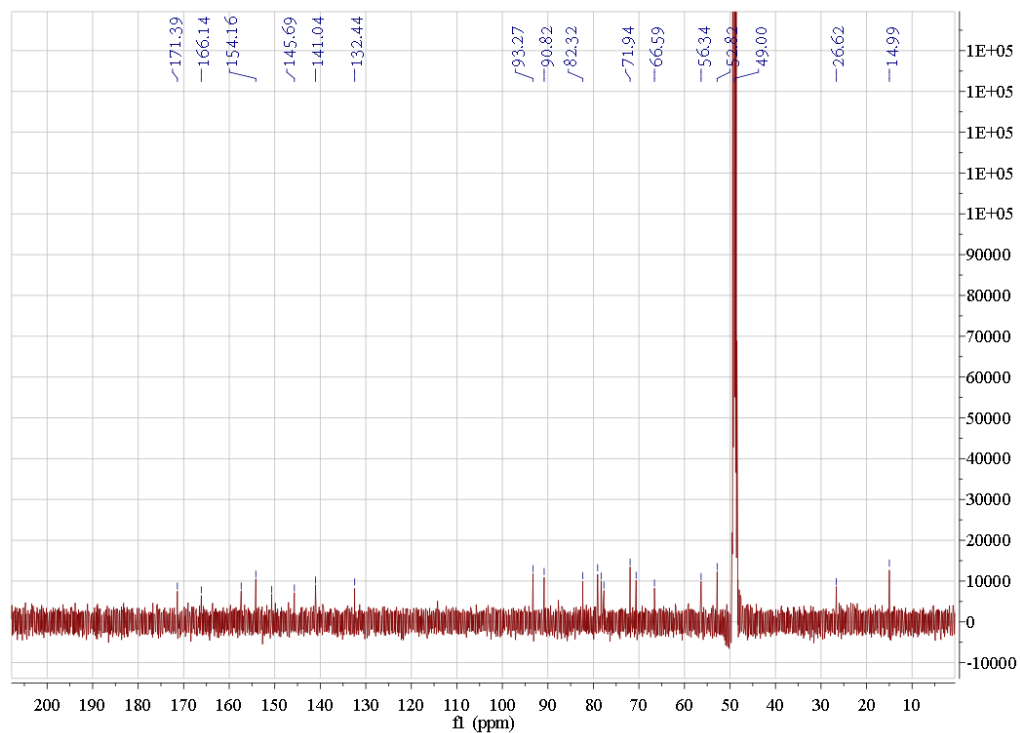

Figure S60  $^{13}\text{C}$  NMR spectrum of 11 in  $\text{CD}_3\text{OD}$

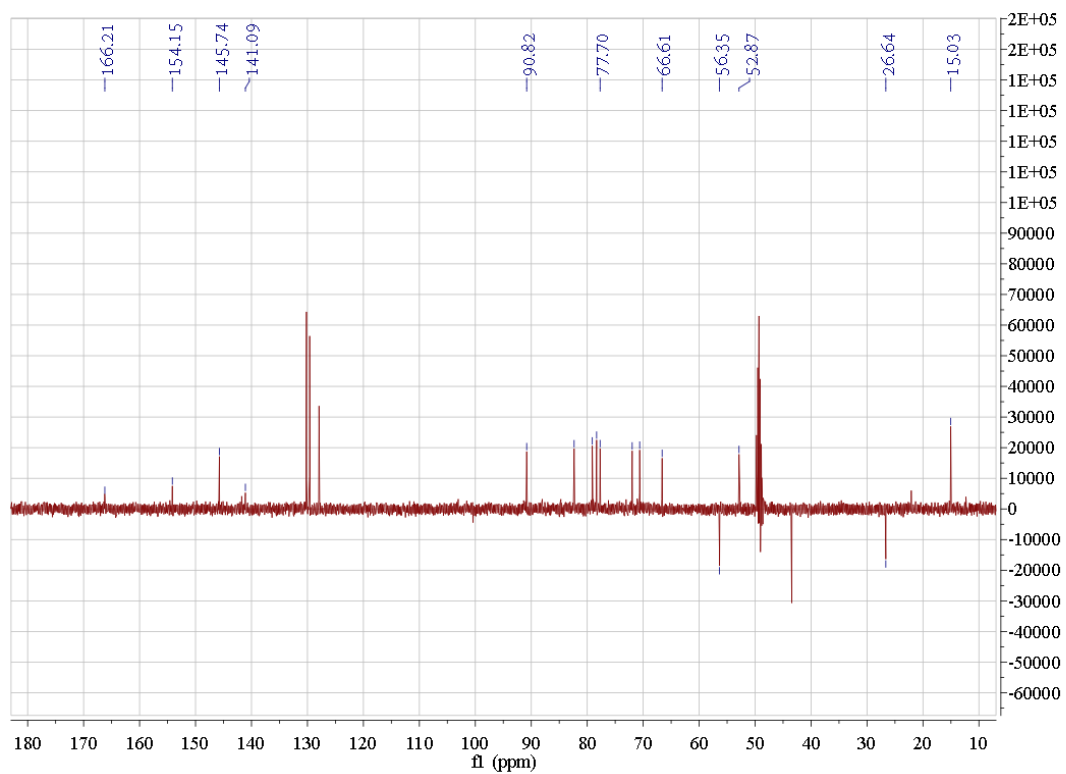

Figure S61 DEPT135 spectrum of 11 in CD<sub>3</sub>OD

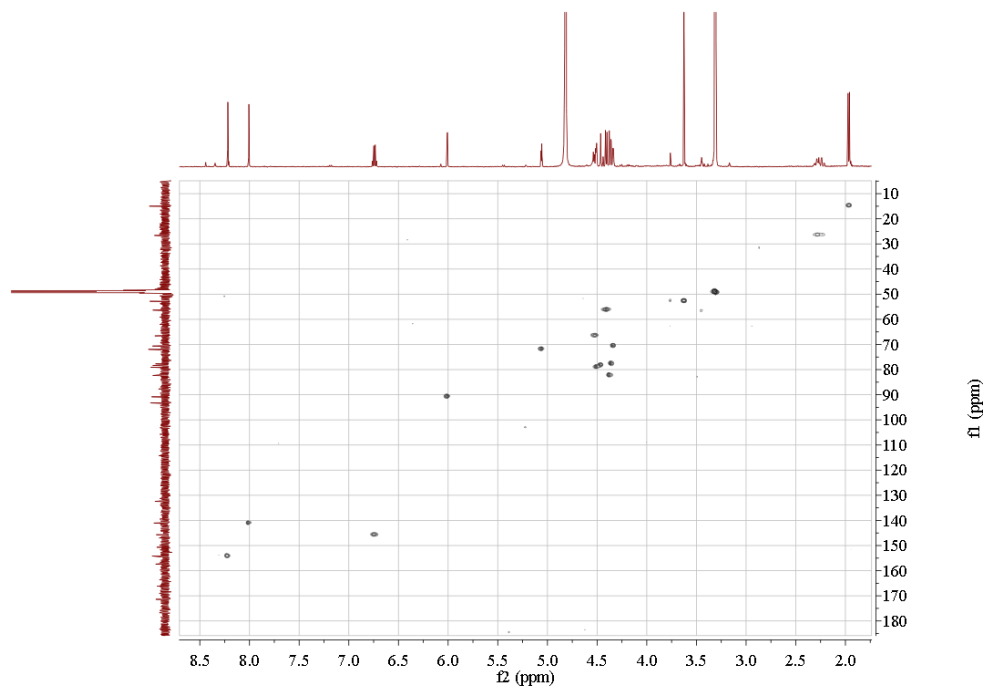

Figure S62 HSQC spectrum of 11 in CD<sub>3</sub>OD

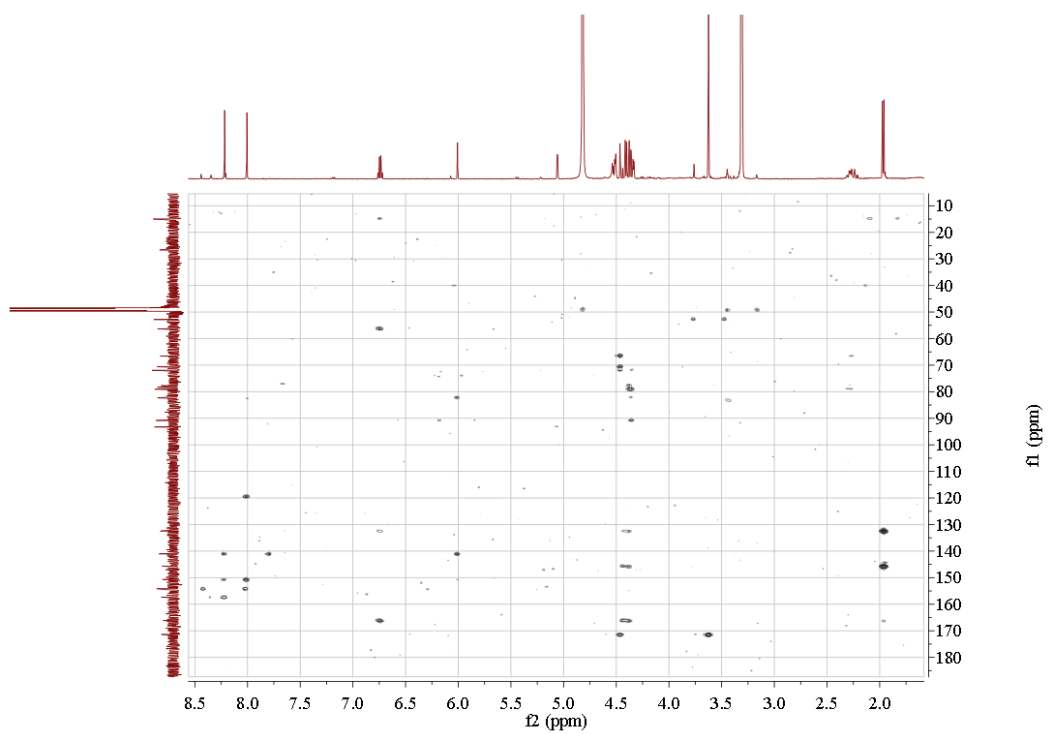

Figure S63 HMBC spectrum of 11 in CD<sub>3</sub>OD

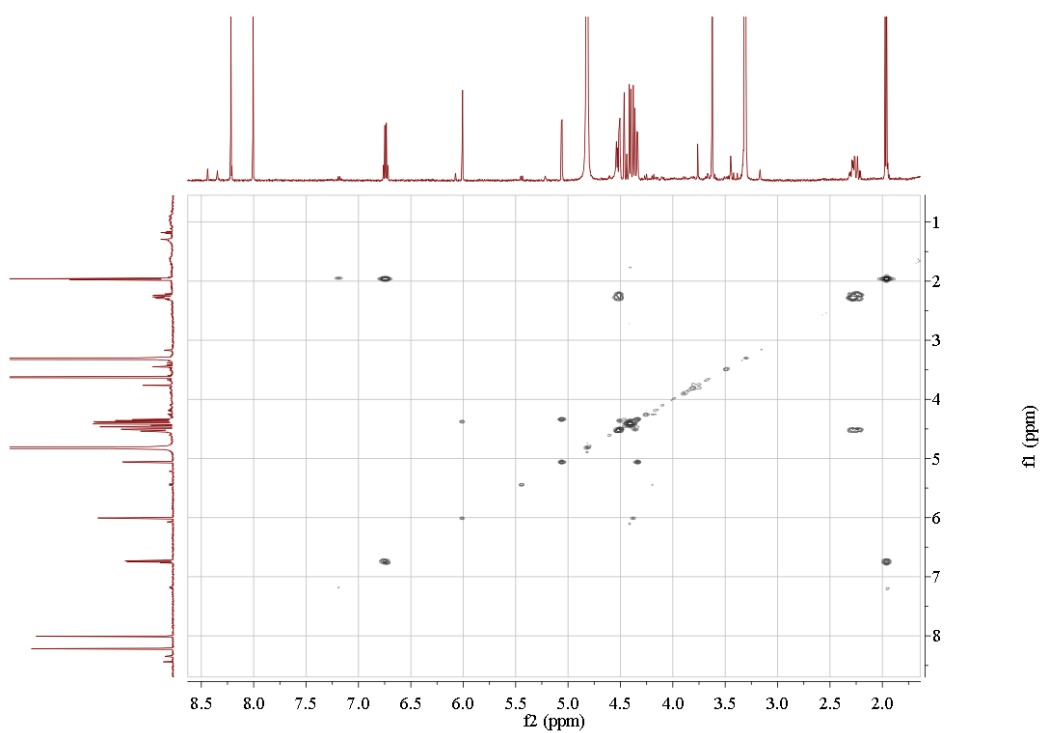

Figure S64 <sup>1</sup>H-<sup>1</sup>H COSY spectrum of 11 in CD<sub>3</sub>OD

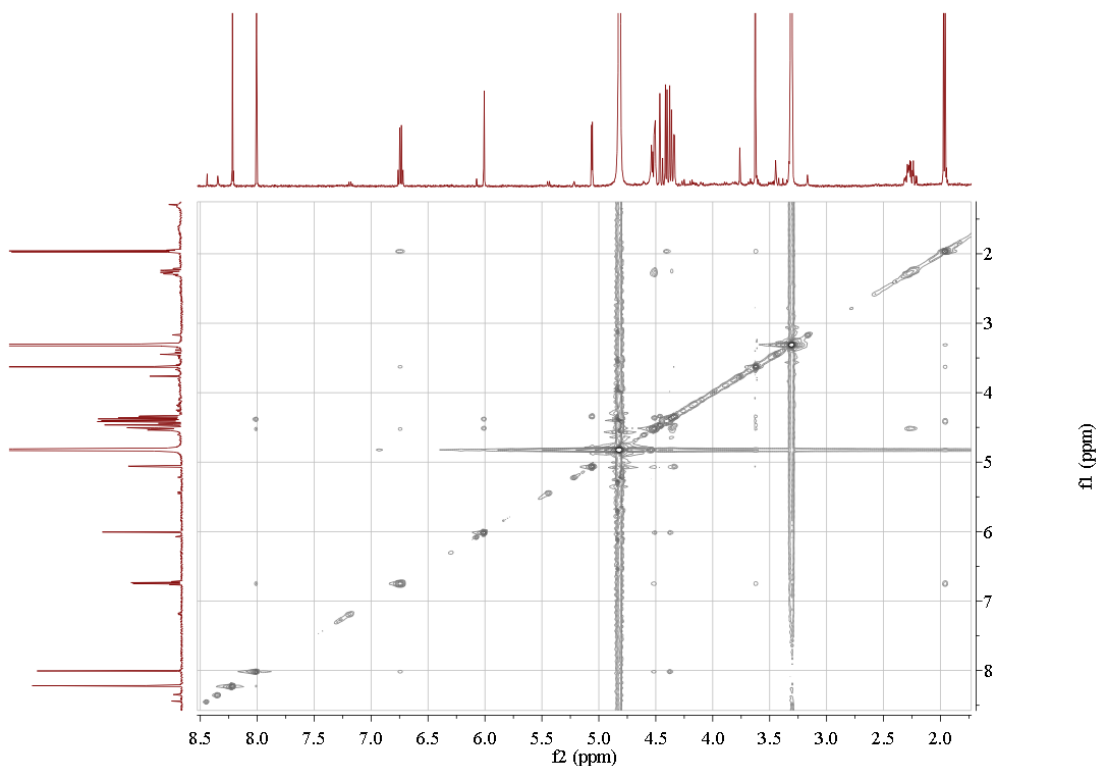

Figure S65 NOESY spectrum of 11 in CD<sub>3</sub>OD

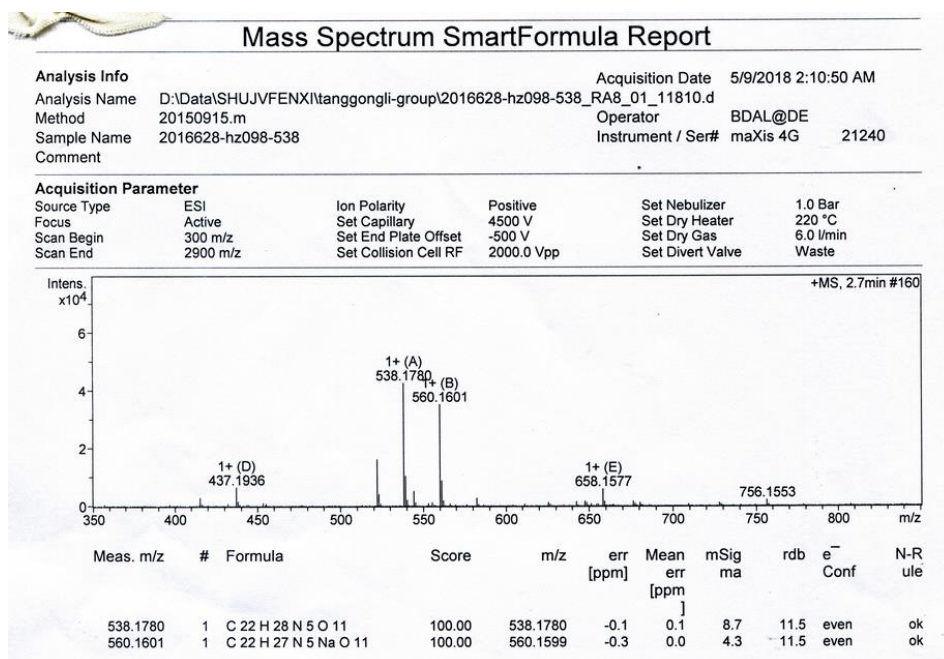

Figure S66 HRMS data of 11

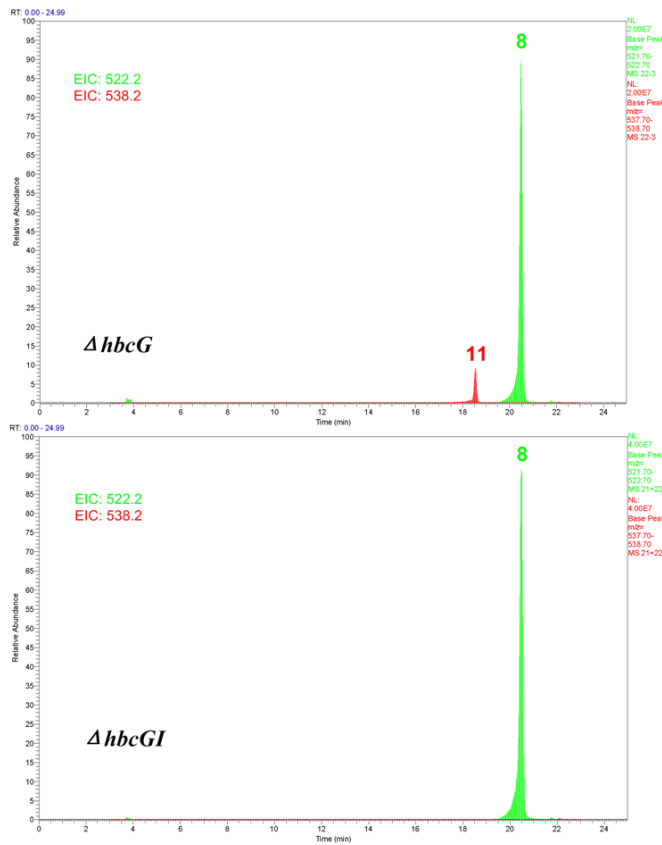

**Figure S67 LC-MS analysis of *S. sp* KIB-027 derived gene knock-out mutants,  $\Delta hbcG$  and  $\Delta hbcGI$ .**

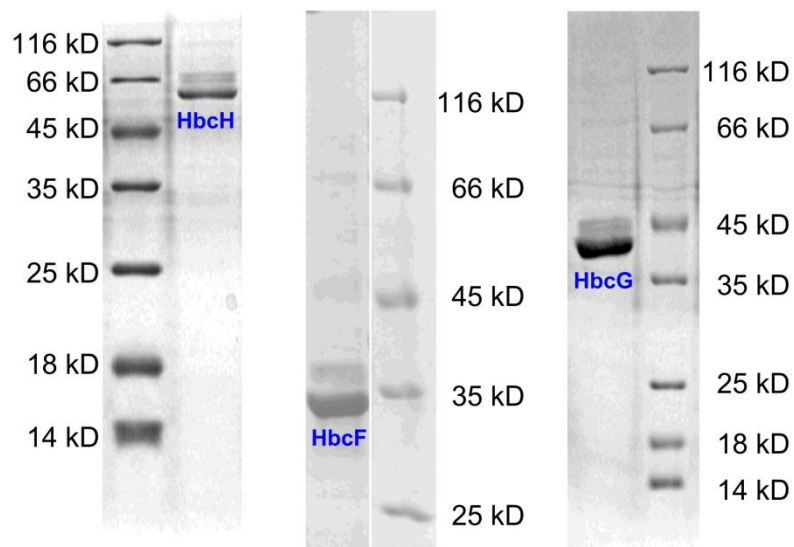

**Figure S68 SDS-PAGE analysis of the purified proteins HbcH (61.4 kDa), HbcF (33.0 kDa) and HbcG (41.4 kDa).**

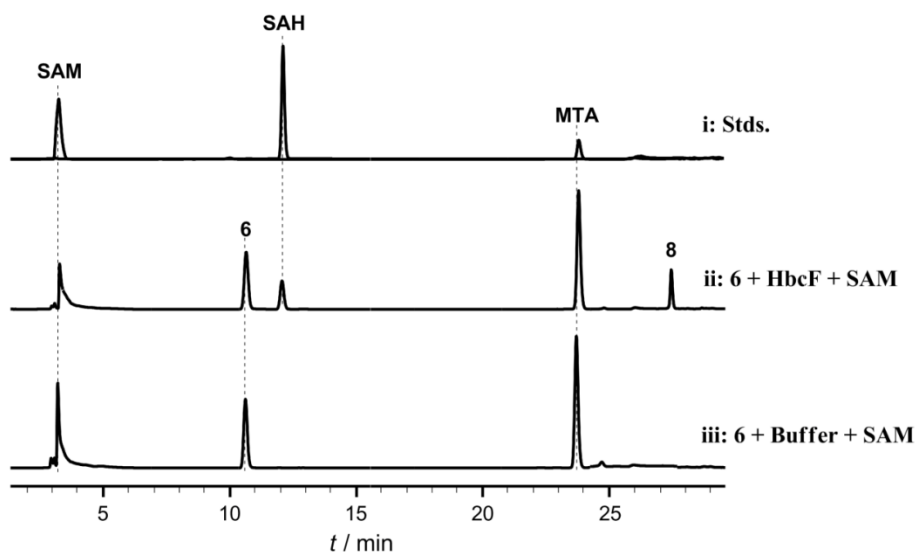

**Figure S69** *In vitro* assay of HbcF with 6 as substrate using HPLC method 2

(0.8 mL/min, 260 nm, T = 0 min, 4% B; T = 4 min, 4 % B; T = 25 min, 80% B; T = 28 min, 80% B; T = 30 min, 4% B; (A = H<sub>2</sub>O, B = CH<sub>3</sub>OH)).

(Note: Using the common HPLC method for *in vitro* experiments, 6 was co-eluted with 5'-deoxy-5'-methylthioadenosine (MTA), see Figure 3, i)

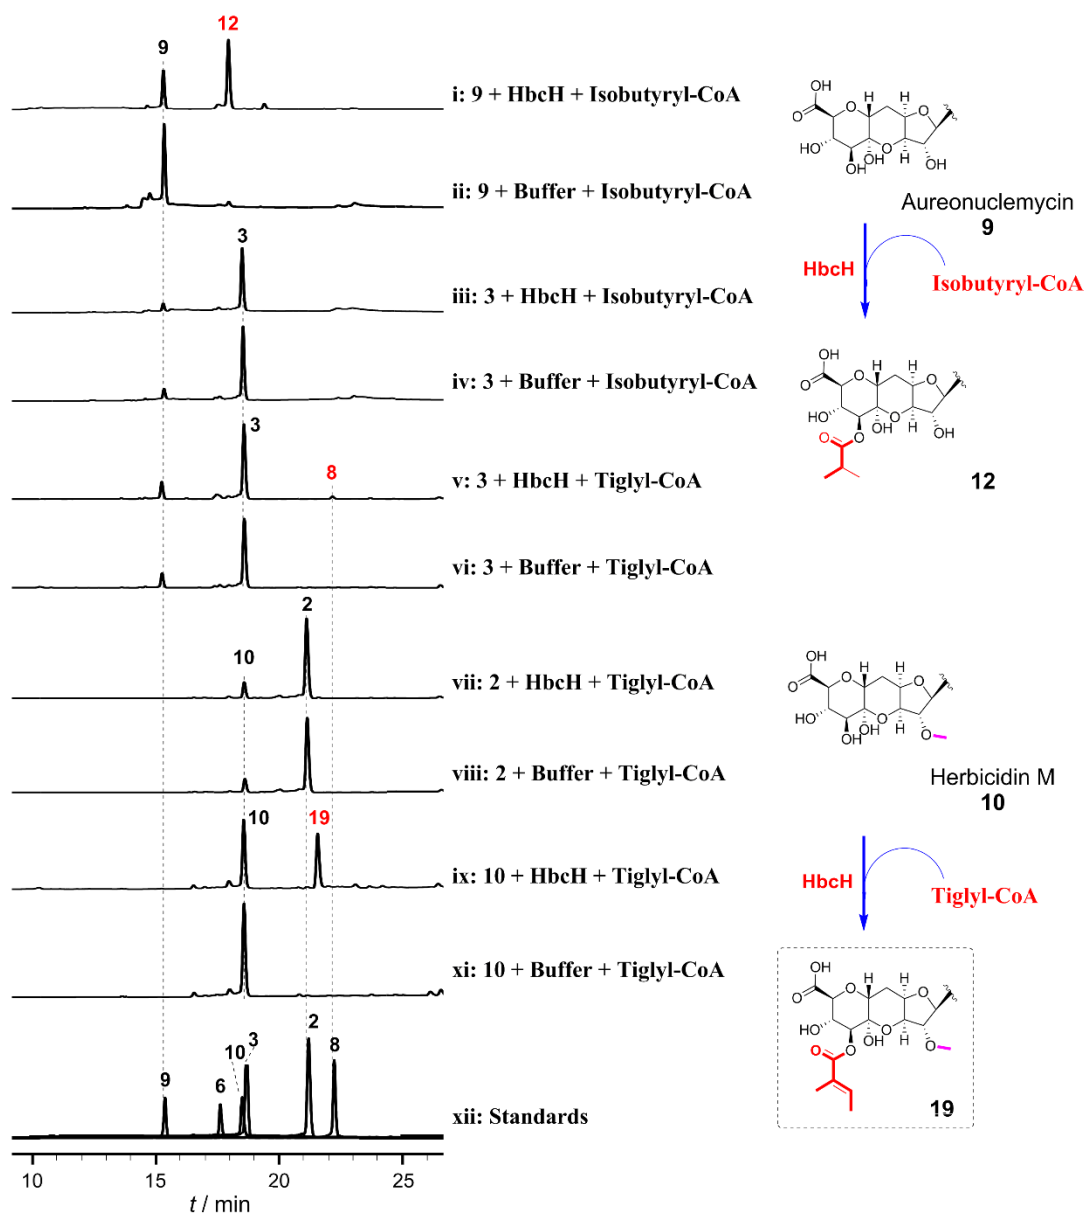

Figure S70 *In vitro* assay of HbcH with 9, 3, 2 and 10 as substrates.

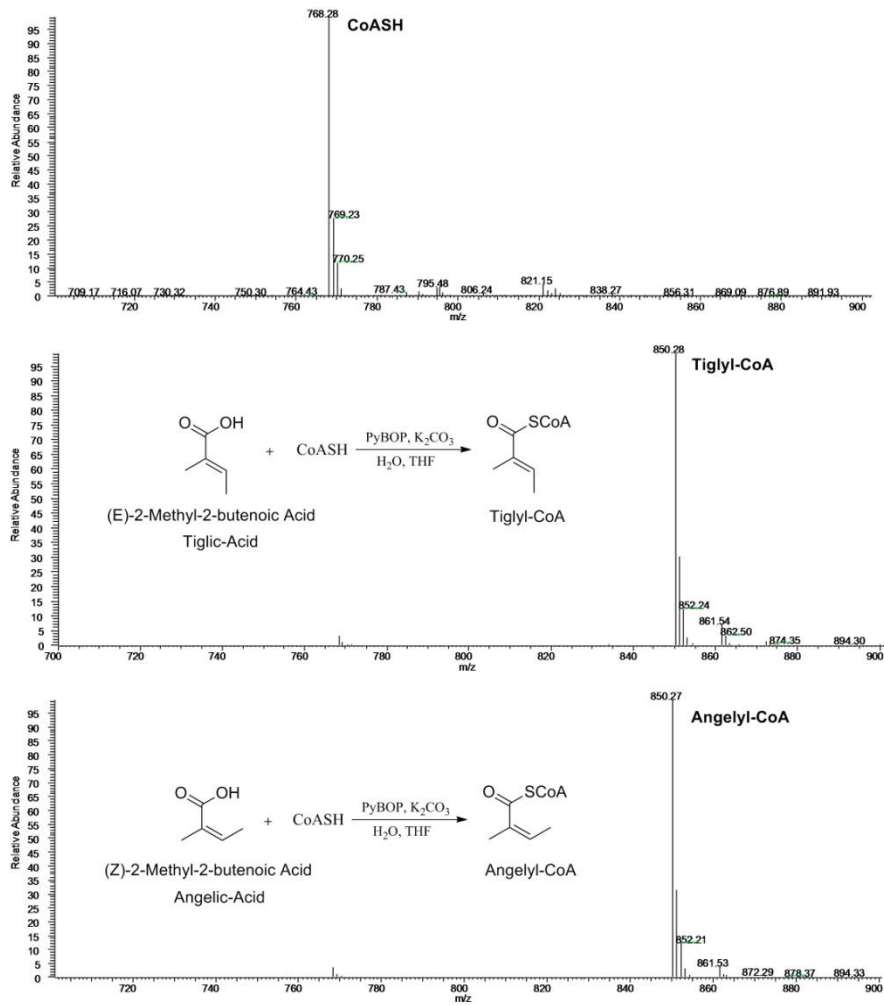

**Figure S71** Chemical synthesis of tiglyl-CoA and angelyl-CoA.

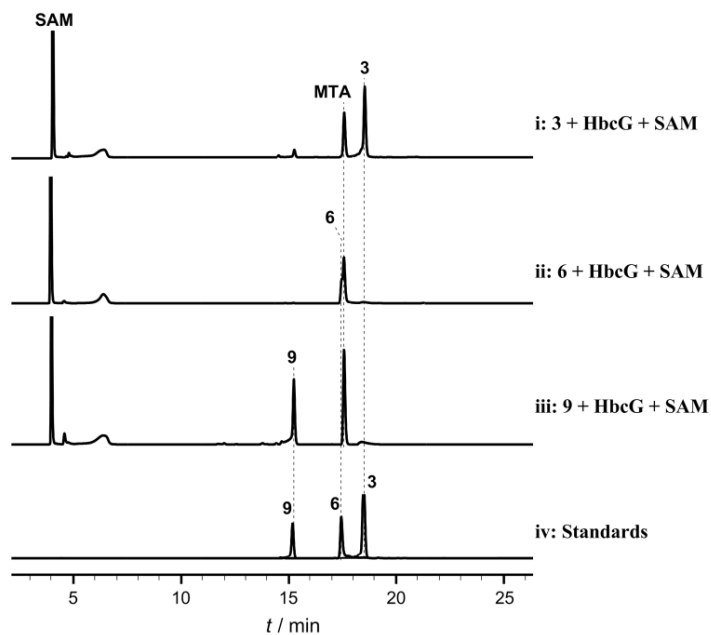

**Figure S72** *In vitro* assay of HbcG with 3, 6 and 9 as substrates.



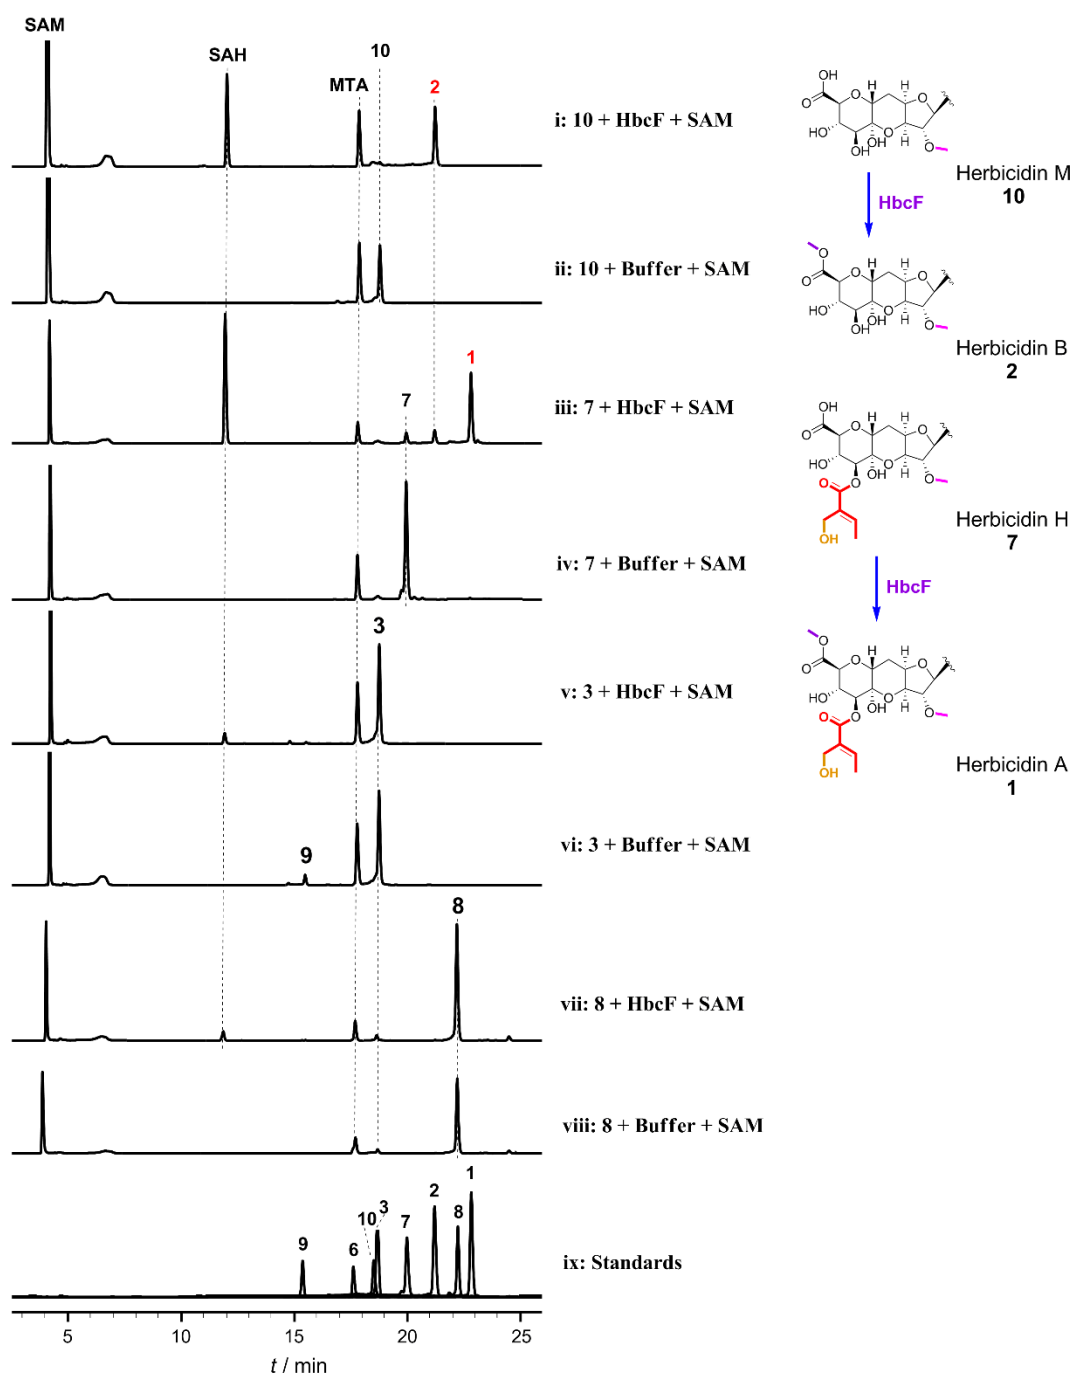

Figure S73 *In vitro* assay of HbcF with 10, 7, 3 and 8 as substrates.

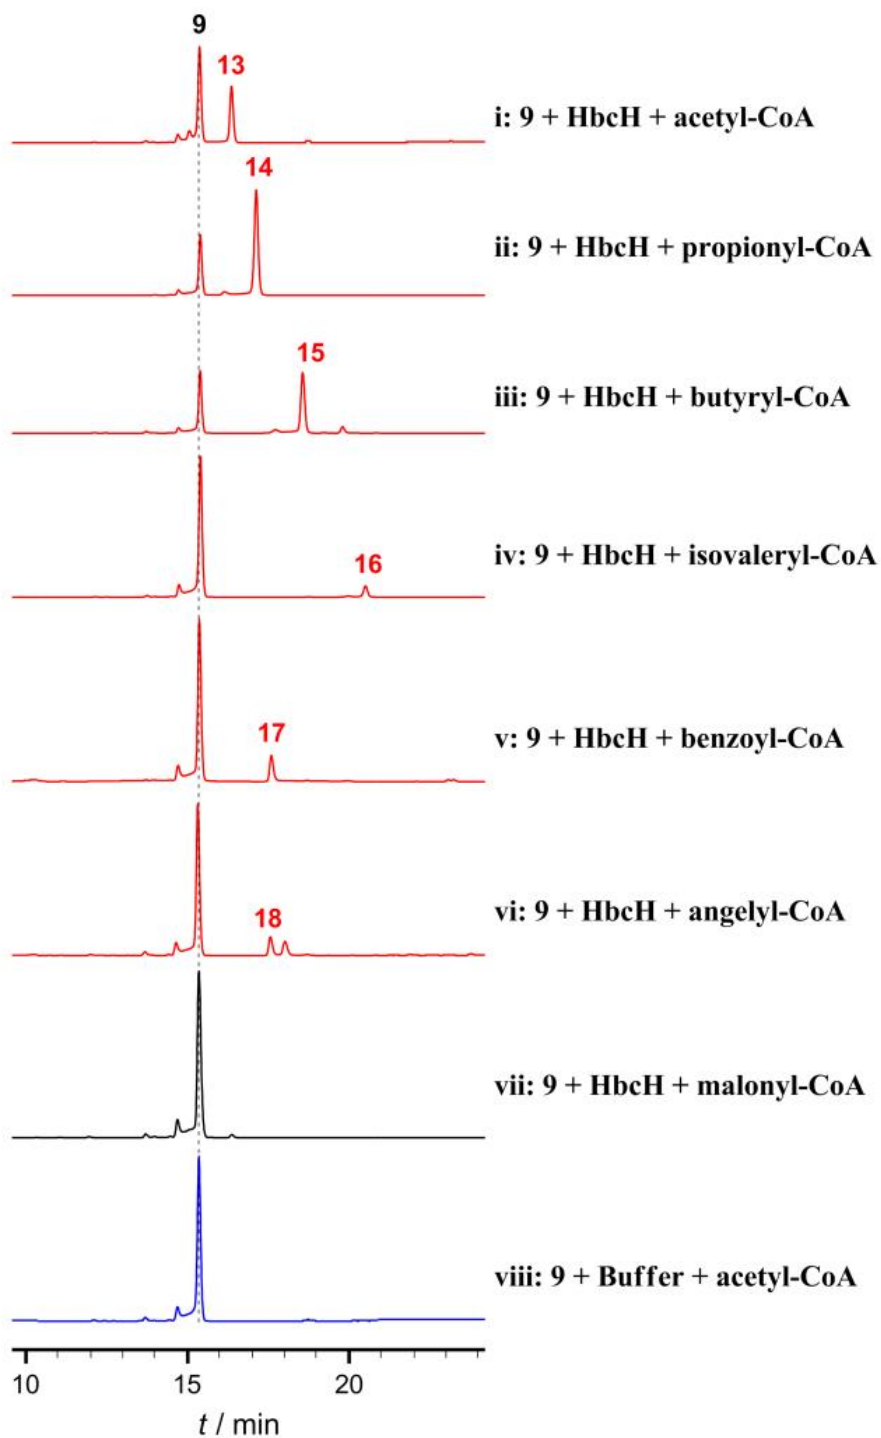

**Figure S74** *In vitro* assay of HbcH with 9 as substrate and various acyl donors including: i) acetyl-CoA, ii) propionyl-CoA, iii) butyryl-CoA, iv) isovaleryl-CoA, v) benzoyl-CoA, vi) angelyl-CoA, and vii) malonyl-CoA. viii) control reaction.

Avr-Bu-CoA\_Hu23\_180710\_nkaid #281-2874 RT: 17.84-18.01 AV: 64 NL: 1.02E6

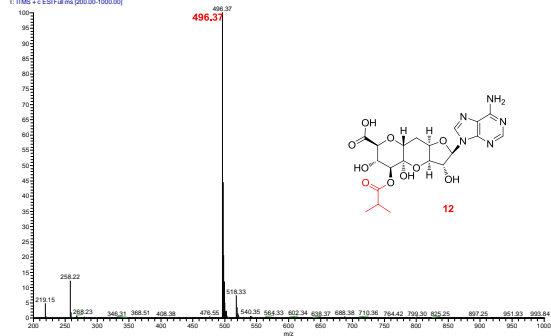

Avr\_A-CoA\_Hu23 #2451-2489 RT: 15.41-15.63 AV: 39 NL: 1.22E6

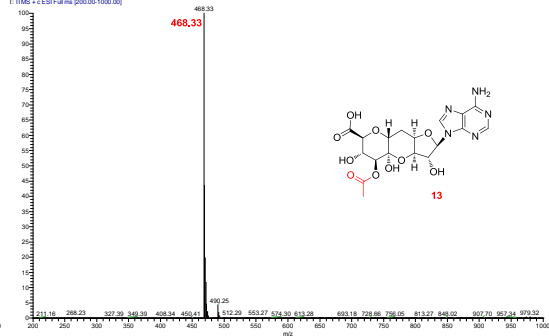

Avr\_P-CoA\_Hu23 #2633-2680 RT: 16.56-16.82 AV: 48 NL: 2.05E5

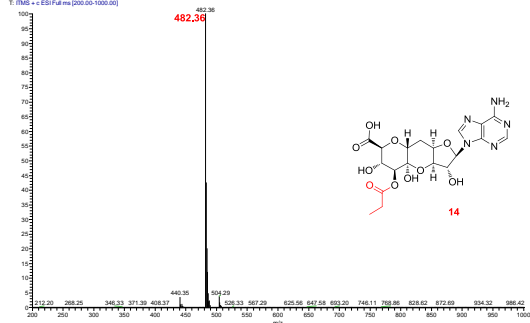

Avr\_A-CoA\_Hu23 #2020-2079 RT: 16.37-16.71 AV: 60 NL: 1.67E6

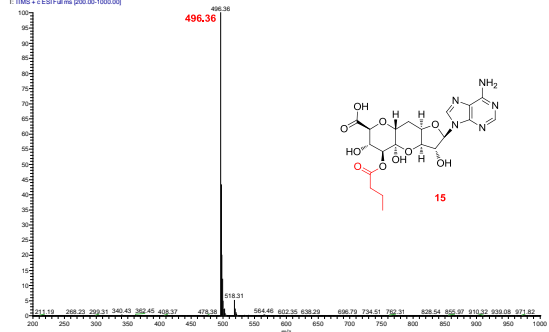

Avr\_A-CoA\_Hu23 #3231-3284 RT: 20.33-20.53 AV: 34 NL: 6.51E5

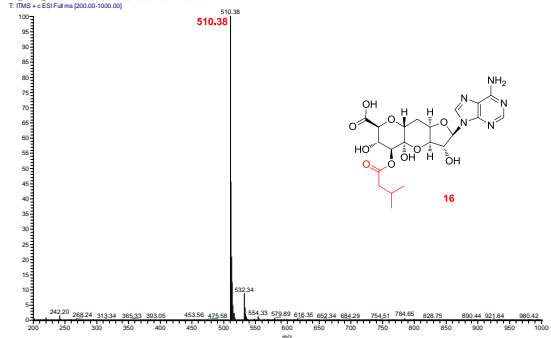

BuCoA\_Hu23 Avr #2750-2856 RT: 17.49-17.86 AV: 64 NL: 9.30E5

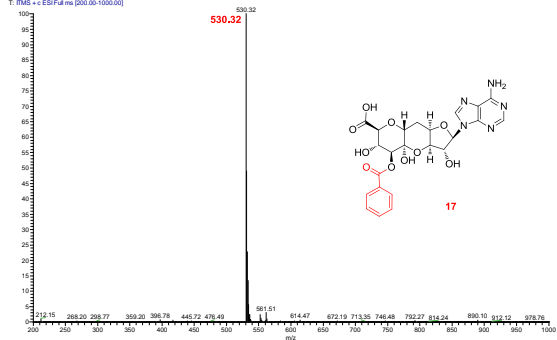

Avr-A-CoA\_Hu23\_180710\_8743-9798 RT: 17.16-17.49 AV: 58 NL: 8.46E5

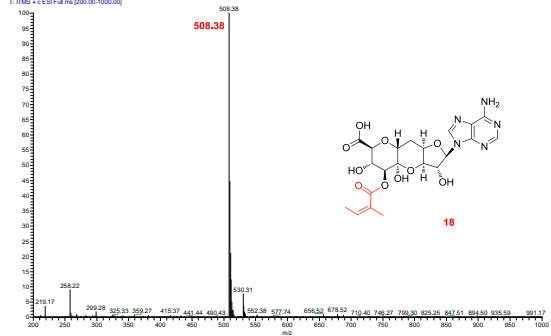

5-Hu7400 CoA #3341-3393 RT: 20.58-20.88 AV: 53 NL: 5.33E6

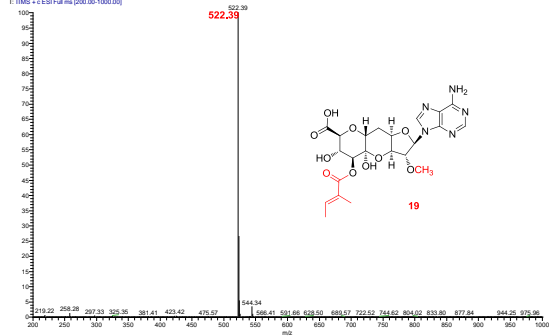

Figure S75 Mass spectra for 12-19 and the putative structures of these compounds.

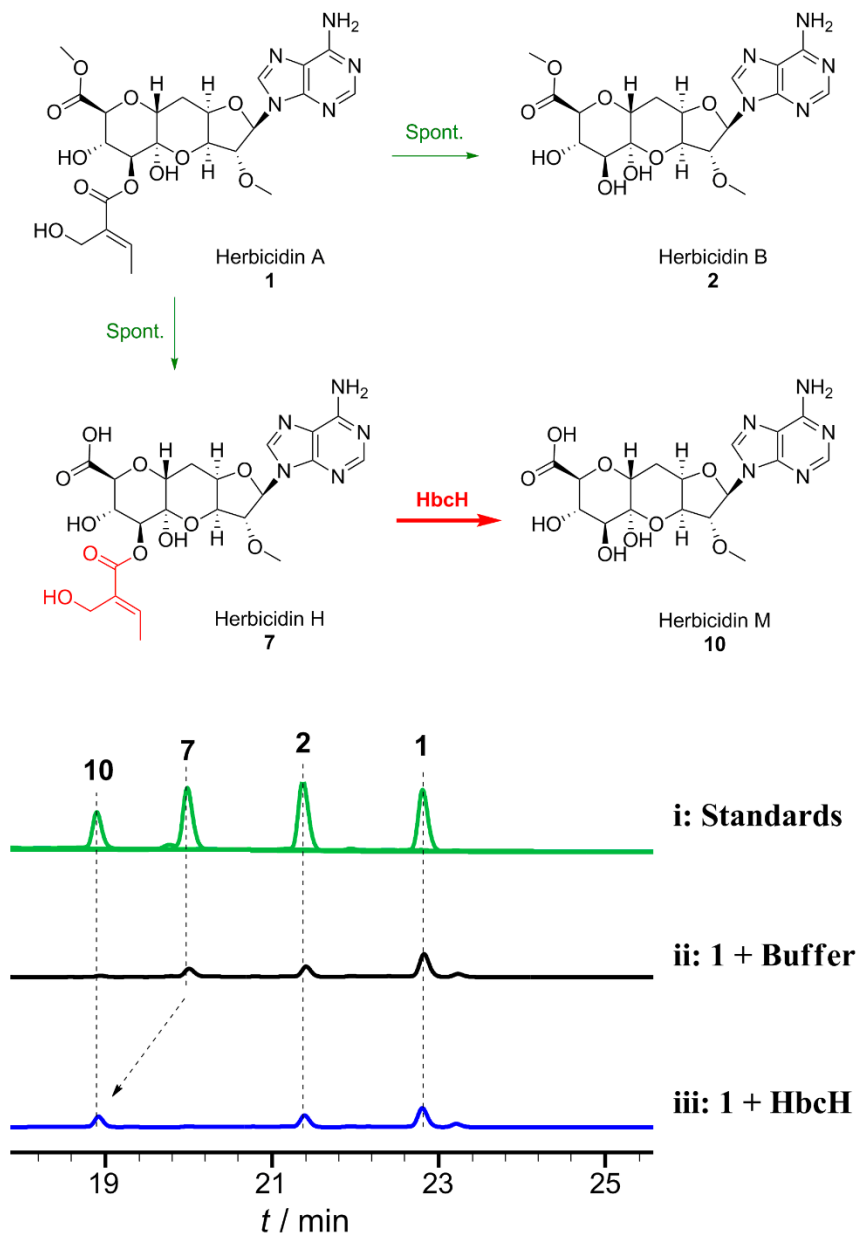

Figure S76 *In vitro* assay of the hydrolytic activity of HbcH with 1 as substrate.

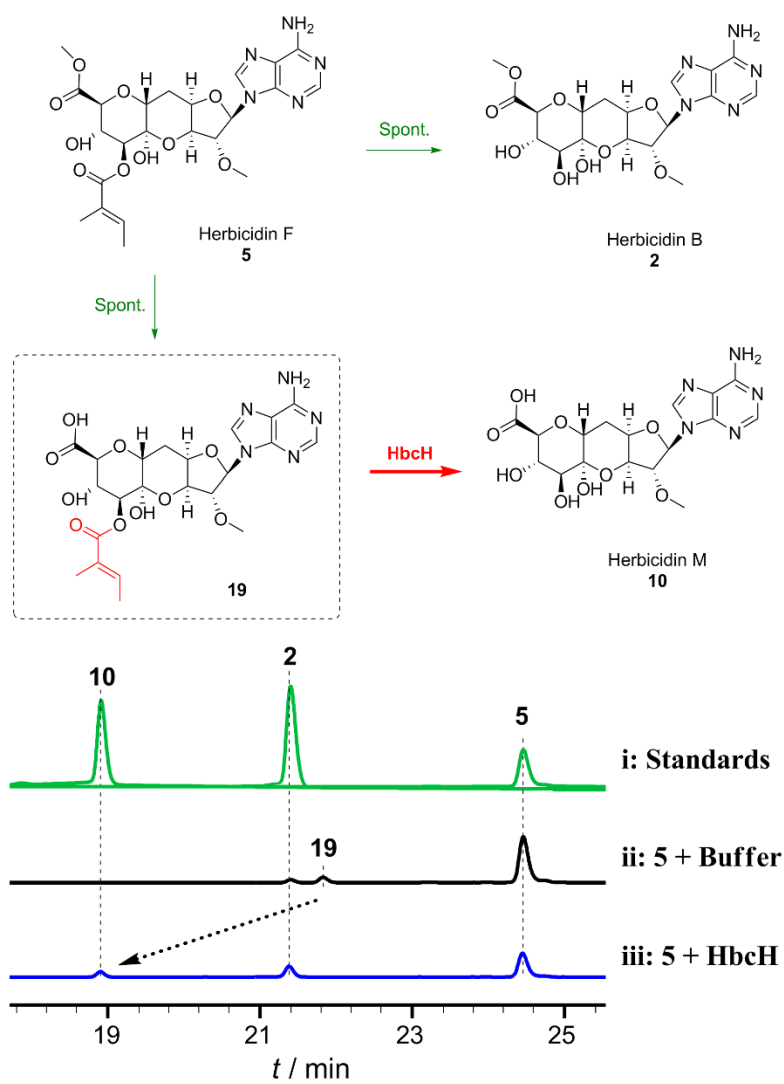

**Figure S77** *In vitro* assay of the hydrolytic activity of HbcH with 5 as substrate.

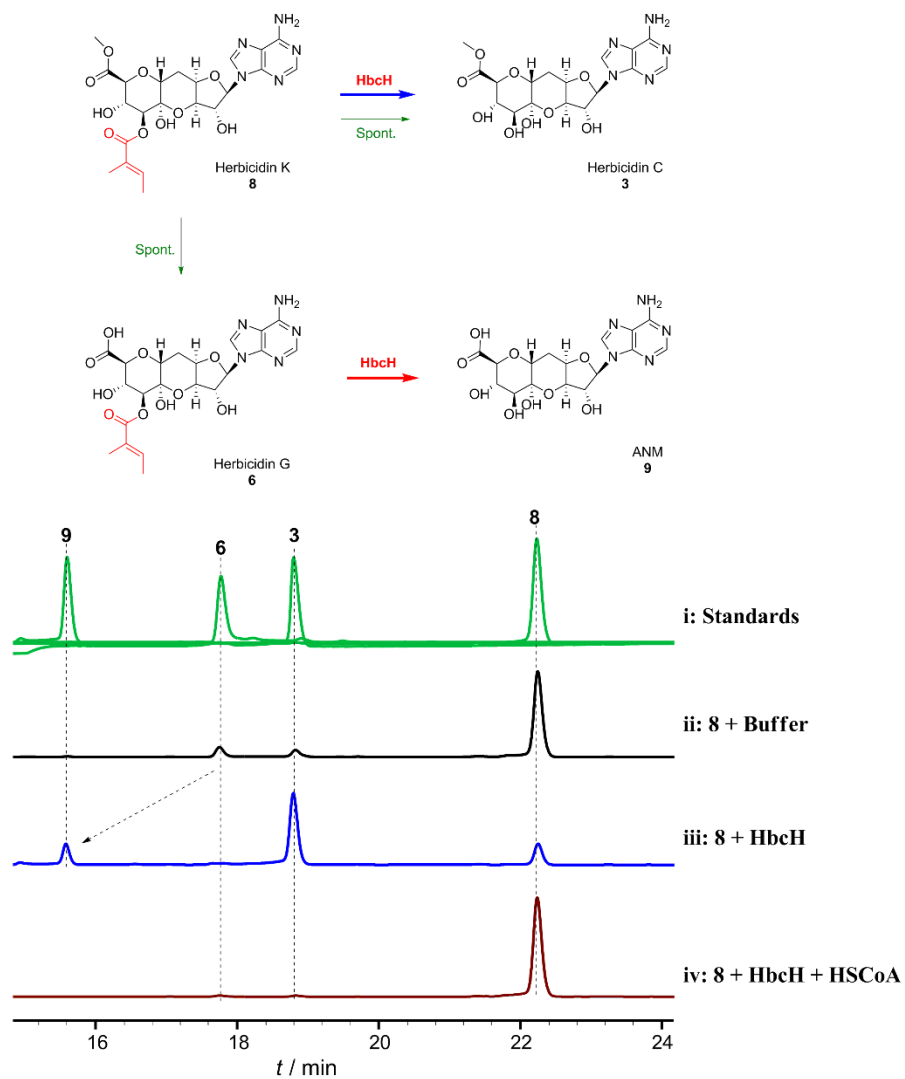

**Figure S78** *In vitro* assay of the hydrolytic activity of HbcH with 8 as substrate.

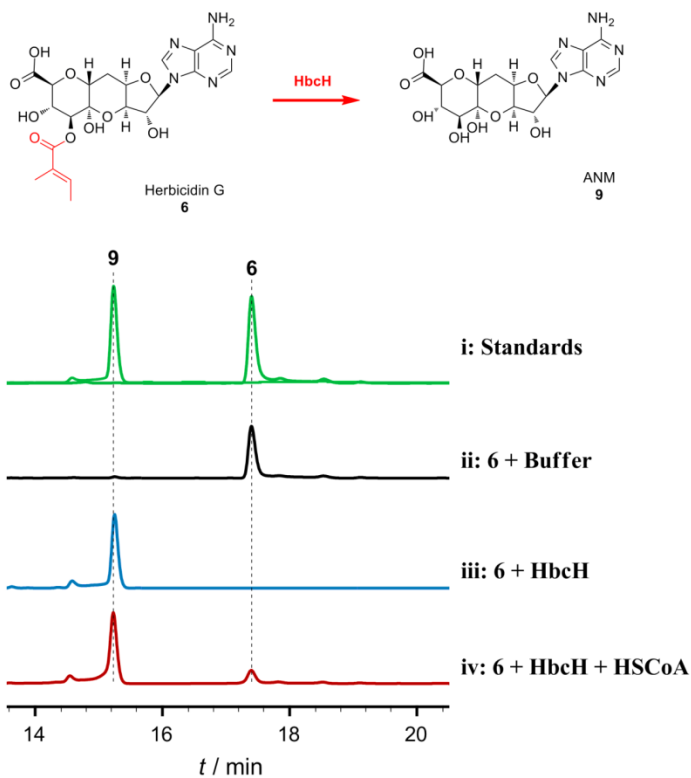

Figure S79 *In vitro* assay of the hydrolytic activity of HbcH with 6 as substrate.

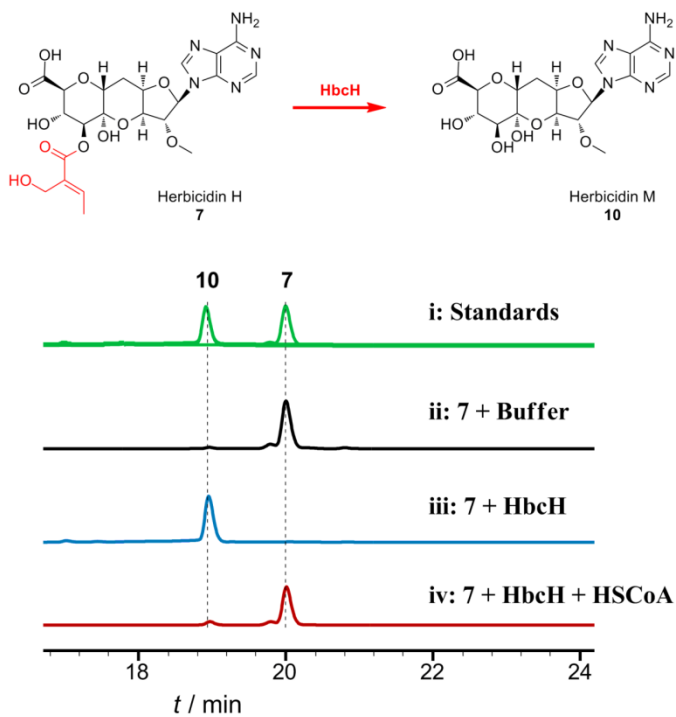

Figure S80 *In vitro* assay of the hydrolytic activity of HbcH with 7 as substrate.

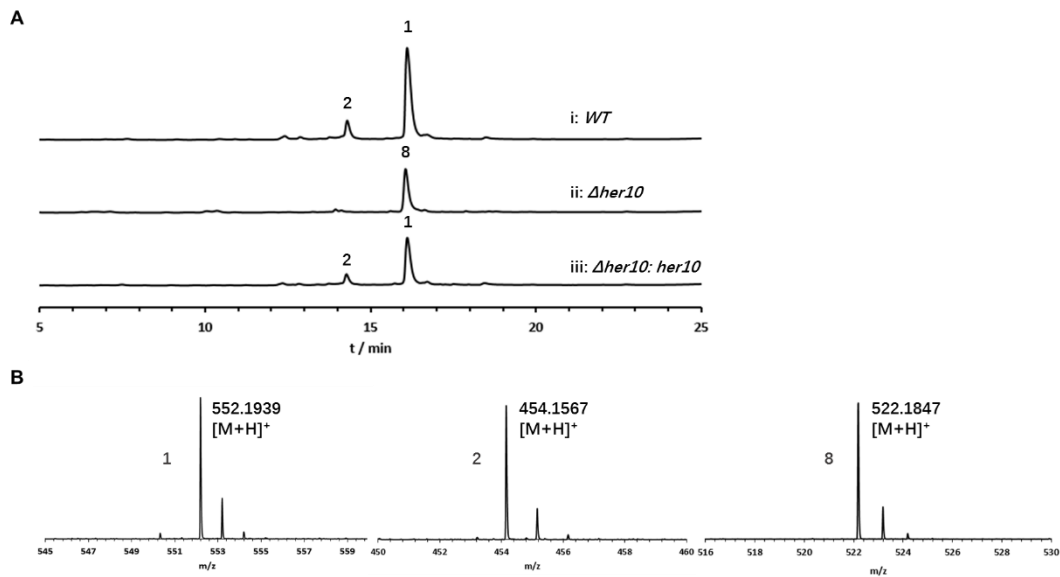

**Figure S81. HPLC analysis method 3 and MS data of *S. sp. L-9-10* wild type,  $\Delta her10$  mutant,  $\Delta her10$  mutant complementation fermentation broth**

**A) HPLC profile; B) MS data for compounds 1, 2 and 8.**

(HPLC method 3: 1 mL/min: T = 0 min, 12.5% B; T = 5 min, 12.5% phase B; T = 20 min, 50% B; T = 22 min, 80% phase B, T = 27 min, 80% B; T = 30 min, 12.5% phase B; A = H<sub>2</sub>O with 0.1% formic acid, B = acetonitrile with 0.1% formic acid).

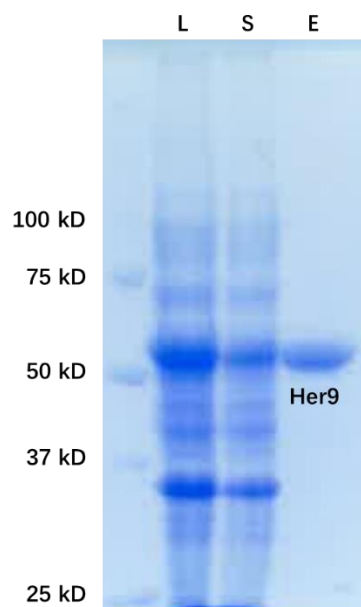

**Figure S82. SDS-PAGE analysis of the purified protein Her9 (61.0 kDa)**

**L: whole-cell lysate, S: soluble fraction, E: purified proteins**



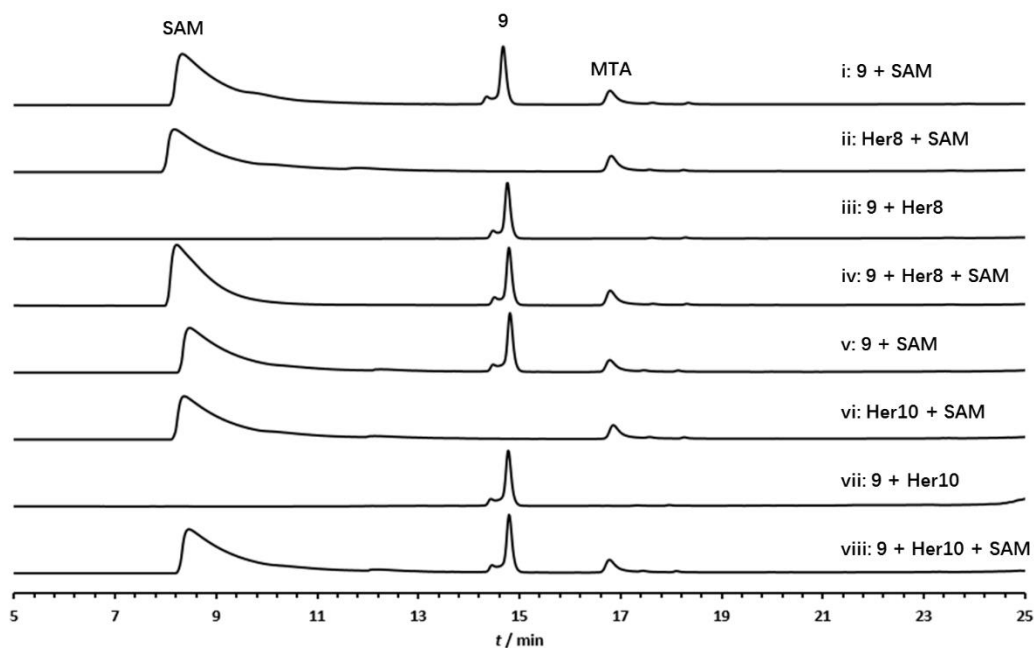

**Figure S83.** *In vitro* assay of Her8, Her10 with compound 9 as substrate using HPLC analysis method 4

(HPLC Method 4: 1 mL/min: T = 0 min, 5% B; T = 5 min, 5% phase B; T = 20 min, 50% B; T = 22 min, 80% phase B, T = 27 min, 80% B; T = 30 min, 5% phase B; A = H<sub>2</sub>O with 0.1% formic acid, B = acetonitrile with 0.1% formic acid).

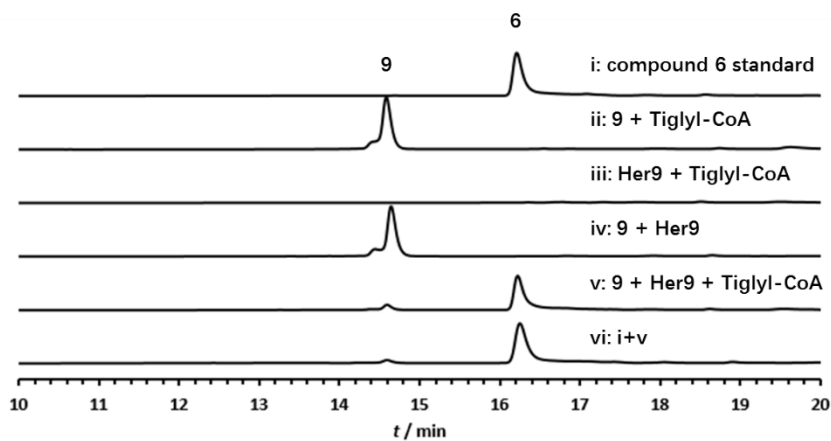

**Figure S84.** *In vitro* assay of Her9 with compound 9 as substrate using HPLC analysis method 4

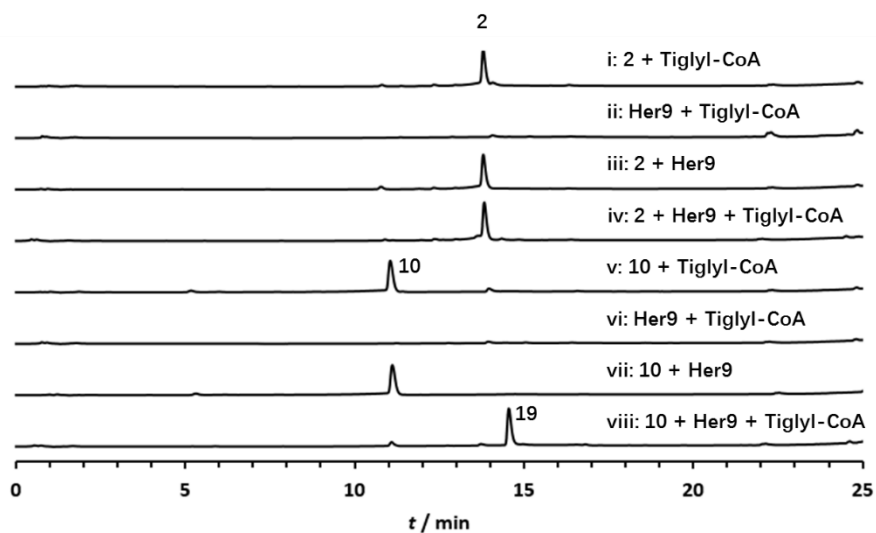

**Figure S85.** *In vitro* assay of Her9 with compounds 2 and 10 as substrate using HPLC analysis method 3

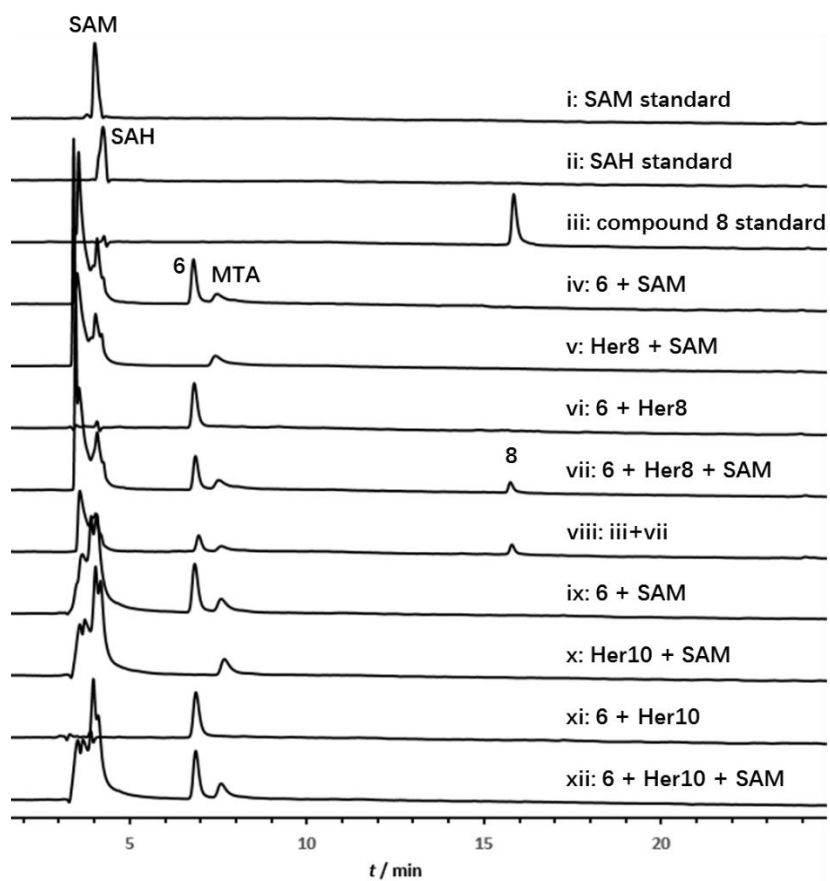

**Figure S86.** *In vitro* assay of Her8, Her10 with compound 6 as substrate using HPLC analysis method 3

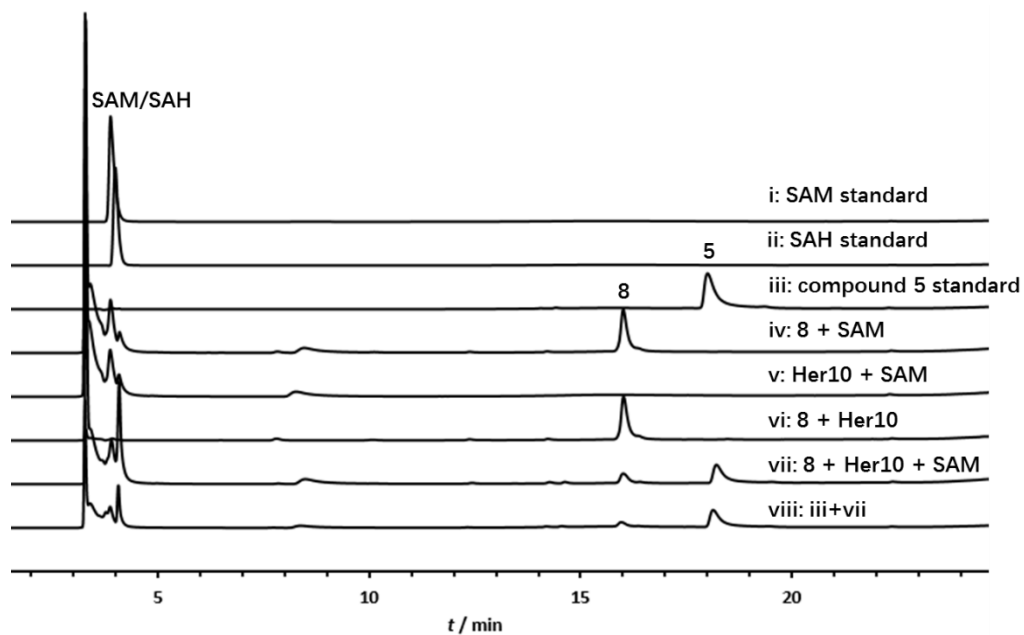

**Figure S87.** *In vitro* assay of Her10 with compound 8 as substrate using HPLC analysis method 3

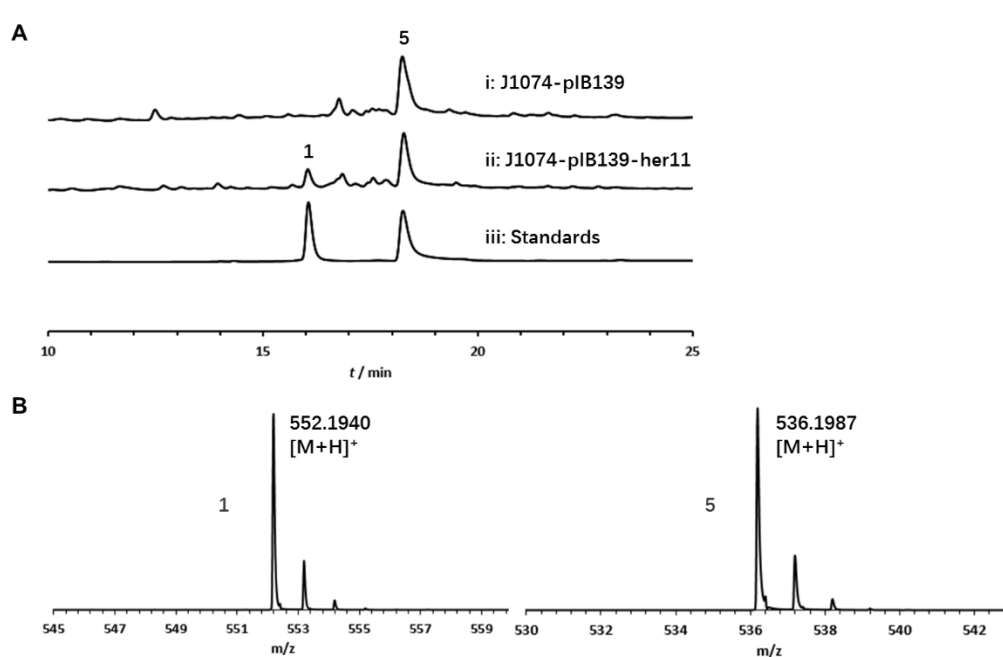

**Figure S88.** HPLC and MS analysis of feeding result for *in vivo* Her11 activity  
 A) HPLC profile; B) MS data for compounds 1 and 5
